# Supplementary material for: Systematic review and network meta-analysis with individual participant data on cord management at preterm birth (iCOMP): study protocol
Source: PubMed Central journal article supplement (PMC7170588; doi:10.1136/bmjopen-2019-034595), 2020-03-29
Supplement: bmjopen-2019-034595.draft_revisions.pdf [file bmjopen-2019-034595.draft_revisions.pdf]

# BMJ Open

BMJ Open is committed to open peer review. As part of this commitment we make the peer review history of every article we publish publicly available.

When an article is published we post the peer reviewers' comments and the authors' responses online. We also post the versions of the paper that were used during peer review. These are the versions that the peer review comments apply to.

The versions of the paper that follow are the versions that were submitted during the peer review process. They are not the versions of record or the final published versions. They should not be cited or distributed as the published version of this manuscript.

BMJ Open is an open access journal and the full, final, typeset and author-corrected version of record of the manuscript is available on our site with no access controls, subscription charges or pay-per-view fees (<http://bmjopen.bmj.com>).

If you have any questions on BMJ Open's open peer review process please email [info.bmjopen@bmj.com](mailto:info.bmjopen@bmj.com)

# BMJ Open

## Systematic review and network meta-analysis with individual participant data on Cord Management at Preterm Birth (iCOMP): study protocol

|                               |                                                                                                                                                                                                                                                                                                                                                                                                                                                                                                                                                                                                                                                                                                                                                                                                                                                                                                                                                                                                                                                                                                                                                                                                                                                                                                                                                                                                                                                                                                                                                                                                                                                                                                                                                                                                                                                                                                                    |
|-------------------------------|--------------------------------------------------------------------------------------------------------------------------------------------------------------------------------------------------------------------------------------------------------------------------------------------------------------------------------------------------------------------------------------------------------------------------------------------------------------------------------------------------------------------------------------------------------------------------------------------------------------------------------------------------------------------------------------------------------------------------------------------------------------------------------------------------------------------------------------------------------------------------------------------------------------------------------------------------------------------------------------------------------------------------------------------------------------------------------------------------------------------------------------------------------------------------------------------------------------------------------------------------------------------------------------------------------------------------------------------------------------------------------------------------------------------------------------------------------------------------------------------------------------------------------------------------------------------------------------------------------------------------------------------------------------------------------------------------------------------------------------------------------------------------------------------------------------------------------------------------------------------------------------------------------------------|
| Journal:                      | <i>BMJ Open</i>                                                                                                                                                                                                                                                                                                                                                                                                                                                                                                                                                                                                                                                                                                                                                                                                                                                                                                                                                                                                                                                                                                                                                                                                                                                                                                                                                                                                                                                                                                                                                                                                                                                                                                                                                                                                                                                                                                    |
| Manuscript ID                 | bmjopen-2019-034595                                                                                                                                                                                                                                                                                                                                                                                                                                                                                                                                                                                                                                                                                                                                                                                                                                                                                                                                                                                                                                                                                                                                                                                                                                                                                                                                                                                                                                                                                                                                                                                                                                                                                                                                                                                                                                                                                                |
| Article Type:                 | Protocol                                                                                                                                                                                                                                                                                                                                                                                                                                                                                                                                                                                                                                                                                                                                                                                                                                                                                                                                                                                                                                                                                                                                                                                                                                                                                                                                                                                                                                                                                                                                                                                                                                                                                                                                                                                                                                                                                                           |
| Date Submitted by the Author: | 26-Sep-2019                                                                                                                                                                                                                                                                                                                                                                                                                                                                                                                                                                                                                                                                                                                                                                                                                                                                                                                                                                                                                                                                                                                                                                                                                                                                                                                                                                                                                                                                                                                                                                                                                                                                                                                                                                                                                                                                                                        |
| Complete List of Authors:     | <p>Seidler, Anna Lene; The University of Sydney, NHMRC Clinical Trials Centre<br/> Duley, Lelia; University of Nottingham, Nottingham Clinical Trials Unit<br/> Katheria, Anup; Sharp Healthcare<br/> De Paco Matallana, Catalina; Clinic University Hospital Virgen de la Arrixaca<br/> Dempsey, E; Cork University Maternity Hospital<br/> Rabe, Heike; Brighton and Sussex University Hospitals, Academic Department of Paediatrics<br/> Kattwinkel, John; University of Virginia<br/> Mercer, Judith; University of Rhode Island, College of Nursing<br/> Josephsen, Justin; St Louis University School of Medicine<br/> Fairchild, Karen; University of Virginia<br/> Andersson, Ola; Uppsala Universitet<br/> Hosono, Shigeharu; Jichi Ika University Saitama Medical Center<br/> Sundaram, Venkateshan; Postgraduate Institute of Medical Education and Research, Newborn unit, Dept of Pediatrics<br/> Datta, Vikram; Lady Hardinge Medical College<br/> El-Naggar, Walid; Dalhousie University, Department of Pediatrics<br/> Tarnow-Mordi, William; The University of Sydney, NHMRC Clinical Trials Centre<br/> Debray, Thomas; University Medical Center Utrecht, Julius Center for Health Sciences and Primary Care<br/> Hooper, Stuart B.; Monash University, The Ritchie Centre, Obstetrics &amp; Gynaecology<br/> Kluckow, Martin; University of Sydney,<br/> Polglase, Graeme; Monash University, The Ritchie Centre, Obstetrics &amp; Gynaecology<br/> Davis, Peter; The Royal Women's Hospital, Newborn Research<br/> Montgomery, Alan; University of Nottingham, Nottingham Clinical Trials Unit<br/> Hunter, Kylie; NHMRC Clinical Trials Centre, University of Sydney<br/> Barba, Angie; The University of Sydney, NHMRC Clinical Trials Centre<br/> Simes, John; University of Sydney, NHMRC Clinical Trials Centre<br/> Askie, Lisa; University of Sydney, NHRMC Clinical Trials Centre</p> |
| Keywords:                     | preterm birth, umbilical cord clamping, placental transfusion, umbilical cord milking, individual participant data meta-analysis, network meta-analysis                                                                                                                                                                                                                                                                                                                                                                                                                                                                                                                                                                                                                                                                                                                                                                                                                                                                                                                                                                                                                                                                                                                                                                                                                                                                                                                                                                                                                                                                                                                                                                                                                                                                                                                                                            |

1  
2  
3  
4  
5  
6  
7  
8  
9  
10  
11  
12  
13  
14  
15  
16  
17  
18  
19  
20  
21  
22  
23  
24  
25  
26  
27  
28  
29  
30  
31  
32  
33  
34  
35  
36  
37  
38  
39  
40  
41  
42  
43  
44  
45  
46  
47  
48  
49  
50  
51  
52  
53  
54  
55  
56  
57  
58  
59  
60

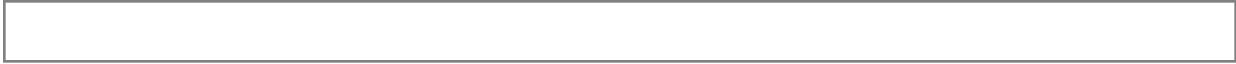

SCHOLARONE™  
Manuscripts

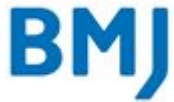

I, the Submitting Author has the right to grant and does grant on behalf of all authors of the Work (as defined in the below author licence), an exclusive licence and/or a non-exclusive licence for contributions from authors who are: i) UK Crown employees; ii) where BMJ has agreed a CC-BY licence shall apply, and/or iii) in accordance with the terms applicable for US Federal Government officers or employees acting as part of their official duties; on a worldwide, perpetual, irrevocable, royalty-free basis to BMJ Publishing Group Ltd ("BMJ") its licensees and where the relevant Journal is co-owned by BMJ to the co-owners of the Journal, to publish the Work in this journal and any other BMJ products and to exploit all rights, as set out in our [licence](#).

The Submitting Author accepts and understands that any supply made under these terms is made by BMJ to the Submitting Author unless you are acting as an employee on behalf of your employer or a postgraduate student of an affiliated institution which is paying any applicable article publishing charge ("APC") for Open Access articles. Where the Submitting Author wishes to make the Work available on an Open Access basis (and intends to pay the relevant APC), the terms of reuse of such Open Access shall be governed by a Creative Commons licence – details of these licences and which [Creative Commons](#) licence will apply to this Work are set out in our licence referred to above.

Other than as permitted in any relevant BMJ Author's Self Archiving Policies, I confirm this Work has not been accepted for publication elsewhere, is not being considered for publication elsewhere and does not duplicate material already published. I confirm all authors consent to publication of this Work and authorise the granting of this licence.

|                                         |                                                                                                                                                                                                                                                                                                                                                                                                                                                                                                                                                                                                                                                                                                                                                                                                                                                                                                                                                                                                                                                                                                                                                                                                                                                                                                                                                                                                                                                                                                                                             |
|-----------------------------------------|---------------------------------------------------------------------------------------------------------------------------------------------------------------------------------------------------------------------------------------------------------------------------------------------------------------------------------------------------------------------------------------------------------------------------------------------------------------------------------------------------------------------------------------------------------------------------------------------------------------------------------------------------------------------------------------------------------------------------------------------------------------------------------------------------------------------------------------------------------------------------------------------------------------------------------------------------------------------------------------------------------------------------------------------------------------------------------------------------------------------------------------------------------------------------------------------------------------------------------------------------------------------------------------------------------------------------------------------------------------------------------------------------------------------------------------------------------------------------------------------------------------------------------------------|
| <b>Title</b>                            | <b>Systematic review and network meta-analysis with individual participant data on Cord Management at Preterm Birth (iCOMP): study protocol</b>                                                                                                                                                                                                                                                                                                                                                                                                                                                                                                                                                                                                                                                                                                                                                                                                                                                                                                                                                                                                                                                                                                                                                                                                                                                                                                                                                                                             |
| <b>Author names</b>                     | Anna Lene Seidler <sup>1</sup> , Lelia Duley <sup>2</sup> , Anup Katheria <sup>3</sup> , Catalina De Paco Matallana <sup>4</sup> , Eugene Dempsey <sup>5</sup> , Heike Rabe <sup>6</sup> , John Kattwinkel <sup>7</sup> , Judith Mercer <sup>8</sup> , Justin Josephsen <sup>9</sup> , Karen Fairchild <sup>7</sup> , Ola Andersson <sup>10</sup> , Shigeharu Hosono <sup>11</sup> , Venkateshan Sundaram <sup>12</sup> , Vikram Datta <sup>13</sup> , Walid El-Naggar <sup>14</sup> , William Tarnow-Mordi <sup>1</sup> , Thomas P.A. Debray <sup>15</sup> , Stuart Hooper <sup>16</sup> , Martin Kluckow <sup>17</sup> , Graeme Polglase <sup>16</sup> , Peter Davis <sup>18</sup> , Alan Montgomery <sup>2</sup> , Kylie E Hunter <sup>1</sup> , Angie Barba <sup>1</sup> , John Simes <sup>1</sup> & Lisa Askie <sup>1</sup> on behalf of the iCOMP collaboration                                                                                                                                                                                                                                                                                                                                                                                                                                                                                                                                                                                                                                                                       |
| <b>Author affiliations</b>              | <sup>1</sup> National Health and Medical Research Council Clinical Trials Centre, University of Sydney, Sydney, Australia<br><sup>2</sup> Nottingham Clinical Trials Unit, University of Nottingham, Nottingham, UK<br><sup>3</sup> Sharp Healthcare, San Diego, California, USA<br><sup>4</sup> Clinic University Hospital Virgen de la Arrixaca, Murcia, Spain<br><sup>5</sup> Cork University Maternity Hospital, Cork, Ireland<br><sup>6</sup> Brighton and Sussex Medical School, University of Sussex, Brighton, UK<br><sup>7</sup> University of Virginia, Charlottesville, Virginia, USA<br><sup>8</sup> The University of Rhode Island, Kingston, Rhode Island, USA<br><sup>9</sup> St Louis University School of Medicine, St. Louis, Missouri, USA<br><sup>10</sup> Uppsala University, Sweden<br><sup>11</sup> Jichi Medical University Saitama Medical Center, Saitama, Japan<br><sup>12</sup> Post Graduate Institute of Medical Education & Research, Chandigarh, India<br><sup>13</sup> Lady Hardinge Medical College, New Delhi, India<br><sup>14</sup> Department of Pediatrics, Dalhousie University, Halifax, Canada<br><sup>15</sup> Julius Center for Health Sciences and Primary Care, University Medical Center Utrecht, Utrecht, the Netherlands<br><sup>16</sup> The Ritchie Centre, Obstetrics & Gynaecology, Monash University, Melbourne, Australia<br><sup>17</sup> Faculty of Medicine and Health, University of Sydney, Sydney, Australia<br><sup>18</sup> The Royal Women's Hospital, Melbourne, Australia |
| <b>Corresponding author</b>             | Correspondence to:<br>Anna Lene Seidler<br>NHMRC Clinical Trials Centre, University of Sydney<br>Locked Bag 77, Camperdown NSW 1450, Australia<br><a href="mailto:lene.seidler@ctc.usyd.edu.au">lene.seidler@ctc.usyd.edu.au</a><br>+61 2 9562 5082                                                                                                                                                                                                                                                                                                                                                                                                                                                                                                                                                                                                                                                                                                                                                                                                                                                                                                                                                                                                                                                                                                                                                                                                                                                                                         |
| <b>Disclaimers</b>                      | None.                                                                                                                                                                                                                                                                                                                                                                                                                                                                                                                                                                                                                                                                                                                                                                                                                                                                                                                                                                                                                                                                                                                                                                                                                                                                                                                                                                                                                                                                                                                                       |
| <b>Source(s) of support</b>             | Developing the protocol and establishing the collaborative group was supported by the UK National Institute of Health Research (grant RPPG060910107). Funding to undertake data collection and data analysis for the iCOMP Collaboration has been provided by the Australian National Health and Medical Research Council (grant APP1163585).                                                                                                                                                                                                                                                                                                                                                                                                                                                                                                                                                                                                                                                                                                                                                                                                                                                                                                                                                                                                                                                                                                                                                                                               |
| <b>Word count</b>                       | 4,734                                                                                                                                                                                                                                                                                                                                                                                                                                                                                                                                                                                                                                                                                                                                                                                                                                                                                                                                                                                                                                                                                                                                                                                                                                                                                                                                                                                                                                                                                                                                       |
| <b>Number of figures and tables</b>     | Number of figures: 2<br>Number to tables: 1                                                                                                                                                                                                                                                                                                                                                                                                                                                                                                                                                                                                                                                                                                                                                                                                                                                                                                                                                                                                                                                                                                                                                                                                                                                                                                                                                                                                                                                                                                 |
| <b>Conflict of interest declaration</b> | Lelia Duley, Anup Katheria, Catalina De Paco Matallana, Eugene Dempsey, Heike Rabe, John Kattwinkel, Judith Mercer, Justin Josephsen, Karen Fairchild, Ola Andersson, Shigeharu Hosono, Venkateshan Sundaram, Vikram Datta, Walid El-Naggar, and William Tarnow-Mordi are Chief Investigators for eligible trials.                                                                                                                                                                                                                                                                                                                                                                                                                                                                                                                                                                                                                                                                                                                                                                                                                                                                                                                                                                                                                                                                                                                                                                                                                          |

## ABSTRACT

**Introduction:** Timing of cord clamping and other cord management strategies may improve outcomes at preterm birth. However, it is unclear whether benefits apply to all preterm subgroups such as those who usually receive immediate neonatal care. Previous and current trials compare various policies, including immediate cord clamping, time- or physiology-based deferred cord clamping, and cord milking. Individual participant data (IPD) enables exploration of different strategies within subgroups. Network meta-analysis (NMA) enables comparison and ranking of all available interventions using a combination of direct and indirect comparisons.

**Objectives:** 1) To evaluate the effectiveness of cord management strategies for preterm infants on neonatal mortality and morbidity overall and for different participant characteristics using IPD meta-analysis; and 2) to evaluate and rank the effect of different cord management strategies for preterm births on mortality and other key outcomes using NMA.

**Methods and analysis:** We will conduct a systematic search of Medline, Embase, clinical trial registries, and other sources for all planned, ongoing and completed randomised controlled trials comparing alternative cord management strategies at preterm birth (before 37 weeks' gestation). IPD will be sought for all trials. First, deferred clamping and cord milking will be compared with immediate clamping in pairwise IPD meta-analyses. The primary outcome will be death prior to hospital discharge. Effect differences will be explored for pre-specified subgroups of participants. Second, all identified cord management strategies will be compared and ranked in an IPD NMA for the primary outcome and the key secondary outcomes intraventricular haemorrhage (any grade) and infant blood transfusions (any). Treatment effect differences by participant characteristics will be identified. Inconsistency and heterogeneity will be explored.

**Ethics and dissemination:** Approved by University of Sydney Human Research Ethics Committee (2018/886). Results will be relevant to clinicians, guideline-developers and policy-makers, and will be disseminated via publications, presentations, and media releases.

**Registration:** Australian New Zealand Clinical Trials Registry: ACTRN12619001305112

## KEYWORDS

Preterm birth, umbilical cord clamping, umbilical cord milking, placental transfusion, individual participant data meta-analysis, network meta-analysis, prospective meta-analysis

## STRENGTH AND LIMITATIONS OF THIS STUDY

- This will be the most comprehensive review to date of interventions for umbilical cord management in preterm infants and the findings will be highly relevant to clinicians and guideline developers
- The use of individual participant data will allow assessment of the best treatment option for key subgroups of participants
- Network meta-analysis will enable the comparison and ranking of all available treatment options using direct and indirect evidence
- For some of the trials it will not be possible to obtain individual participant data, so published aggregate results will be used instead
- Risk of bias in the primary trials will be assessed using Cochrane criteria, and certainty of evidence for the meta-analyses will be appraised using the GRADE approach for the pairwise comparisons, and the CINeMA approach for the network meta-analysis

## INTRODUCTION

Currently over 15 million babies are born preterm annually and this number is rising.(1-3) Of these, 1.1 million die, and the morbidity and healthcare costs amongst survivors and their families are high, with preterm survivors having an increased risk of cognitive, developmental and behavioural difficulties, and chronic ill health.(4-9) Hence, even modest improvements in outcomes of preterm birth would substantially benefit the children, their families, and also health services. In uncompromised babies, deferring cord clamping has been shown to be beneficial and is now used in routine practice.(10) However, it is unclear whether these benefits apply to preterm babies who usually receive immediate neonatal care, and whether any benefits outweigh potential harms. In addition, there are multiple competing cord management strategies, such as clamping the cord at different times or milking the cord, and considerations of the infant's respiratory status, and it is currently unknown which strategy yields the best balance of benefits and harms.

### Current approaches to cord clamping

One potential mechanism of deferring umbilical cord clamping is a net transfer of blood from the placenta to the baby known as "placental transfusion". If the cord is not clamped at birth immediately, blood flow between the placenta and the baby may continue for up to five minutes in term infants.(11-13) For preterm births, blood flow may continue for longer,(14) since a greater proportion of fetoplacental circulating blood volume is still in the placenta.(15) This has led to time-based approaches to deferring cord clamping that have been shown to increase peak haematocrit and reduce the need for blood transfusions.(16) Yet, recent findings suggest that placental transfusion does not always occur - blood flow may continue without any net transfer, and sometimes net transfer may be to the placenta.(17) Initial neonatal care and stabilisation traditionally takes place on a resuscitation platform at the side of the room or in an adjacent room. Deferred cord clamping is thus often associated with a delay in neonatal care and this has led to concerns including delayed resuscitation and hypothermia (18) particularly for very preterm infants and infants assessed as requiring resuscitation. An alternate emerging strategy is to provide immediate neonatal care with the cord intact beside the woman using a mobile resuscitation trolley or on the mother's leg. (19-24)

Another potential mechanism of deferred clamping is allowing time for the infant to establish spontaneous breathing whilst still placentally supported. Immediate cord clamping before the infant has established breathing may be harmful since it can lead to large fluctuations in blood pressure, a period of hypoxia, and restricted cardiac function.(25) Animal and pilot human studies suggest that breathing and lung aeration before cord clamping can improve cardiovascular stability and oxygenation, and reduce intraventricular haemorrhage and infant mortality.(26-29) They also suggest that initial respiratory support before clamping the cord can improve cerebral oxygenation and blood pressure, and reduce cerebrovascular impairment compared with immediate cord clamping.(30, 31) This evidence has led to the rise of "physiological cord clamping" which defers clamping until after the onset of breathing. Yet, onset of breathing is not always easy to determine without the assistance of video or extra equipment, whilst timing to cord clamping can be easily measured. In an earlier study,(32) time of onset of breathing in preterm infants receiving gentle stimulation was related to time after birth – within a minute over 90% of preterm infants had begun spontaneous breathing.



1  
2  
3 Cord milking or stripping (pinching the umbilical cord close to the mother and moving the fingers  
4 towards the infant) may be a way to increase preterm blood volume without deferring clamping.(33)  
5 Yet, a preterm lamb model demonstrated that during cord milking there was a transient increase to  
6 carotid blood flow and pressure.(34) A recent trial comparing deferred cord clamping with cord milking  
7 was stopped early in the subgroup of extremely preterm infants (23-27 weeks), as the incidence of  
8 severe intraventricular haemorrhage was higher in the cord milking group.(35) Hence, the effect of cord  
9 milking in different populations needs further elucidation.  
10  
11

### 12 13 **Current guidelines for cord management at birth and previous reviews of aggregate data**

14  
15 Current uncertainties in optimal cord management strategies are reflected in varying guidelines. The  
16 World Health Organization (WHO) recommends late cord clamping (36) unless resuscitation is required,  
17 the National Institute for Health and Care Excellence (NICE) recommends waiting for 30 seconds to 3  
18 minutes if mother and baby are stable, (37) and the International Liaison Committee on Resuscitation  
19 Council (ILCOR) recommends a delay in cord clamping of at least 1 minute. If the baby is assessed as  
20 requiring resuscitation (which is the case in many preterm infants), (38) WHO recommends immediate  
21 clamping, (39) NICE recommends considering cord milking before clamping, and ILCOR concludes that  
22 there is insufficient evidence to make any recommendations. (38)  
23  
24  
25

26 A 2012 Cochrane review of timing of cord clamping for preterm births (40) included 15 trials, with 738  
27 infants, of which one trial (with 40 infants) compared cord milking with immediate cord clamping.(41)  
28 There was heterogeneity in the timing of cord clamping and gestational age at recruitment, and data  
29 were insufficient for reliable conclusions about any of the primary outcomes of the review. A systematic  
30 review and meta-analysis published in 2018 (including 18 trials with 2834 infants) compared the effect  
31 of deferred ( $\geq 30$  seconds) versus early ( $< 30$  seconds) clamping in preterm infants, and found a reduction  
32 in the primary outcome of hospital mortality by 32% (Risk Ratio = 0.68, 95% Confidence Interval = 0.52-  
33 0.90). (16) There was heterogeneity in the definition of 'early cord clamping' ranging from less than 5 to  
34 25 seconds, and "late cord clamping", ranging from 30 to 180 seconds. Recruitment age varied from 22  
35 weeks to 36 weeks gestational age. Most analyses of infant and maternal morbidity were substantially  
36 underpowered. (16) The review concluded that while there is high quality evidence that deferred cord  
37 clamping improves outcomes, individual participant data analyses are urgently needed to further  
38 understand the benefits and potential harms of different cord management strategies, and to  
39 understand whether differential treatment options are advantageous for key subgroups of infants. (16)  
40  
41  
42  
43  
44

45 This ongoing uncertainty about the optimal cord management strategy, and differential cord  
46 management strategies for key subgroups of infants (e.g. for those for which resuscitation and/or  
47 stabilisation is deemed necessary, or extremely preterm infants) has led to 113 planned, ongoing or  
48 published trials (in more than 15,000 preterm babies) that are comparing a range of cord management  
49 strategies. *Individual participant data (IPD) meta-analysis* is the gold standard for combining such trial  
50 data. IPD provides larger statistical power for estimation of treatment effects of rarer secondary  
51 endpoints and enables reliable subgroup analyses to examine hypotheses about differences in  
52 treatment effect, exploring interactions between treatment- and participant-level characteristics. (42)  
53 A *network meta-analysis (NMA)* facilitates data synthesis when there are a range of interventions  
54 available and permits indirect comparisons across all interventions by inferring the relative effectiveness  
55 of two competing treatments through a common comparator.(43, 44) NMA produces relative effect  
56  
57  
58  
59  
60

1  
2  
3 estimates for each intervention compared with every other intervention in the network. These effect  
4 sizes can be used to obtain rankings of the effectiveness of the interventions.(45) Using IPD in a NMA  
5 (as opposed to aggregate data) can improve precision, increase information, and reduce bias. (46)  
6  
7

## 8 **Objectives**

9  
10 The aims of this study are:

- 11 1) to evaluate the effectiveness of cord management strategies for preterm infants on neonatal  
12 mortality and morbidity, and to evaluate patient-level modifiers of treatment effect.
- 13 2) to evaluate, compare and rank the effectiveness of different cord management strategies for  
14 preterm infants on mortality and the key secondary outcomes intraventricular haemorrhage  
15 (any grade) and infant blood transfusions (any).  
16  
17  
18  
19

## 20 **METHODS AND ANALYSIS**

21  
22 We will conduct a systematic review of randomised trials with individual participant data using pairwise  
23 and network meta-analysis, and a nested prospective meta-analysis. The lead investigator for all  
24 potentially eligible studies will be contacted and invited to collaborate and join the individual participant  
25 data Cord Management at Preterm birth (iCOMP) Collaboration. Eligible trials identified up to February  
26 2019 are listed in Supplementary File 1. The Collaboration will undertake this project according to the  
27 methods recommended by the Cochrane Individual Participant Data, Multiple Interventions, and  
28 Prospective Meta-Analysis Methods Groups.(42, 47, 48) This protocol is registered on the Australian  
29 New Zealand Clinical Trials Registry (ANZCTR) and is undergoing editorial review for registration on the  
30 International Prospective Register of Systematic Reviews (PROSPERO). Reporting guidelines for NMA  
31 protocols by Chaimani et al (49) and PRISMA extension for IPDs and protocols (50, 51) have been  
32 followed for reporting (checklist provided in Supplementary File 2).  
33  
34  
35  
36

### 37 **Eligibility criteria**

#### 38 Types of studies

39  
40  
41 Studies will be included if they are randomised trials. Cluster-randomised and quasi-random studies will  
42 be excluded. Studies must compare at least two of the interventions of interest (defined below).  
43  
44

#### 45 Trial participants

46  
47 Participants will be women giving birth preterm (before 37 completed weeks' gestation) and/or their  
48 babies. Individually randomised studies will be eligible for inclusion if the unit of randomisation was  
49 either the woman, or the baby. Women and babies will be included regardless of whether mode of  
50 delivery was vaginal or caesarean, and whether the birth was singleton or multiple. Babies will be  
51 included regardless of whether or not they received immediate resuscitation at birth.  
52  
53

#### 54 Types of interventions and comparators in pairwise meta-analysis

55  
56 For the pairwise meta-analysis we will include all trials that compare an intervention to enhance  
57 umbilical blood flow or allow more time for physiological transition to the comparator immediate cord  
58 clamping. This includes interventions assessing cord management strategies for timing of cord clamping,  
59  
60

1  
2  
3 and other strategies such as cord milking. Trials will be included regardless of whether initial neonatal  
4 care is provided with the umbilical cord intact, or not. Different strategies (i.e. deferred cord clamping  
5 and cord milking) will be analysed in separate subgroups to assess comparability between the groups  
6 by assessing subgroup effects and heterogeneity. They will then be collapsed into one “cord  
7 management intervention” group if they are deemed comparable based on the previous subgroup  
8 assessments. If they are deemed non-comparable they will be analysed and interpreted separately.  
9  
10

#### 11 Types of interventions and comparators in network meta-analysis

12  
13  
14 For the network meta-analysis we will include, as interventions of interest, strategies for timing of cord  
15 clamping, and other cord management strategies to influence umbilical flow and placental transfusion.  
16

17 Thus, interventions of interest include:

- 18 • Immediate cord clamping without milking ( $\leq 15$  seconds or trialist defined)
- 19 • Short deferral of cord clamping ( $>15$  to  $<45$  seconds) without milking
- 20 • Medium deferral of cord clamping ( $\geq 45$  to  $<90$  seconds) without milking
- 21 • Long deferral of cord clamping ( $\geq 90$  seconds) without milking
- 22 • Cord milking or stripping before immediate cord clamping (intact cord milking)
- 23 • Cord milking or stripping before deferred cord clamping (intact cord milking)
- 24 • Cord milking or stripping after immediate cord clamping (cut cord milking)
- 25 • Cord milking or stripping after deferred cord clamping (cut cord milking)
- 26 • Physiological clamping (clamping after aeration of lungs)

27  
28  
29  
30  
31  
32 If we identify other interventions not listed above we will include them if they are addressing cord  
33 management or related strategies to influence umbilical flow and placental transfusion. Again, trials  
34 will be included regardless of whether initial neonatal care is provided with the umbilical cord intact, or  
35 not. Studies evaluating collection and storage of residual placental blood that is then used for  
36 transfusion after birth will be excluded. All possible comparisons between eligible interventions are  
37 displayed in Figure 1. For interpretation purposes, immediate cord clamping will act as the basis  
38 comparison/ parameter.  
39  
40

41  
42 Nodes that specify different timings of cord clamping were defined according to what timing is classified  
43 as immediate clamping, short deferral, medium deferral or long deferral according to the literature to  
44 date (as shown in Supplementary File 1), and after discussion with clinicians. Different timings are  
45 commonly compared in head-to-head comparisons, hence, their classification as different intervention  
46 nodes. Similarly, nodes that specify cord milking were classified after a review of current milking  
47 techniques described in the literature and after discussion with clinicians. If insufficient data are  
48 available, categories will be collapsed where possible. For instance, milking before and after immediate  
49 cord clamping could be collapsed into one single immediate cord milking category, or medium and long  
50 delay could be collapsed into a medium to long delay category. We consider the interventions of interest  
51 to be jointly randomisable (i.e. each participant could, in principle, be randomised to any one of the  
52 interventions of interest).  
53  
54  
55  
56  
57  
58  
59  
60

## Types of outcome measures

Trials must report at least one of the clinical outcomes included in this review, as specified in the “measures” section below, to be included.

## Eligibility for nested prospective meta-analysis

Studies are only included in the nested prospective meta-analysis if the investigator/s were blind to outcome data by intervention group at the time the main components of the protocol (i.e. objectives, aims and hypotheses, eligibility criteria, subgroup and sensitivity analyses and main outcomes) were initially agreed in January 2015.

## Information sources and search strategy

The search strategy to identify potentially eligible studies will include a search of the Cochrane Collaboration Pregnancy and Childbirth Review Group’s Trial Register. This register contains trials identified from: monthly searches of the Cochrane Central Register of Controlled Trials (CENTRAL) and CINAHL (EBSCO); weekly searches of Medline (Ovid) and Embase (Ovid); hand searches of specialty journals and major conferences proceedings; and current awareness alerts from further journals and BioMed Central. Further details can be found elsewhere.<sup>(52)</sup> We will identify ongoing trials that may be eligible by searching for published protocols in Medline and Embase, searching online registries of clinical trials, and personal contacts (for example, by asking collaborators to notify any unregistered studies they are aware of). The Chief Investigators of eligible trials will be invited to join the iCOMP Collaboration. They will also be asked if they know of any further planned, ongoing or completed studies. The search strategy is outlined in more detail in Supplementary File 3.

## Selection of studies for inclusion in the review

Two members of the iCOMP Secretariat (see project management section below) will independently assess all the potentially eligible studies identified for inclusion. Disagreements will be resolved by discussion or, if required, by consulting a third member of the iCOMP Secretariat. Studies that are not willing or able to provide IPD will be synthesised where possible using aggregate data.

## Data collection, management, and confidentiality

### Data receipt

De-identified, individual participant level data will be provided by each participating trial. These data will be backed-up and stored in a centralised secure database.

### Data processing

*Data checking:* For each trial, range and internal consistency of all variables will be checked. Intervention details and missing data will be checked against any protocols, published reports, and data collection sheets. Integrity of the randomisation process will be assessed by examining the chronological randomisation sequence and the balance of participant characteristics across intervention groups. Any inconsistencies or missing data will be discussed with the trialists and resolved by consensus. Each included study will be analysed separately and the results sent to the trial investigators for verification

1  
2  
3 prior to inclusion in the iCOMP database. All trial-specific outcomes generated from the IPD will be cross-  
4 checked against published information via a series of crosstabs.  
5

6 *Data re-coding:* Outcome data may have been collected in different formats across trials. Therefore, the  
7 de-identified data from each of the trials will be extracted and re-formatted into a commonly coded  
8 dataset.  
9

10  
11 *Data transformation and collating:* Once the data from each of the trials are finalised, they will be  
12 combined into a single dataset, but a trial identifier code for each participant will be retained. New  
13 variables will be generated from the combined dataset as required to address the hypotheses to be  
14 tested.  
15

### 16 **Risk of bias assessment and certainty of evidence appraisal**

17  
18 Eligible studies will be assessed for risk of bias using the criteria described in the Cochrane  
19 Handbook(53): random sequence generation; allocation concealment; blinding of participants and  
20 personnel; blinding of outcome assessment; incomplete outcome data; selective reporting; and other  
21 bias. Certainty of evidence will be appraised using the GRADE approach (54) for the pairwise  
22 comparisons, and the rating approach suggested by Salanti and colleagues that is implemented in the  
23 CINeMA application for the network meta-analysis.(55)  
24  
25

### 26 **Outcomes measures for pairwise meta-analysis**

27  
28 All outcome measures for the pairwise meta-analysis are listed in Table 1. The primary outcome will be  
29 death of the baby prior to hospital discharge. As outcomes for babies born very preterm (before 32  
30 weeks' gestation) are different to those born moderately preterm (32 to 37 weeks), separate analyses  
31 will be conducted for these two groups of infants for the secondary outcomes. Where possible,  
32 definitions will be standardised, otherwise outcomes will be used as defined in individual trials.  
33 Secondary outcomes will include measures of neonatal and maternal morbidity, and health service use.  
34  
35

### 36 **Covariates and subgroups for pairwise meta-analysis**

37  
38 Subgroup analyses will be conducted for the primary outcome of death (prior to hospital discharge) and  
39 two key secondary outcomes (IVH any grade and any infant blood transfusion) if sufficient data are  
40 available. All included covariates and subgroups are listed in Table 1. The comparative effects of  
41 alternative cord management strategies may vary depending on key infant risk factors, and/or on the  
42 level and type of neonatal care available at the hospital of birth. Thus, there will be subgroup analyses  
43 based on participant level characteristics and based on hospital level characteristics. If data are  
44 insufficient for the pre-specified subgroup analyses, categories will be collapsed.  
45  
46  
47  
48  
49  
50  
51  
52  
53  
54  
55  
56  
57  
58  
59  
60

Table 1. Measures for individual participant data pairwise meta-analysis

| <b>Outcomes</b>                                         |                                                                                                                                                                                                                                                                                                                                                                                                                                                                                                                                                                                                                                                                                                                                                                                                                                                                                                                                                                                                                                                                                                                                                                                                                                                                                                                                                                                                                          |
|---------------------------------------------------------|--------------------------------------------------------------------------------------------------------------------------------------------------------------------------------------------------------------------------------------------------------------------------------------------------------------------------------------------------------------------------------------------------------------------------------------------------------------------------------------------------------------------------------------------------------------------------------------------------------------------------------------------------------------------------------------------------------------------------------------------------------------------------------------------------------------------------------------------------------------------------------------------------------------------------------------------------------------------------------------------------------------------------------------------------------------------------------------------------------------------------------------------------------------------------------------------------------------------------------------------------------------------------------------------------------------------------------------------------------------------------------------------------------------------------|
| <b>For all infants</b>                                  |                                                                                                                                                                                                                                                                                                                                                                                                                                                                                                                                                                                                                                                                                                                                                                                                                                                                                                                                                                                                                                                                                                                                                                                                                                                                                                                                                                                                                          |
| Primary outcome                                         | <ul style="list-style-type: none"> <li>• Death prior to hospital discharge</li> </ul>                                                                                                                                                                                                                                                                                                                                                                                                                                                                                                                                                                                                                                                                                                                                                                                                                                                                                                                                                                                                                                                                                                                                                                                                                                                                                                                                    |
| <b>For infants born before 32 weeks' gestation</b>      |                                                                                                                                                                                                                                                                                                                                                                                                                                                                                                                                                                                                                                                                                                                                                                                                                                                                                                                                                                                                                                                                                                                                                                                                                                                                                                                                                                                                                          |
| Key secondary outcomes                                  | <ul style="list-style-type: none"> <li>• Death (at any time during duration of follow-up)</li> <li>• Severe intraventricular haemorrhage on cranial ultrasound (grade 3-4)</li> <li>• All grades of intraventricular haemorrhage on cranial ultrasound</li> <li>• Necrotizing enterocolitis <math>\geq</math> grade 2 (or trialist definition)</li> <li>• Late onset sepsis (where possible defined as clinical sepsis &gt; 72 hour after birth)</li> <li>• Patent ductus arteriosus requiring treatment (medical and/or surgical)</li> <li>• Chronic lung disease (at 36 weeks' postmenstrual age or trialist defined)</li> </ul>                                                                                                                                                                                                                                                                                                                                                                                                                                                                                                                                                                                                                                                                                                                                                                                       |
| Other secondary outcomes                                | <ul style="list-style-type: none"> <li>• Death (within 7 days)</li> <li>• Other forms of white matter brain injury (e.g. periventricular leukomalacia, porencephaly)</li> <li>• Respiratory support (mechanical ventilation, CPAP, low nasal flow oxygen)</li> <li>• Duration of respiratory support</li> <li>• Supplemental oxygen at 36 weeks</li> <li>• Retinopathy of prematurity requiring treatment (medical and/or surgical)</li> <li>• Drug treatment for hypotension (yes/no)</li> <li>• Blood transfusion (yes/no)</li> <li>• Blood transfusion (number, volume)</li> <li>• Hypothermia on admission to neonatal unit</li> <li>• Haemoglobin</li> <li>• Haematocrit</li> <li>• Polycythaemia</li> <li>• Jaundice requiring treatment</li> <li>• Birthweight</li> <li>• Length of stay in Neonatal Intensive Care Unit (NICU)/ Special Care Unit (SCU)</li> <li>• Length of stay in hospital</li> <li>• Apgar scores at 1 and 5 minutes</li> <li>• Long term developmental disability (assessed using the Bayley III, and/or other tools):               <ul style="list-style-type: none"> <li>○ cerebral palsy</li> <li>○ neurodevelopmental disability</li> <li>○ score on cognitive scale</li> <li>○ score on language scale</li> <li>○ score on social/emotional scale</li> <li>○ score on motor scale</li> <li>○ score on behaviour scale</li> <li>○ deafness</li> <li>○ blindness</li> </ul> </li> </ul> |
| <b>For infants born at or after 32 weeks' gestation</b> |                                                                                                                                                                                                                                                                                                                                                                                                                                                                                                                                                                                                                                                                                                                                                                                                                                                                                                                                                                                                                                                                                                                                                                                                                                                                                                                                                                                                                          |
| Key secondary outcomes                                  | <ul style="list-style-type: none"> <li>• Death at any time (during duration of follow-up)</li> <li>• Admission to NICU</li> <li>• Blood transfusion (any, number, volume)</li> </ul>                                                                                                                                                                                                                                                                                                                                                                                                                                                                                                                                                                                                                                                                                                                                                                                                                                                                                                                                                                                                                                                                                                                                                                                                                                     |
| Other secondary outcomes                                | <ul style="list-style-type: none"> <li>• Death (within 7 days)</li> <li>• Haemoglobin</li> <li>• Haematocrit</li> <li>• Length of stay in NICU/SCU</li> <li>• Length of stay in hospital</li> <li>• Duration of respiratory support (mechanical ventilation, CPAP, low flow nasal oxygen)</li> <li>• Chronic lung disease</li> <li>• Late onset sepsis (&gt; 72 hour after birth)</li> <li>• Patent ductus arteriosus requiring treatment (medical and/or surgical)</li> <li>• Drug treatment for hypotension</li> </ul>                                                                                                                                                                                                                                                                                                                                                                                                                                                                                                                                                                                                                                                                                                                                                                                                                                                                                                 |

|                                               |                                                                                                                                                                                                                                                                                                                                                                                                                                                                                                                                                                                                                                                                                                                                                                                                                                                                                                                                                                                                                                                                                                                                              |
|-----------------------------------------------|----------------------------------------------------------------------------------------------------------------------------------------------------------------------------------------------------------------------------------------------------------------------------------------------------------------------------------------------------------------------------------------------------------------------------------------------------------------------------------------------------------------------------------------------------------------------------------------------------------------------------------------------------------------------------------------------------------------------------------------------------------------------------------------------------------------------------------------------------------------------------------------------------------------------------------------------------------------------------------------------------------------------------------------------------------------------------------------------------------------------------------------------|
|                                               | <ul style="list-style-type: none"> <li>• Hypothermia on admission to neonatal unit or postnatal ward</li> <li>• Apgar score at 1 and 5 minutes</li> <li>• Long term developmental disability (assessed using the Bayley III, and/or other tools): <ul style="list-style-type: none"> <li>○ cerebral palsy</li> <li>○ neurodevelopmental disability</li> <li>○ score on cognitive scale</li> <li>○ score on language scale</li> <li>○ score on social/emotional scale</li> <li>○ score on motor scale</li> <li>○ score on behaviour scale</li> <li>○ deafness</li> <li>○ blindness</li> </ul> </li> </ul>                                                                                                                                                                                                                                                                                                                                                                                                                                                                                                                                     |
| <b>For all women</b>                          |                                                                                                                                                                                                                                                                                                                                                                                                                                                                                                                                                                                                                                                                                                                                                                                                                                                                                                                                                                                                                                                                                                                                              |
| Secondary outcomes                            | <ul style="list-style-type: none"> <li>• Maternal death</li> <li>• Postpartum haemorrhage</li> <li>• Postnatal sepsis requiring treatment</li> <li>• Manual removal of placenta</li> <li>• Retained placenta</li> <li>• Not breast feeding when baby discharged from hospital</li> <li>• Postnatal depression</li> <li>• Blood transfusion</li> </ul>                                                                                                                                                                                                                                                                                                                                                                                                                                                                                                                                                                                                                                                                                                                                                                                        |
| <b>Covariates/ Subgroups</b>                  |                                                                                                                                                                                                                                                                                                                                                                                                                                                                                                                                                                                                                                                                                                                                                                                                                                                                                                                                                                                                                                                                                                                                              |
| <i>Participant-level characteristics</i>      |                                                                                                                                                                                                                                                                                                                                                                                                                                                                                                                                                                                                                                                                                                                                                                                                                                                                                                                                                                                                                                                                                                                                              |
|                                               | <ul style="list-style-type: none"> <li>• Gestation at birth</li> <li>• Type of pregnancy: singleton; multiple</li> <li>• Maternal age</li> <li>• Mode of birth: caesarean before onset of labour; caesarean after onset of labour; vaginal</li> <li>• Onset of labour: spontaneous onset or spontaneous prelabour ruptured membranes; not spontaneous onset or spontaneous prelabour ruptured membranes; not known whether spontaneous onset of labour or spontaneous prelabour ruptured membranes</li> <li>• Type of breathing onset: spontaneous breathing onset; supported lung aeration (ventilation); unknown</li> <li>• Time of breathing onset relative to cord clamping: before cord clamping/milking; after cord clamping/milking; unknown</li> <li>• Sex (male, female, uncertain/other)</li> <li>• Ethnicity (trialist defined)</li> <li>• Small for gestational age (trialist defined): yes/no</li> <li>• Maternal antenatal/intrapartum sepsis requiring treatment (trialist defined): yes/no</li> <li>• Assessed as needing resuscitation and/or stabilisation (yes/no)</li> <li>• Type of uterotonic drug (if any)</li> </ul> |
| <i>Hospital / trial-level characteristics</i> |                                                                                                                                                                                                                                                                                                                                                                                                                                                                                                                                                                                                                                                                                                                                                                                                                                                                                                                                                                                                                                                                                                                                              |
|                                               | <ul style="list-style-type: none"> <li>• Highest level of neonatal unit available at site: neonatal intensive care unit, neonatal unit (some capacity to provide ventilation), special care baby unit (no ventilation available), no neonatal unit or special care baby unit</li> <li>• Planned timing of uterotonic drug: before cord clamping; after/at cord clamping; timing mixed or not known</li> <li>• Planned position of the baby relative to the placenta whilst cord intact: level with placenta (between level of woman's bed and her abdomen/anterior thigh); more than 20 cm below level of placenta; position mixed or not known</li> <li>• Need for immediate resuscitation at birth: infants requiring immediate resuscitation at birth excluded; infants requiring immediate resuscitation at birth included; unclear whether infants requiring immediate resuscitation at birth included or excluded</li> <li>• Type of consent waiver of consent: deferred consent; informed consent or assent; type of consent unclear</li> <li>• Study year</li> </ul>                                                                 |

### **Data analysis for pairwise meta-analysis**

The full Statistical Analysis Plan will be agreed on by the iCOMP Collaboration before any analyses are undertaken. Analyses will include all randomised participants for which data are available, and the primary analyses will be based on intention-to-treat. Analyses will be conducted using the open-source software R.(56)

For each outcome, a one-stage approach to analysis will be employed to include individual participant data from all eligible trials in a multilevel random or mixed effects regression model. Aggregate data will be included where individual participant data are unavailable.(57) Relative heterogeneity of treatment effects across trials will be estimated using  $I^2$ , with further inclusion in secondary models of participant level and trial level covariates to explain the sources of heterogeneity. Prediction intervals will be estimated to ascertain absolute heterogeneity. Forest plots will be presented by trial for the primary outcome, and for any secondary outcomes where there is evidence of heterogeneity across trials.

We will use a generalised linear modelling framework, with the choice of outcome distribution and link function dependent on outcome type. For example, binomial with log link will be used to estimate risk ratios for binary outcomes, and Gaussian with identity link for mean differences, with log-transformation of the data if appropriate. We will follow a similar approach for secondary outcomes. For estimation of subgroup effects, we will present forest plots of pooled treatment effects according to pre-specified subgroup variables, and estimate effects by including appropriate interaction terms between a subgroup variable and treatment arm in the regression models. The results of all comparative analyses will be presented using appropriate estimates of treatment effect along with 95% confidence intervals and two-sided p-values.

In advance of conducting the analyses, we will decide whether there are sufficient reliable data to allow meaningful analysis of any individual outcome or subgroup. If not, the analysis will not be conducted, and this will be reported subsequently.

### **Outcome measures for network meta-analysis**

The primary outcome for the network meta-analysis will be death of the baby during the initial hospital stay. If data availability permits, IVH (any grade) and blood transfusion (any) will be analysed as two key secondary outcomes.

### **Covariates and subgroups for network meta-analysis**

Gestational week at birth and highest level of available care will be considered as effect modifiers to improve consistency of the NMA model. There will be subgroup analyses assessing treatment effect by week of gestational age, and by comparing babies assessed as in need of immediate resuscitation versus not in need of immediate resuscitation.

### **Assessment of the transitivity assumption for network meta-analysis**

Transitivity in the network will be assured by only including interventions that are regarded as jointly randomisable and by limiting our sample to preterm infants. Gestational age at birth, hospital setting



(highest level of available neonatal care), as well as study year may act as effect modifiers and could influence the transitivity of the network. We will therefore investigate whether these variables are distributed evenly across comparisons. If we find any of those variables to be unevenly distributed, they will be included in the network as covariates to investigate their influence on the network and on possible inconsistency.

### **Data analysis for network meta-analysis**

As for the pairwise meta-analysis, all analyses will be specified a-priori in a full Statistical Analysis Plan, all randomised participants for which data are available will be included, and the primary analyses will be intention-to-treat.

We will calculate a two-step random-effects contrast-based network meta-regression to compare and rank all available interventions for the primary outcome death (during initial hospital stay) and, if data permits, for the two key secondary outcomes - IVH (any grade) and blood transfusion (any). Summary risk ratios with confidence and prediction intervals will be presented for each pairwise comparison in a league table. We will estimate the ranking probability of each intervention being at each rank, and we will use surface under the cumulative ranking curve (SUCRA) and mean ranks to obtain a treatment hierarchy. A frequentist approach to analysis will be used. Should models not converge, a Bayesian approach will be used instead, setting a prior of no effect and a large variance. Correlations induced by multi-arm studies will be accounted for using multivariate distributions.

As a second step, interactions between key covariates and effect estimates will be tested, assuming a common interaction across comparisons. If there are statistically significant interactions between covariates and treatment effects, we will provide probability rankings of intervention effects by subgroup for these covariates. A single heterogeneity parameter will be assumed for each network.

### **Assessment of inconsistency for network meta-analysis**

Global consistency will be assessed using the Q statistics for inconsistency and the design-by-treatment interaction model. Local consistency will be assessed using the loop-specific approach and the node-splitting approach to explore sources of inconsistency. Since tests of inconsistency are known to have low power,<sup>(58)</sup> results will be interpreted with caution, and potential known sources for inconsistency will be explored even if there is no statistical evidence of inconsistency. Any detected inconsistency will be explored by including covariates into the model, and by excluding potential outlier studies in sensitivity analyses. A judgement of excessive heterogeneity or inconsistency would prevent the interpretation and reporting of the network meta-analysis.

### **Assessment of compliance with the allocated intervention**

Compliance with the interventions will be described for each trial. For studies of early versus deferred cord clamping this will be based on i) the time to cord clamping in each allocated group, and ii) the difference in time between early and deferred clamping. For studies comparing cord milking with no milking, this will be based on i) time to cord clamping in the allocated groups, and ii) reported compliance with cord milking in both groups.

### Assessment of selection bias

We will perform a nested prospective meta-analysis as a sensitivity analysis, to detect potential differences between prospectively and retrospectively included studies that may point to selection or publication bias. We expect to also be able to include some unreported outcomes sourced from the individual participant data provided by the included studies, alleviating selective outcome reporting bias. Additionally, comparison-adjusted and contour-enhanced funnel plots(59) will be utilised to examine whether there are differences in results between more and less precise studies.

### Adjustments for multiple testing

There is only one primary outcome, and few key secondary outcomes for this study. For other secondary outcomes, no formal adjustments for multiple testing are planned but instead, we will be following the approach outlined by Schulz and Grimes(60): as secondary outcomes examined in this study are interrelated, we will interpret the pattern of results, examining consistency of results across related outcomes, instead of focusing on any single, statistically significant result. All secondary outcomes will be reported. Subgroup analyses will be performed by testing for interactions and findings will be reported as exploratory.(61)

### Planned sensitivity analyses

To assess whether results are robust to trial characteristics and methods of analysis, the following sensitivity analyses will be conducted for the primary outcome, if data are sufficient:

- Excluding studies with high risk of bias for sequence generation and/or concealment of allocation and/or loss to follow up for pairwise and network meta-analysis;
- For trials comparing early cord clamping with deferred clamping, analysis of outcomes weighted by degree of separation in mean actual timing of cord clamping between intervention and control groups for pairwise meta-analysis;
- Analysis of outcomes weighted by degree of separation in haemoglobin (at 24 hours) achieved between intervention and control groups for pairwise meta-analysis (as a surrogate for net placental transfusion);
- For trials with deferred cord clamping, an additional dose-response analysis assessing intended time of cord clamping deferral as a continuous variable will be performed;
- Exploratory analysis based on actual, rather than intended, timing of cord clamping for individual participants for pairwise and network meta-analysis;
- The impact of missing data on the effects of the included interventions for the primary outcome may be explored (if appropriate).

### Project management

The iCOMP Collaboration will invite membership from representatives of each of the included trials contributing individual participant data, have a Secretariat, and invite methodological and clinical experts who will form an Advisory Group. The Secretariat will be responsible for data collection, management and analysis, and for communication within the Collaboration.

### Ethical issues

1  
2  
3 For each included trial, ethics approval has been previously granted by their respective Human Research  
4 Ethics Committees (or equivalent), and informed consent has been obtained from all participants. The  
5 Chief Investigators of the included trials remain the custodians of their own trial's data. Individual  
6 participant data from the included trials will be de-identified before sharing with the iCOMP  
7 Collaboration. Ethics approval for this project has been granted by the University of Sydney Human  
8 Research Ethics Committee (number: 2018/886).  
9  
10

### 11 **Publication policy**

12  
13  
14 The key methods for this meta-analysis protocol were agreed by the iCOMP Collaborators in January  
15 2015, before unblinding of any outcome data from the studies included in the nested prospective meta-  
16 analysis. This manuscript was discussed at the iCOMP Collaborators' meeting held at the Pediatric  
17 Academic Societies meeting in San Diego in April 2015. At this meeting it was agreed the protocol should  
18 be expanded to include a retrospective systematic review and individual participant data and network  
19 meta-analysis with a nested prospective meta-analysis. The protocol was then revised, based on further  
20 discussion, and circulated to members of the iCOMP Collaboration for further comment and agreement  
21 prior to manuscript submission.  
22  
23

24  
25 Participating trialists in the prospective meta-analysis, when reporting results from their own trials, will  
26 endeavour to include a statement that their trial is part of this prospective meta-analysis in any  
27 published manuscripts or conference abstracts. Any reports of the results of this meta-analysis will be  
28 published either in the name of the collaborative group, or by representatives of the collaborative group  
29 on behalf of the iCOMP Collaboration, as agreed by members of the collaborative group. Draft reports  
30 will be circulated to the collaborative group for comment and approval before submission for  
31 publication.  
32  
33

## 34 **DISCUSSION**

35  
36  
37 There is an urgency to conduct this systematic review and pairwise individual participant data and  
38 network meta-analysis so we can make sense of the numerous trials currently being undertaken, inform  
39 clinical practice, and identify the most promising interventions for further evaluation.  
40  
41

42 This meta-analysis offers an opportunity to reliably test important hypotheses that cannot be resolved  
43 by any of the individual trials, either alone or in simple combination. Coordinating international efforts  
44 in this way will help achieve consensus on the most important substantive clinical outcomes to assess  
45 in any future trials as needed. Unequivocal synthesised results, together with the identification of key  
46 determinants (e.g. effect modifiers), will be critical for translating evidence from this meta-analysis  
47 directly into practice. Figure 2 shows the network of comparisons available from the trials identified to  
48 date. We plan to complete study identification and individual participant data collection by end-2019,  
49 then conduct the analyses and disseminate results by mid-2021.  
50  
51

52  
53 This study is only possible because trialists around the world have agreed to collaborate to share the  
54 individual participant data from their cord management trials. This collaborative approach will enable  
55 us to move beyond the traditional "one-size-fits-all" and towards precision medicine, to find the optimal  
56 intervention from a range of treatment options for each individual woman and her baby, based on their  
57 individual characteristics and risk factors.  
58  
59  
60

## **Patient and Public Involvement**

We will invite patients and the public to comment on this research project, to increase its accessibility from their perspective.

## **Acknowledgements**

Thanks to Sarah Somerset, Min Yang, Charlotte Lloyd, and Virginia Portillo for previous support for the Secretariat and input into earlier protocol drafts.

## **Competing interests**

None known.

## **Non-financial competing interests**

Lelia Duley, Anup Katheria, Catalina De Paco Matallana, Eugene Dempsey, Heike Rabe, John Kattwinkel, Judith Mercer, Justin Josephsen, Karen Fairchild, Ola Andersson, Shigeharu Hosono, Venkateshan Sundaram, Vikram Datta, Walid El-Naggar, and William Tarnow-Mordi are Chief Investigators for potentially eligible trials.

## **Funding**

Developing the protocol and establishing the collaborative group was supported by the UK National Institute of Health Research with a grant entitled “The Preterm Birth Programme” (number RPPG060910107). This grant presents independent research commissioned by the National Institute for Health Research (NIHR) under its Programme Grants for Applied Research funding scheme. The views expressed are those of the authors and not necessarily those of the NHS, the NIHR or the Department of Health. Funding for individual trials remains the responsibility of the trialists themselves. Funding to undertake data collection and data analysis for the iCOMP Collaboration has been provided by the Australian National Health and Medical Research Council via a Project Grant (APP1163585).

## **Author contributions**

LD and LA conceived the idea. ALS, LA, and LD drafted the protocol with input from all authors. All authors have agreed the final manuscript. ALS is the guarantor.

## **List of abbreviations**

iCOMP – individual participant data on **C**ord **M**anagement at **P**reterm birth

CENTRAL – Cochrane Central Register of Controlled Trials

CINeMA – Confidence in Network meta-analysis

CPAP – continuous positive airway pressure

IPD – individual participant data

NICE – National Institute for Health and Care Excellence

1  
2  
3  
4  
5  
6  
7  
8  
9  
10  
11  
12  
13  
14  
15  
16  
17  
18  
19  
20  
21  
22  
23  
24  
25  
26  
27  
28  
29  
30  
31  
32  
33  
34  
35  
36  
37  
38  
39  
40  
41  
42  
43  
44  
45  
46  
47  
48  
49  
50  
51  
52  
53  
54  
55  
56  
57  
58  
59  
60

NICU – neonatal intensive care unit

NIHR – National Institute for Health Research

NMA – network meta-analysis

PRISMA – Preferred Reporting Items for Systematic Review and Meta-Analysis

UK – United Kingdom

WHO – World Health Organization

ILCOR – International Liaison Committee on Resuscitation

PROSPERO – International prospective register of systematic reviews

For peer review only

**iCOMP collaboration members:**

**Secretariat:** Anna Lene Seidler<sup>1</sup>, Lelia Duley<sup>2</sup>, Alan Montgomery<sup>2</sup>, Kylie E Hunter<sup>1</sup>, Angie Barba<sup>1</sup>, Ava Grace Tan-Koay<sup>1</sup>, Lisa Askie<sup>1</sup>

**Trialists:** Amir Kugelman<sup>3</sup>, Anu George<sup>4</sup>, Anu Sachdeva<sup>5</sup>, Anup Katheria<sup>6</sup>, Arjan Te Pas<sup>7</sup>, Ashish Kc<sup>8</sup>, Bimlesh Kumar<sup>9</sup>, Carl Backes<sup>10</sup>, Catalina De Paco Matallana<sup>11</sup>, Chamnan Tanprasertkul<sup>12</sup>, Chayatat Ruangkit<sup>13</sup>, Eugene Dempsey<sup>14</sup>, G Ram Mohan<sup>15</sup>, Guillermo Carroli<sup>16</sup>, Heidi Al-Wassia<sup>17</sup>, Hytham Atia<sup>18</sup>, Heike Rabe<sup>19</sup>, Islam Nour<sup>20</sup>, Jiangqin Liu<sup>21</sup>, John Bauer<sup>22</sup>, John Kattwinkel<sup>23</sup>, Judith Mercer<sup>24</sup>, Justin Josephsen<sup>25</sup>, Karen Fairchild<sup>23</sup>, Kellie Murphy<sup>26</sup>, Kristy Robledo<sup>1</sup>, Lakhbir Dhaliwal<sup>15</sup>, Laura Perretta<sup>27</sup>, Lin Ling<sup>28</sup>, Manoj Varanattu<sup>29</sup>, Maria Goya<sup>30</sup>, Musa Silahli<sup>31</sup>, Neelam Kler<sup>32</sup>, Neil Finer<sup>33</sup>, Ola Andersson<sup>8</sup>, Omar Kamlin<sup>34</sup>, Peter Giannone<sup>22</sup>, Pharuhad Pongmee<sup>35</sup>, Prisana Panichkul<sup>36</sup>, Sandeep Kadam<sup>37</sup>, Sangkae Chamnanvanakij<sup>36</sup>, Shigeharu Hosono<sup>38</sup>, Shiraz Badurdeen<sup>34</sup>, Thomas Ranjit<sup>39</sup>, Venkataseshan Sundaram<sup>15</sup>, Victor Lago Leal<sup>40</sup>, Vikram Datta<sup>41</sup>, Waldemar Carlo<sup>42</sup>, Walid El-Naggar<sup>43</sup>, William Tarnow-Mordi<sup>1</sup>, William Oh<sup>44</sup>

**Advisers:** Graeme Polglase<sup>45</sup>, John Simes<sup>1</sup>, Martin Kluckow<sup>46</sup>, Peter Davis<sup>34</sup>, Stuart Hooper<sup>45</sup>, Thomas P.A. Debray<sup>47</sup>.

<sup>1</sup> National Health and Medical Research Council Clinical Trials Centre, University of Sydney, Sydney, Australia

<sup>2</sup> Nottingham Clinical Trials Unit, University of Nottingham, Nottingham, UK

<sup>3</sup> Bnai Zion Medical Center, Haifa, Israel

<sup>4</sup> Malankara Orthodox Syrian Church Medical College, Kerala, India

<sup>5</sup> All India Institute of Medical Science, New Delhi, India

<sup>6</sup> Sharp Healthcare, San Diego, California, USA

<sup>7</sup> Leiden University, Leiden, Netherlands

<sup>8</sup> Uppsala University, Uppsala, Sweden

<sup>9</sup> Lala Lajpat Rai Memorial Medical College, Uttar Pradesh, India

<sup>10</sup> Ohio State University Wexner Medical Center, Columbus, Ohio, USA

<sup>11</sup> Clinic University Hospital Virgen de la Arrixaca, Murcia, Spain

<sup>12</sup> Thammasat University, Pathumthani, Thailand

<sup>13</sup> Mahidol University, Samut Prakan, Thailand

<sup>14</sup> Cork University Maternity Hospital, Cork, Ireland

<sup>15</sup> Post Graduate Institute of Medical Education & Research, Chandigarh, India

<sup>16</sup> Rosarino Center for Perinatal Studies, Rosario, Argentina

<sup>17</sup> King Abdulaziz University, Jeddah, Saudi Arabia

<sup>18</sup> Zagazig University, Zagazig, Egypt

<sup>19</sup> Brighton and Sussex Medical School, University of Sussex, Brighton, UK

<sup>20</sup> Mansoura University Children's Hospital, Mansoura, Egypt

<sup>21</sup> Tongji University School of Medicine, Shanghai, China

<sup>22</sup> University of Kentucky, Lexington, Kentucky, USA

<sup>23</sup> University of Virginia, Charlottesville, Virginia, USA

<sup>24</sup> The University of Rhode Island, Kingston, Rhode Island, USA

<sup>25</sup> St Louis University School of Medicine, St. Louis, Missouri, USA

- 1  
2  
3 <sup>26</sup> Mount Sinai Hospital, Toronto, Canada  
4 <sup>27</sup> Weill Cornell Medical College, New York City, New York, USA  
5  
6 <sup>28</sup> Suining Central Hospital, Sichuan, China  
7 <sup>29</sup> Jubilee Mission Medical College & Research Centre, Kerala, India  
8 <sup>30</sup> Vall d'Hebron University Hospital, Barcelona, Spain  
9  
10 <sup>31</sup> Baskent University, Ankara, Turkey  
11 <sup>32</sup> Sir Ganga Ram Hospital, New Delhi, India  
12 <sup>33</sup> University of California, San Diego, California, USA  
13 <sup>34</sup> The Royal Women's Hospital, Melbourne, Australia  
14 <sup>35</sup> Ramathibodi Hospital, Mahidol University, Bangkok, Thailand  
15 <sup>36</sup> Phramongkutklao Hospital, Ratchathewi, Bangkok, Thailand  
16 <sup>37</sup> KEM Hospital, Pune, Maharashtra, India  
17 <sup>38</sup> Jichi Medical University Saitama Medical Center, Saitama, Japan  
18 <sup>39</sup> St John's Medical College & Hospital, Bangalore, Kamataka, India  
19 <sup>40</sup> University Hospital of Getafe & European University of Madrid, Madrid, Spain  
20 <sup>41</sup> Lady Hardinge Medical College, New Delhi, India  
21 <sup>42</sup> University of Alabama at Birmingham, Birmingham, Alabama, USA  
22 <sup>43</sup> Department of Pediatrics, Dalhousie University, Halifax, Canada  
23 <sup>44</sup> Women and Infants' Hospital, Providence, Rhode Island, USA  
24 <sup>45</sup> The Ritchie Centre, Obstetrics & Gynaecology, Monash University, Melbourne, Australia  
25 <sup>46</sup> Faculty of Medicine and Health, University of Sydney, Sydney, Australia  
26 <sup>47</sup> Julius Center for Health Sciences and Primary Care, University Medical Center Utrecht, Utrecht, the  
27  
28  
29  
30  
31  
32  
33  
34  
35  
36  
37  
38  
39  
40  
41  
42  
43  
44  
45  
46  
47  
48  
49  
50  
51  
52  
53  
54  
55  
56  
57  
58  
59  
60

## References

1. Blencowe H, Cousens S, Oestergaard MZ, Chou D, Moller AB, Narwal R, et al. National, regional, and worldwide estimates of preterm birth rates in the year 2010 with time trends since 1990 for selected countries: a systematic analysis and implications. *Lancet*. 2012;379(9832):2162-72.
2. March of Dimes P, Save the Children, WHO. Born too soon: the global action report on preterm birth. Geneva: World Health Organisation; 2012.
3. Chang HH, Larson J, Blencowe H, Spong CY, Howson CP, Cairns-Smith S, et al. Preventing preterm births: analysis of trends and potential reductions with interventions in 39 countries with very high human development index. *Lancet*. 2013;381(9862):223-34.
4. Petrou S, Mehta Z, Hockley C, Cook-Mozaffari P, Henderson J, Goldacre M. The impact of preterm birth on hospital inpatient admissions and costs during the first 5 years of life. *Pediatrics*. 2003;112(6 Pt 1):1290-7.
5. Mangham LJ, Petrou S, Doyle LW, Draper ES, Marlow N. The cost of preterm birth throughout childhood in England and Wales. *Pediatrics*. 2009;123(2):e312-27.
6. Zeitlin J, Draper ES, Kollee L, Milligan D, Boerch K, Agostino R, et al. Differences in rates and short-term outcome of live births before 32 weeks of gestation in Europe in 2003: results from the MOSAIC cohort. *Pediatrics*. 2008;121(4):e936-44.
7. Bhutta AT, Cleves MA, Casey PH, Cradock MM, Anand KJS. Cognitive and Behavioral Outcomes of School-Aged Children Who Were Born Preterm: A Meta-analysis. *JAMA*. 2002;288(6):728-37.
8. Aarnoudse-Moens CS, Weisglas-Kuperus N, van Goudoever JB, Oosterlaan J. Meta-analysis of neurobehavioral outcomes in very preterm and/or very low birth weight children. *Pediatrics*. 2009;124(2):717-28.
9. Anderson P, Doyle LW. Neurobehavioral outcomes of school-age children born extremely low birth weight or very preterm in the 1990s. *JAMA*. 2003;289(24):3264-72.
10. International Liaison Committee on Resuscitation (ILCOR). Neonatal Resuscitation- Part 7. 2015 International Consensus on Cardiopulmonary Resuscitation and Emergency Cardiovascular Care Science with Treatment Recommendations. In: Perlman JM, Wyllie J & Kattwinkel et al. *Circulation*. 2015;132(suppl 1):S204-S41.
11. Farrar D, Airey R, Law GR, Tuffnell D, Cattle B, Duley L. Measuring placental transfusion for term births: weighing babies with cord intact. *BJOG*. 2011;118(1):70-5.
12. Boere I, Roest A, E W, ten Harkel A, Haak M, Morley C, et al. Umbilical blood flow patterns directly after birth before delayed cord clamping. *Arch Dis Child Fetal Neonatal Ed*. 2015;100:F121-F125. doi:10.1136/archdischild-2014-307144.
13. Yao A, Moinian M, Lind J. Distribution of blood between infant and placenta after birth. *The Lancet*. 1969;294(7626):871-3.
14. Saigal S, O'Neill A, Surainder Y, Chua LB, Usher R. Placental transfusion and hyperbilirubinemia in the premature. *Pediatrics*. 1972;49(3):406-19.
15. Dawes GS. Foetal and neonatal physiology; a comparative study of the changes at birth [by] Geoffrey S. Dawes. Chapter 13: Chicago, Year Book Medical Publishers; 1968. 247 p. illus. 27 cm. p.
16. Fogarty M, Osborn DA, Askie L, Seidler AL, Hunter K, Lui K, et al. Delayed vs early umbilical cord clamping for preterm infants: a systematic review and meta-analysis. *American Journal of Obstetrics and Gynecology*. 2018;218(1):1-18.
17. Vijayaselvi R, Abraham A, Kumar M, Kuruvilla A, Mathews J, Duley L. Measuring umbilical flow and placental transfusion for preterm births: weighing babies at 33-36 weeks gestation with cord intact. 1st congress of joint European Neonatal Societies. 2015.
18. Committee Opinion No. 684: Delayed Umbilical Cord Clamping After Birth. *Obstetrics & Gynecology*. 2017;129(1):e5-e10.
19. Schoonakker B, Dorling, J., Oddie, S., Batra, D., Grace, N., Duley, L, editor Bedside resuscitation of preterm infants with cord intact is achievable using standard resuscitaire. Available at



1  
2  
3 p430 of

4 [https://www.eiseverywhere.com/file\\_uploads/9206db9fe962868d47f709b38365ec5e\\_9349\\_abstract](https://www.eiseverywhere.com/file_uploads/9206db9fe962868d47f709b38365ec5e_9349_abstract_book_-_25sett13-it-it.pdf)

5 [book - 25sett13-it-it.pdf](https://www.eiseverywhere.com/file_uploads/9206db9fe962868d47f709b38365ec5e_9349_abstract_book_-_25sett13-it-it.pdf). European Society for Pediatric Research; 2013; Oporto, Portugal.

6 20. Thomas M, Yoxall C, Weeks A, Duley L. Providing newborn resuscitation at the mother's  
7 bedside: assessing the safety, usability and acceptability of a mobile trolley. *BMC Pediatrics*.

8 2014;14:135.

9 21. Duley L, Dorling J, Pushpa-Rajah A, Oddie SJ, Yoxall CW, Schoonakker B, et al. Randomised trial  
10 of cord clamping and initial stabilisation at very preterm birth. *Archives of Disease in Childhood - Fetal*  
11 *and Neonatal Edition*. 2018;103(1):F6-F14.

12 22. Sawyer A, Ayers S, Bertullies S, Thomas M, Weeks AD, Yoxall CW, et al. Providing immediate  
13 neonatal care and resuscitation at birth beside the mother: parents' views, a qualitative study. *BMJ*  
14 *Open*. 2015;5(9).

15 23. Yoxall CW, Ayers S, Sawyer A, Bertullies S, Thomas M, D Weeks A, et al. Providing immediate  
16 neonatal care and resuscitation at birth beside the mother: clinicians' views, a qualitative study. *BMJ*  
17 *Open*. 2015;5(9).

18 24. Schoonakker B, . Dorling, J., Oddie, S., Batra, D., Grace, N., Duley, L. Bedside resuscitation of  
19 preterm infants with cord intact is achievable using standard resuscitaire. Available at p430 of  
20 [https://www.eiseverywhere.com/file\\_uploads/9206db9fe962868d47f709b38365ec5e\\_9349\\_abstract](https://www.eiseverywhere.com/file_uploads/9206db9fe962868d47f709b38365ec5e_9349_abstract_book_-_25sett13-it-it.pdf)  
21 [book - 25sett13-it-it.pdf](https://www.eiseverywhere.com/file_uploads/9206db9fe962868d47f709b38365ec5e_9349_abstract_book_-_25sett13-it-it.pdf). European Society for Pediatric Research. 2013.

22 25. Kluckow M, Hooper SB. Using physiology to guide time to cord clamping. *Seminars in Fetal and*  
23 *Neonatal Medicine*. 2015;20(4):225-31.

24 26. Bhatt S, Alison BJ, Wallace EM, Crossley KJ, Gill AW, Kluckow M, et al. Delaying cord clamping  
25 until ventilation onset improves cardiovascular function at birth in preterm lambs. *The Journal of*  
26 *physiology*. 2013;591(8):2113-26.

27 27. Ersdal HL, Linde J, Mduma E, Auestad B, J P. Neonatal outcome following cord clamping after  
28 onset of spontaneous respiration. *Pediatrics*. 2014;134:265-72.

29 28. Nevill E, MP M. Effect of delayed cord clamping (DCC) on breathing and transition at birth in  
30 very preterm infants. *Early Hum Dev* 2015;91:407-11.

31 29. Polglase GR, Dawson JA, Kluckow M, Gill AW, Davis PG, te Pas AB, et al. Ventilation Onset Prior  
32 to Umbilical Cord Clamping (Physiological-Based Cord Clamping) Improves Systemic and Cerebral  
33 Oxygenation in Preterm Lambs. *PLOS ONE*. 2015;10(2):e0117504.

34 30. Polglase GR, Blank DA, Barton SK, Miller SL, Stojanovska V, Kluckow M, et al. Physiologically  
35 based cord clamping stabilises cardiac output and reduces cerebrovascular injury in asphyxiated near-  
36 term lambs. *Arch Dis Child Fetal Neonatal Ed*. 2017;<https://doi.org/10.1136/archdischild-2017-313657>  
37 [Epub ahead of print].

38 31. Katheria AC, Brown MK, Faksh A, Hassen KO, Rich W, Lazarus D, et al. Delayed Cord Clamping  
39 in Newborns Born at Term at Risk for Resuscitation: A Feasibility Randomized Clinical Trial. *The Journal*  
40 *of Pediatrics*. 2017;187:313-7.e1.

41 32. Katheria A, Poeltler D, Durham J, Steen J, Rich W, Arnell K, et al. Neonatal Resuscitation with  
42 an Intact Cord: A Randomized Clinical Trial. *Journal of Pediatrics*. 2016;178:75-80.e3.

43 33. Hosono S, Mugishima H, Fujita H, Hosono A, Minato M, Okada T, et al. Umbilical cord milking  
44 reduces the need for red cell transfusions and improves neonatal adaptation in infants born at less  
45 than 29 weeks' gestation: a randomised controlled trial. *Arch Dis Child Fetal Neonatal Ed*.  
46 2008;93(1):F14-9.

47 34. Blank DA, Polglase GR, Kluckow M, Gill AW, Crossley KJ, Moxham A, et al. Haemodynamic  
48 effects of umbilical cord milking in premature sheep during the neonatal transition. *Archives of*  
49 *Disease in Childhood - Fetal and Neonatal Edition*. 2017.

50 35. Katheria AC, Reister F, Hummler H, Essers J, Mendler M, Truong G, et al. LB 1: Premature  
51 Infants Receiving Cord Milking or Delayed Cord Clamping: A Randomized Controlled Non-inferiority  
52 Trial. *American Journal of Obstetrics & Gynecology*. 2019;220(1):S682.

- 1
- 2
- 3 36. WHO. WHO Recommendations for the Prevention and Treatment of Postpartum
- 4 Haemorrhage. Geneva: World Health Organization. 2012.
- 5 37. National Institute for Health and Care Excellence. Preterm labour and birth. London; 2015.
- 6 38. European Resuscitation Council Guidelines for Resuscitation 2015 Section 7. Resuscitation and
- 7 support of transition of babies at birth.
- 8 39. World Health Organisation. Guideline: delayed umbilical cord clamping for improved maternal
- 9 and infant health and nutrition outcomes. Geneva, Switzerland; 2014.
- 10 40. Rabe H, Diaz-Rossello JL, Duley L, Dowswell T. Effect of timing of umbilical cord clamping and
- 11 other strategies to influence placental transfusion at preterm birth on maternal and infant outcomes.
- 12 Cochrane Database Syst Rev. 2012;8:CD003248.
- 13 41. Hosono S, Mugishima H, Fujita H, Hosono A, Minato M, Okada T, et al. Umbilical cord milking
- 14 reduces the need for red cell transfusions and improves neonatal adaptation in infants born at less
- 15 than 29 weeks' gestation: a randomised controlled trial. Arch Dis Child Fetal Neonatal Ed.
- 16 2008;93(1):F14-9.
- 17 42. Stewart LA, Tierney JF, Clarke M, on behalf of the Cochrane Individual Patient Data Meta-
- 18 analysis Methods Group. Chapter 18: Reviews of individual patient data. In: Higgins J, Green S, editors.
- 19 Cochrane Handbook for Systematic Reviews of Interventions: Version 5.1.0 [updated March 2011]. The
- 20 Cochrane Collaboration, 2011. Available: [www.cochrane-handbook.org](http://www.cochrane-handbook.org).
- 21 43. Caldwell DM, Ades AE, Higgins JP. Simultaneous comparison of multiple treatments:
- 22 combining direct and indirect evidence. Bmj. 2005;331(7521):897-900.
- 23 44. Lumley T. Network meta-analysis for indirect treatment comparisons. Statistics in medicine.
- 24 2002;21(16):2313-24.
- 25 45. Sutton A, Ades AE, Cooper N, Abrams K. Use of indirect and mixed treatment comparisons for
- 26 technology assessment. PharmacoEconomics. 2008;26(9):753-67.
- 27 46. Debray TP, Schuit E, Efthimiou O, Reitsma JB, Ioannidis JP, Salanti G, et al. An overview of
- 28 methods for network meta-analysis using individual participant data: when do benefits arise?
- 29 Statistical methods in medical research. 2018;27(5):1351-64.
- 30 47. Gherzi D, Berlin J, Askie L. Chapter 19: Prospective meta-analysis. In: Higgins J, Green S,
- 31 editors. Cochrane Handbook for Systematic Reviews of Interventions: Version 5.1.0 [updated March
- 32 2011]. The Cochrane Collaboration, 2011. Available: [www.cochrane-handbook.org](http://www.cochrane-handbook.org).
- 33 48. Higgins J, Deeks J, Altman D. Ch. 16.6: Indirect comparisons and multiple-treatments meta-
- 34 analysis. Cochrane Handbook for Systematic Reviews of Interventions: Cochrane Collaboration; 2011.
- 35 49. Chaimani A, Caldwell DM, Li T, Higgins JP, Salanti G. Additional considerations are required
- 36 when preparing a protocol for a systematic review with multiple interventions. Journal of clinical
- 37 epidemiology. 2017;83:65-74.
- 38 50. Moher D, Shamseer L, Clarke M, Gherzi D, Liberati A, Petticrew M, et al. Preferred reporting
- 39 items for systematic review and meta-analysis protocols (PRISMA-P) 2015 statement. Systematic
- 40 reviews. 2015;4(1):1.
- 41 51. Stewart LA, Clarke M, Rovers M, Riley RD, Simmonds M, Stewart G, et al. Preferred Reporting
- 42 Items for a Systematic Review and Meta-analysis of Individual Participant Data: The PRISMA-IPD
- 43 StatementPRISMA Extension for Individual Patient DataPRISMA Extension for Individual Patient Data.
- 44 JAMA. 2015;313(16):1657-65.
- 45 52. CPaCG. Detailed search methods used to maintain and update the Specialised Register
- 46 [Available from:
- 47 [https://pregnancy.cochrane.org/sites/pregnancy.cochrane.org/files/public/uploads/Cochrane%20Preg](https://pregnancy.cochrane.org/sites/pregnancy.cochrane.org/files/public/uploads/Cochrane%20Pregnancy%20and%20Childbirth%20Group%20search%20methods%20for%20Intervention%20reviews_0.pdf)
- 48 [nancy%20and%20Childbirth%20Group%20search%20methods%20for%20Intervention%20reviews\\_0.p](https://pregnancy.cochrane.org/sites/pregnancy.cochrane.org/files/public/uploads/Cochrane%20Pregnancy%20and%20Childbirth%20Group%20search%20methods%20for%20Intervention%20reviews_0.pdf)
- 49 [df](https://pregnancy.cochrane.org/sites/pregnancy.cochrane.org/files/public/uploads/Cochrane%20Pregnancy%20and%20Childbirth%20Group%20search%20methods%20for%20Intervention%20reviews_0.pdf) last accessed July 31, 2018.
- 50 53. Higgins J, Green S. Cochrane handbook for systematic reviews of interventions. Oxford: Wiley-
- 51 Blackwell; 2008.
- 52
- 53
- 54
- 55
- 56
- 57
- 58
- 59
- 60

- 1  
2  
3 54. Guyatt G, Oxman AD, Akl EA, Kunz R, Vist G, Brozek J, et al. GRADE guidelines: 1.  
4 Introduction—GRADE evidence profiles and summary of findings tables. *Journal of clinical*  
5 *epidemiology*. 2011;64(4):383-94.  
6 55. Salanti G, Higgins JP, Ades A, Ioannidis JP. Evaluation of networks of randomized trials.  
7 *Statistical Methods in Medical Research*. 2008;17(3):279-301.  
8 56. R Core Team. *R: A language and environment for statistical computing*. 2013.  
9 57. Riley RD, Steyerberg EW. Meta-analysis of a binary outcome using individual participant data  
10 and aggregate data. *Research Synthesis Methods*. 2010;1(1):2-19.  
11 58. Veroniki AA, Vasiliadis HS, Higgins JP, Salanti G. Evaluation of inconsistency in networks of  
12 interventions. *International journal of epidemiology*. 2013;42(1):332-45.  
13 59. Peters JL, Sutton AJ, Jones DR, Abrams KR, Rushton L. Contour-enhanced meta-analysis funnel  
14 plots help distinguish publication bias from other causes of asymmetry. *Journal of clinical*  
15 *epidemiology*. 2008;61(10):991-6.  
16 60. Schulz KF, Grimes DA. Multiplicity in randomised trials I: endpoints and treatments. *Lancet*  
17 (London, England). 2005;365(9470):1591-5.  
18 61. Schulz KF, Grimes DA. Multiplicity in randomised trials II: subgroup and interim analyses.  
19 *Lancet* (London, England). 2005;365(9471):1657-61.  
20  
21  
22  
23  
24  
25  
26  
27  
28  
29  
30  
31  
32  
33  
34  
35  
36  
37  
38  
39  
40  
41  
42  
43  
44  
45  
46  
47  
48  
49  
50  
51  
52  
53  
54  
55  
56  
57  
58  
59  
60

1  
2  
3 **Figure headings**  
4

5 Figure 1. Network of possible comparisons between cord management interventions  
6

7 Figure 2. Illustration of network of currently available trials comparing different timing of cord  
8 clamping.  
9  
10  
11  
12  
13  
14  
15  
16  
17  
18  
19  
20  
21  
22  
23  
24  
25  
26  
27  
28  
29  
30  
31  
32  
33  
34  
35  
36  
37  
38  
39  
40  
41  
42  
43  
44  
45  
46  
47  
48  
49  
50  
51  
52  
53  
54  
55  
56  
57  
58  
59  
60

For peer review only

1  
2  
3  
4  
5  
6  
7  
8  
9  
10  
11  
12  
13  
14  
15  
16  
17  
18  
19  
20

Medium deferral of cord clamping (≥45 to <90 seconds) without milking

Long deferral of cord clamping (≥90 seconds) without milking

Cord milking or stripping before immediate cord clamping

Cord milking or stripping before deferred cord clamping

Immediate cord clamping without milking (≤15 seconds or trialist defined)

Physiological clamping (clamping after aeration of lungs)

Cord milking or stripping after deferred cord clamping

Cord milking or stripping after immediate cord clamping

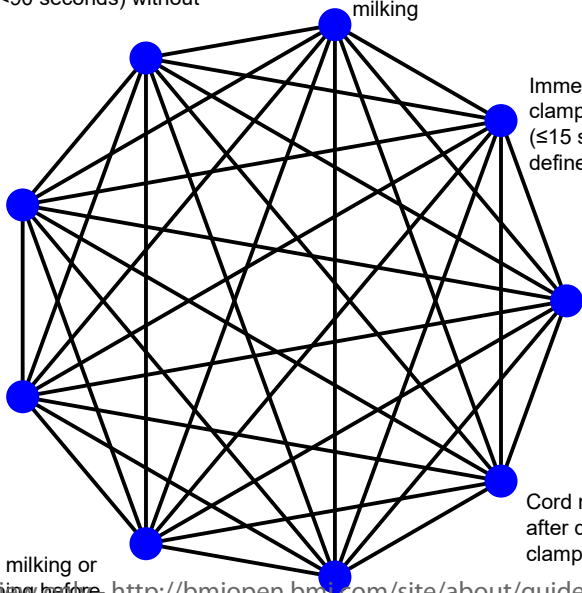

Long deferral of cord clamping  
(≥ 90 seconds) without milking

Medium deferral of cord clamping  
(≥45 to <90 seconds) without milking

Short deferral of cord clamping  
(>15 to <45 seconds) without milking

Cord milking  
before immediate  
cord clamping

Immediate cord  
clamping  
without milking

Cord milking after  
immediate cord clamping

Cord milking before  
deferred cord clamping

Cord milking after deferred  
cord clamping

Physiological cord clamping  
(after onset of breathing)

1  
2  
3  
4  
5  
6  
7  
8  
9  
10  
11  
12  
13  
14  
15  
16  
17  
18  
19  
20

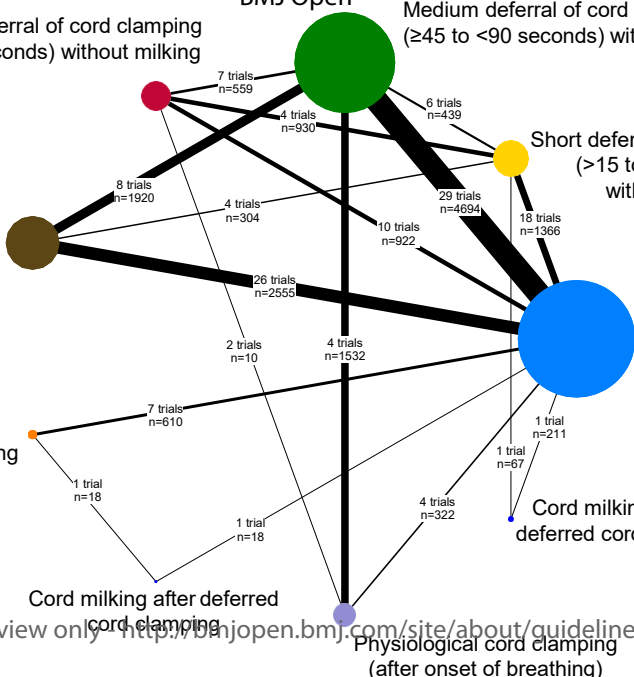

## iCOMP Trial Master List September 2019

This table shows all trials that we have identified to date as being eligible for inclusion in iCOMP. All trials that have already agreed to provide their data are marked in blue.

**Supplementary File 1:** Eligible randomised trials to date for the pairwise & network meta-analysis with individual participant data on Cord Management at Preterm Birth (iCOMP)

| Trial Country (PI)                      | Publication year                               | Start year/ completion year | Sample size              | Participants                                            | Intervention                                                                                                                                                                                                  | Comparator                         | Primary outcome/s                                    |
|-----------------------------------------|------------------------------------------------|-----------------------------|--------------------------|---------------------------------------------------------|---------------------------------------------------------------------------------------------------------------------------------------------------------------------------------------------------------------|------------------------------------|------------------------------------------------------|
| Argentina [1]<br>(Carroli)              | n/a                                            | 2016/2020                   | 700                      | Singletons, 24-30 <sup>6</sup><br>weeks' GA             | DCC: at 90 sec                                                                                                                                                                                                | DCC: ~30 sec                       | Sepsis (proven and very probable)                    |
| Australia [2]<br>(Badurdeen)            | n/a                                            | 2018/2020                   | 120 (not all<br>preterm) | ≥32 weeks' GA*,<br>require resuscitation<br>at delivery | DCC: resuscitation prior to<br>cord clamping (for PPV,<br>clamping delayed until at<br>least 60 sec after colour<br>change of pedicap/neostat;<br>for CPAP, clamping occurs at<br>least 2 min after delivery) | ICC (followed by<br>resuscitation) | Average heart rate between<br>60-120 sec after birth |
| Australia [3]<br>(McDonnell)            | 1997                                           | 1994/1994                   | 46                       | 26 to 33 weeks' GA                                      | DCC: 30 sec                                                                                                                                                                                                   | ICC                                | Venous haematocrit                                   |
| Australia [4]<br>(Kamlin)               | n/a                                            | 2014/2015                   | 27 (not all<br>preterm)  | 32-42 weeks' GA*                                        | Arm 1: DCC at 90-180 sec<br>Arm 2: DCC 10 sec after<br>crying and breathing<br>established                                                                                                                    | DCC: <60 sec                       | Heart rate 90 sec after birth                        |
| Australia [5]<br>(Tarnow-Mordi<br>2009) | n/a<br>(Pilot for<br>Tarnow-<br>Mordi<br>2017) | 2009/2010                   | 100                      | <32 weeks' GA                                           | Arm 1: Cord milking during<br>resuscitation - cord cut long<br>(3cm from placenta/<br>introitus)<br>Arm 2: DCC at 30-60 sec. If<br>baby in extremis, immediate<br>clamping.                                   | ICC: within 10 sec                 | Haemoglobin 6 hours after<br>birth                   |

| Trial Country (PI)                | Publication year | Start year/ completion year | Sample size          | Participants                                                                                                            | Intervention                                                                   | Comparator                               | Primary outcome/s                                                                                                                                                                                                                  |
|-----------------------------------|------------------|-----------------------------|----------------------|-------------------------------------------------------------------------------------------------------------------------|--------------------------------------------------------------------------------|------------------------------------------|------------------------------------------------------------------------------------------------------------------------------------------------------------------------------------------------------------------------------------|
|                                   |                  |                             |                      |                                                                                                                         | Arm 3: DCC at 30-60 sec + milking                                              |                                          |                                                                                                                                                                                                                                    |
| Australia [6] (Tarnow-Mordi 2017) | 2017             | 2010/2017                   | 1634                 | <30 weeks' GA                                                                                                           | DCC: ≥60 sec                                                                   | ICC within 10 sec                        | Composite: Death or major morbidity (severe brain injury, severe ROP, NEC, or late onset sepsis) at 36 weeks' PMA                                                                                                                  |
| Austria [7] (Urlesberger)         | n/a              | 2018/2021                   | 80 (not all preterm) | ≥28 weeks' GA*, caesarean                                                                                               | DCC: <30 sec, cord milking after long clamping at 30cm, 1x 10cm/sec            | Standard care (cord cutting, no milking) | Changes in cerebral blood volume within 15 min after birth                                                                                                                                                                         |
| Bangladesh [8] (Yasmeen)          | 2014             | 2012/2013                   | 40                   | <37 weeks' GA                                                                                                           | DCC: 3 minutes                                                                 | DCC: 1 minute                            | Haemoglobin, iron and ferritin                                                                                                                                                                                                     |
| Canada [9] (Chu/Murphy)           | n/a              | 2007/2010                   | 296                  | Singletons, 24-32 weeks' GA                                                                                             | DCC: at 30-45 sec                                                              | ICC                                      | Composite: IVH or late onset sepsis                                                                                                                                                                                                |
| Canada [10] (El-Naggar)           | 2018             | 2011/2014                   | 73                   | 24-30 <sup>6</sup> weeks' GA                                                                                            | UCM: x3, at or below the level of the placenta, ~20 cm milked, before clamping | ICC                                      | Systemic blood flow (Superior vena cava flow at 4-6 hours after birth)                                                                                                                                                             |
| Canada [11] (Saigal)**            | 1972             | n/a                         | 125 (preterm)        | Premature infants 28-36 weeks GA and weighing 1020g-3250g OR full-term infants 28-42 weeks GA and weighing 2685g-4350g* | Arm 1: DCC at 1min<br>Arm 2: DCC at 5min                                       | ICC                                      | RBC volume, blood volume, haematocrit, plasma volume                                                                                                                                                                               |
| China [12] (Dai)                  | 2014             | n/a                         | 52 (preterm)         | Singletons, term and preterm infants*                                                                                   | DCC: Wait until cord pulsation ceased                                          | ICC: 5-10 sec                            | RBC count (72-96 hrs after birth), Anaemia (2 wks), clinically significant pathological polycythaemia, white blood cell count (72-96 hrs after birth), fetal bilirubin from birth to day 5, jaundice within 24 hrs of birth, Apgar |



| Trial Country (PI) | Publication year       | Start year/ completion year | Sample size               | Participants                                                                                                      | Intervention                                                                                                                                                                                             | Comparator                                                                                                   | Primary outcome/s                                                                                         |
|--------------------|------------------------|-----------------------------|---------------------------|-------------------------------------------------------------------------------------------------------------------|----------------------------------------------------------------------------------------------------------------------------------------------------------------------------------------------------------|--------------------------------------------------------------------------------------------------------------|-----------------------------------------------------------------------------------------------------------|
|                    |                        |                             |                           |                                                                                                                   |                                                                                                                                                                                                          |                                                                                                              | (1 min, 5 min), respiratory distress, rectal temperature 5 min after birth, neonate well-being at 1 month |
| China [13] (Dong)  | 2016                   | 2015/2015                   | 90                        | Singletons, <32 weeks' GA                                                                                         | DCC: 45 sec                                                                                                                                                                                              | ICC: <10 sec                                                                                                 | Severe IVH – grades 3 and 4                                                                               |
| China [14] (Hao)   | n/a                    | 2018/2019                   | 48                        | 30-31 <sup>6</sup> weeks' GA                                                                                      | UCM                                                                                                                                                                                                      | DCC                                                                                                          | Cerebral haemodynamics 15 min after birth                                                                 |
| China [15] (Hu)    | 2015 (master's thesis) | n/a                         | 120                       | 28-35 weeks' GA, vaginal birth                                                                                    | Arm 1: DCC at 30 sec<br>Arm 2: DCC at 60 sec<br>Arm 3: DCC at 120 sec                                                                                                                                    | ICC < 10 sec                                                                                                 | Haematocrit and haemoglobin levels at 24 hrs and 1 wk after birth                                         |
| China [16] (Hua)   | 2010?                  | 2009/2011                   | 176 (49 of those preterm) | Any GA*                                                                                                           | <u>Normal birth</u><br>Arm 1: DCC – wait until cord ceases pulsing<br>Arm 2: DCC – at 90 sec<br><u>Asphyxia</u><br>Arm 1: DCC – wait until cord ceases pulsing, resuscitate on bed site with cord intact | <u>Normal birth</u><br>ICC <10 sec<br><u>Asphyxia</u><br>ICC <10 sec, resuscitate after on irradiation table | Haemoglobin 1 month after birth                                                                           |
| China [17] (Li)    | 2018                   | 2017/2017                   | 102                       | delivered vaginally between 28 <sup>0</sup> -36 <sup>6</sup> weeks', and premature prolonged rupture of membranes | UCM: x4 at a speed of 10cm/sec, then clamped                                                                                                                                                             | ICC                                                                                                          | Incidence of certain or probable infection in neonates                                                    |
| China [18] (Liu)   | n/a                    | 2019/2019                   | 948 (not all preterm)     | 34 <sup>0</sup> -38 <sup>6</sup> weeks' GA*, caesarean section                                                    | DCC: 60 sec                                                                                                                                                                                              | ICC: within 10 sec                                                                                           | Rate of respiratory distress within 24 hours after birth                                                  |
| China [19] (Shi)   | 2017                   | n/a                         | 60 preterm (and 460 term) | Single foetus deliveries*                                                                                         | DCC                                                                                                                                                                                                      | ICC: 5-10 sec                                                                                                | Hemoglobin (newborn cord blood & after 24 hrs), neonatal complications, bleeding volume, third labour     |

| Trial Country (PI)       | Publication year | Start year/ completion year | Sample size            | Participants                          | Intervention                                                                                  | Comparator                         | Primary outcome/s                                                                                                                                                                                                   |
|--------------------------|------------------|-----------------------------|------------------------|---------------------------------------|-----------------------------------------------------------------------------------------------|------------------------------------|---------------------------------------------------------------------------------------------------------------------------------------------------------------------------------------------------------------------|
|                          |                  |                             |                        |                                       |                                                                                               |                                    | time, incidence of placental adhesion and peeling                                                                                                                                                                   |
| China [20] (Xie)         | n/a              | 2017/2019                   | 300                    | Singletons, <34 weeks' GA             | UCM: x2-3, 25cm/2 sec, below placenta level, before clamping                                  | ICC                                | Haemoglobin, Haematocrit, and ferritin level at 48 hours                                                                                                                                                            |
| Egypt [21] (Allam)       | n/a              | 2018/2019                   | 210                    | Singletons, 30-34 weeks' GA           | DCC: until cord stops pulsing or 1-2 min                                                      | ICC: <5 sec                        | Fetal haemoglobin, bilirubin, death                                                                                                                                                                                 |
| Egypt [22] (Nour 2017a)  | n/a              | 2017/2019                   | 90                     | <34 weeks' GA                         | UCM: x3 at 10cm/sec, below placenta level, cord held 20-25cm from baby                        | ICC                                | Peripheral venous CD34 at admission                                                                                                                                                                                 |
| Egypt [23] (Nour 2017b)  | n/a              | 2017/2018                   | 90                     | <34 weeks' GA                         | Arm 1: ICC, with placental insufficiency<br>Arm 2: DCC at 60sec, with placental insufficiency | Normal placenta with DCC at 60 sec | Peripheral venous CD34 at admission                                                                                                                                                                                 |
| Germany [24] (Nelle)     | 1998             | n/a                         | 19                     | PT <1500g*, born by caesarean section | DCC: 30 sec, 30 cm below placenta                                                             | ICC                                | Mean Blood Pressure, left ventricular output, mean cerebral blood flow velocity in the arteria carotis interna, haemoglobin, haematocrit, systemic and cerebral haemoglobin transport, systemic vascular resistance |
| Germany [25] (Rabe 2000) | 2000             | 2006/2008                   | 40                     | <33 weeks' GA                         | DCC: 45 sec                                                                                   | DCC: 20 sec                        | Feasibility, effects on post-partal adaption and anaemia of prematurity                                                                                                                                             |
| India [26] (Aghai 2018)  | n/a              | 2018/2020                   | 1400 (not all preterm) | Depressed neonates, 35-42 weeks' GA*  | UCM: x4, 30cm over 2 sec                                                                      | ICC: immediately after birth       | Number of infants with moderate to severe HIE or death                                                                                                                                                              |
| India [27] (Anusha)      | n/a              | 2017/2019                   | 148                    | birth weight <1500g*                  | DCC: 30 sec                                                                                   | ICC: within 10 sec                 | Haemodynamic stability, haematological status, serum ferritin, and requirement of                                                                                                                                   |

| Trial Country (PI)        | Publication year | Start year/ completion year | Sample size           | Participants                                       | Intervention                                                                                                          | Comparator         | Primary outcome/s                                                              |
|---------------------------|------------------|-----------------------------|-----------------------|----------------------------------------------------|-----------------------------------------------------------------------------------------------------------------------|--------------------|--------------------------------------------------------------------------------|
|                           |                  |                             |                       |                                                    |                                                                                                                       |                    | blood transfusion between birth and 6 months of age                            |
| India [28] (Bhriuvanshi)  | n/a              | 2017/2018                   | 236                   | > 28 weeks' GA, requiring resuscitation*           | UCM: x3 towards baby at 10cm/sec, then clamped                                                                        | ICC: within 30 sec | Haemoglobin and haematocrit at birth and 6 weeks of age                        |
| India [29] (Chopra)       | 2018             | 2013/2015                   | 142                   | growth retarded babies (IUGR) $\geq$ 35 weeks' GA* | DCC: 60 sec                                                                                                           | ICC: 10 sec        | Haemoglobin and ferritin levels                                                |
| India [30] (Das/Sundaram) | 2018             | 2012/2013                   | 461                   | 30-33 <sup>6</sup> weeks' GA                       | DCC: 60 sec below placenta. If baby depressed, immediate clamping keeping cord long, milked x2-3 during resuscitation | ICC: within 10 sec | Composite of mortality or abnormal neurological examination at 40 weeks PMA    |
| India [31] (Datta)        | 2017             | 2011/2013                   | 120                   | Singletons, 34-36 <sup>6</sup> weeks' GA           | DCC: at >30-<60 sec                                                                                                   | ICC: <20 sec       | Neurobehavioural Assessment of Preterm Infant at 37 weeks' post-conceptual age |
| India [32] (Dhaliwal)     | 2014             | n/a                         | 300                   | 34-37 weeks' GA                                    | DCC: 60 sec                                                                                                           | ICC: <10 sec       | Risk of neonatal mortality & abnormal neurological examination at 40 weeks' GA |
| India [33] (Dipak)        | 2017             | 2012/2013                   | 78                    | 27-31 <sup>6</sup> weeks' GA                       | Arm 1: DCC: 60 sec<br>Arm 2: DCC: 60 sec with intramuscular ergometrine                                               | ICC: <10 sec       | Hematocrit 4 h after birth                                                     |
| India [34] (George/Isac)  | n/a              | 2017/2018                   | 180 (not all preterm) | Mothers at 34-40 <sup>6</sup> weeks' GA*           | UCM: milking whole length at 10cm/sec x3, then clamped                                                                | ICC                | Infant haemoglobin and haematocrit at 72hrs and 6 weeks                        |
| India [35] (Gupta)        | n/a              | 2018/2020                   | 110                   | <34 weeks' GA                                      | DCC: 30 sec                                                                                                           | ICC                | Ferritin and PCV at 8 weeks                                                    |
| India [36] (Kumar)        | 2015             | 2013/2014                   | 200                   | 32-36 <sup>6</sup> weeks' GA, vaginal or caesarean | UCM: x3, 10cm/sec                                                                                                     | ICC                | Haemoglobin and ferritin at 1.5 months                                         |

| Trial Country (PI)                       | Publication year | Start year/ completion year | Sample size              | Participants                                                                                     | Intervention                                                                       | Comparator                  | Primary outcome/s                                                            |
|------------------------------------------|------------------|-----------------------------|--------------------------|--------------------------------------------------------------------------------------------------|------------------------------------------------------------------------------------|-----------------------------|------------------------------------------------------------------------------|
| India [37]<br>(Ram Mohan)                | 2018             | 2015/2016                   | 60                       | <37 weeks' GA,<br>requiring<br>resuscitation                                                     | UCM: 20-25 cm umbilical<br>cord x3 at 10cm/sec within<br>30 sec of birth           | No milking                  | Haemoglobin and serum<br>ferritin at 6 weeks                                 |
| India [38]<br>(Rana/Agarwal)             | 2018             | 2013/2013                   | 100                      | <34 weeks' GA                                                                                    | DCC: 120 sec                                                                       | ICC: ≤30 sec                | serum total bilirubin and<br>haematocrit levels at 48 hrs<br>and 7 days      |
| India [39]<br>(Ranjit)                   | 2015             | 2010/2010                   | 100                      | 30-36 <sup>6</sup> weeks' GA                                                                     | DCC: >2min                                                                         | ICC                         | Haematocrit and serum<br>ferritin at 6 weeks                                 |
| India [40]<br>(Kumar Mangla/<br>Thukral) | n/a              | 2016/2017                   | 144 (not all<br>preterm) | Late preterm and<br>term neonates*                                                               | Deferred UCM: cord clamped<br>at 60 sec                                            | UCM: Cord milking in 10 sec | Venous haematocrit at 48<br>hours of life                                    |
| India [41]<br>(Upadhyay 2010)            | 2013             | 2010/2011                   | 170 (not all<br>preterm) | >35 weeks' GA*                                                                                   | UCM: x3 at 10cm/sec, then<br>clamped at ~25 cm of length<br>within 30 sec of birth | ICC: <30 sec                | Haemoglobin and serum<br>ferritin at 6 weeks                                 |
| India [42]<br>(Varanattu)                | n/a              | 2018/2019                   | 250                      | <32 weeks' GA                                                                                    | UCM: x3 over 20 sec at<br>20cm/2sec with 2 second<br>pause between                 | ICC: clamped immediately    | Haemoglobin levels at birth<br>and IVH (incidence and<br>severity) at 7 days |
| Iran [43]<br>(Armanian)                  | 2017             | 2014/2015                   | 63                       | ≤34 weeks' GA                                                                                    | DCC: at 30-45 sec                                                                  | ICC: at 5-10 sec            | Time of cord clamping                                                        |
| Iran [44]<br>(Mojaveri)                  | 2017             | 2014/2015                   | 70                       | <32 weeks' GA,<br>caesarean, birth<br>weight < 1500g, not<br>requiring advanced<br>resuscitation | DCC: at 30-45 sec                                                                  | ICC: <10 sec                | IVH (days 3 to 7), survival<br>infant (up to 28 days)                        |
| Iran [45]<br>(Mirzaeian)                 | n/a              | 2017/2018                   | 160                      | 28-34 weeks' GA                                                                                  | UCM: milked x3 in 10 sec                                                           | ICC                         | Amount of transfused blood,<br>bilirubin levels                              |
| Iran [46]<br>(Sekhavat)                  | 2008             | n/a                         | 52                       | 26-34 weeks' GA                                                                                  | DCC: 30-60 sec                                                                     | ICC: 10-15 sec              | Blood pressure, haematocrit,<br>blood glucose                                |

| Trial Country (PI)        | Publication year | Start year/ completion year | Sample size           | Participants                 | Intervention                                                                                                                                             | Comparator                      | Primary outcome/s                                                                                                                                                                                    |
|---------------------------|------------------|-----------------------------|-----------------------|------------------------------|----------------------------------------------------------------------------------------------------------------------------------------------------------|---------------------------------|------------------------------------------------------------------------------------------------------------------------------------------------------------------------------------------------------|
| Iran [47] (Shahgheibi)    | n/a              | 2017/2018                   | 90                    | Women with preterm labour    | DCC: 180 sec                                                                                                                                             | DCC: 30 sec                     | blood parameters, weaning from ventilator, NICU discharge time                                                                                                                                       |
| Ireland [48] (Dempsey)    | n/a              | 2015/2016                   | 45                    | <32 weeks' GA                | Arm 1: DCC at 60 sec on mobile resuscitation trolley at/below placenta level<br>Arm 2: UCM – Cord stripped 3 times at 20cm/2 sec at/below placenta level | ICC: <20 sec                    | Neonatal: Brain activity (6 & 12 hours post-partum, EEG and NIRS)<br>Maternal: hemoglobin at 24-36 hours post-partum                                                                                 |
| Israel [49] (Kugelman)    | 2007             | 2004/2005                   | 65                    | 24-35 <sup>6</sup> weeks' GA | DCC: 30-45 sec, below placenta level                                                                                                                     | ICC: <10 sec                    | Haematocrit, blood pressure                                                                                                                                                                          |
| Japan [50] (Hosono 2008)  | 2008             | 2001/2002                   | 40                    | 24-28 weeks' GA, singletons  | UCM: 20 cm of the cord, x2-3, before clamping, 20cm/2sec                                                                                                 | ICC                             | Probability of not needing transfusion, number of RBC transfusions                                                                                                                                   |
| Japan [51] (Hosono 2016)  | 2016             | 2008/2016                   | 203                   | 24-27 <sup>6</sup> weeks' GA | UCM: cord cut 30 cm from infant, cord milked x1                                                                                                          | ICC: <30 sec                    | 1) Probability needing transfusion and death<br>2) Amount of blood transfusion first 4 weeks                                                                                                         |
| Korea [52] (Song)         | 2017             | 2012/2015                   | 66                    | 24-32 <sup>6</sup> weeks' GA | UCM: x4 at 20cm/2sec, with 2 sec pause between                                                                                                           | ICC: immediately after delivery | Short term safety: Apgar score, prevalence of hypothermia, early intubation, initial blood gas analyses, bilirubin levels, duration of phototherapy, use of cross-transfusion, respiratory distress. |
| Macedonia [53] (Zisovska) | 2008             | n/a                         | 57                    | Premature newborns           | DCC: 1 min                                                                                                                                               | ICC                             | Hematological parameters, number of RBC transfusions                                                                                                                                                 |
| Nepal [54] (Andersson)    | 2017             | 2014/2017                   | 540 (not all preterm) | 34-41 weeks' GA*             | DCC: at ≤180 sec                                                                                                                                         | ICC: ≤30 sec                    | Haemoglobin at 8±1 months                                                                                                                                                                            |

| Trial Country (PI)                  | Publication year | Start year/ completion year | Sample size            | Participants                                             | Intervention                                                                                                                                                    | Comparator                                                                              | Primary outcome/s                                                                                                                                                                   |
|-------------------------------------|------------------|-----------------------------|------------------------|----------------------------------------------------------|-----------------------------------------------------------------------------------------------------------------------------------------------------------------|-----------------------------------------------------------------------------------------|-------------------------------------------------------------------------------------------------------------------------------------------------------------------------------------|
| Nepal [55]<br>(Ashish KC)           | n/a              | 2016/2016                   | 1510 (not all preterm) | Singletons, normal vaginal delivery, $\geq 33$ weeks GA* | DCC: at 180 sec                                                                                                                                                 | DCC: <60 sec                                                                            | Neonatal heart rate continuously until 10 min after birth and at 1,3&5 min                                                                                                          |
| Netherlands [56]<br>(Te Pas)        | n/a              | 2019/2020                   | 660                    | <30 weeks' GA                                            | Physiology-based cord clamping (PBCC): Resuscitation with cord intact, clamp when infant is stable (heart rate >100 bpm, oxygen >80%, supplemental oxygen <40%) | ICC/DCC: immediately or delayed 30-60 sec, depending on clinical condition of infant    | Intact survival at NICU discharge (without cerebral injury (IVH $\geq$ grade 2 and/or PVL $\geq$ grade 2 and/or periventricular venous infarction) and/or NEC (Bell stage $\geq$ 2) |
| Netherlands [57]<br>(Ultee)         | 2008             | n/a                         | 37                     | 34 to 36 <sup>6</sup> weeks' GA                          | DCC: 3 min                                                                                                                                                      | ICC: <30 sec                                                                            | blood glucose levels at 1,2, and 3hrs of age, haemoglobin and haematocrit at 1hr and 10 weeks, ferritin at 10 weeks                                                                 |
| Pakistan [58]<br>(Malik)            | 2013             | 2009-2009                   | 80                     | 30-37 weeks' GA                                          | DCC: 120 sec                                                                                                                                                    | DCC: 30 sec                                                                             | Haematocrit                                                                                                                                                                         |
| Saudi Arabia [59]<br>(Al-Wassia)    | n/a              | 2017/2019                   | 180                    | <32 weeks' GA                                            | UCM: milked 20cm segment over 2-3 sec x3                                                                                                                        | DCC: 60 sec                                                                             | IVH at 28 days                                                                                                                                                                      |
| Saudi Arabia [60]<br>(Gomaa)        | n/a              | 2016/2018                   | 200                    | 24 to 34 <sup>6</sup> weeks' GA                          | DCC: 45-60 sec, baby at level or below placenta                                                                                                                 | UCM: milked x4-5 from maternal end of cord to baby abdomen, 2 sec pause between milking | Haematological parameters - haematocrit                                                                                                                                             |
| South Africa [61]<br>(Hofmeyr 1988) | 1988             | n/a                         | 38                     | Singleton, <35 weeks' GA                                 | Arm 1: DCC at 60sec<br>Arm 2: DCC at 60sec + ergometrine                                                                                                        | ICC                                                                                     | PVH/IVH at 6-72hrs after birth, Apgar score at 5min, birthweight, systolic blood pressure at 5min, cord blood gas and death.                                                        |
| South Africa [62]<br>(Hofmeyr 1993) | 1993             | n/a                         | 86                     | <2000 g birthweight*                                     | DCC: 1-2 min                                                                                                                                                    | ICC                                                                                     | death of the baby, PVH/IVH at 6-72hrs after birth, Apgar                                                                                                                            |

| Trial Country (PI)             | Publication year | Start year/ completion year | Sample size           | Participants                                  | Intervention                                                                        | Comparator         | Primary outcome/s                                                                  |
|--------------------------------|------------------|-----------------------------|-----------------------|-----------------------------------------------|-------------------------------------------------------------------------------------|--------------------|------------------------------------------------------------------------------------|
|                                |                  |                             |                       |                                               |                                                                                     |                    | score at 5min, cord-pH, bilirubin                                                  |
| South Africa [63] (Tiemersma)  | 2015             | 2012/2012                   | 104 (not all preterm) | Birth weight <2500g ± 500g*                   | DCC: 2-3 minutes                                                                    | ICC: within 30 sec | Haemoglobin from cord blood and at 2 months                                        |
| Spain [64] (De Paco Matallana) | n/a              | 2011/2014                   | 100                   | 24- 34 weeks' GA                              | DCC: 45-60 sec                                                                      | ICC: <10 sec       | Neonatal haemoglobin, haematocrit and bilirubin levels (within 7 days after birth) |
| Spain [65] (Domingo Puiggrós)  | n/a              | 2014/2016                   | 40                    | <34 weeks' GA, caesarean                      | UCM: x3 at 20 cm/2sec                                                               | DCC: 30 sec        | Haemoglobin at 1 and 24 hrs                                                        |
| Spain [66] (Leal)              | 2019             | 2013/2016                   | 138                   | 24 <sup>0</sup> -36 <sup>6</sup> weeks' GA    | UCM: nearly 20cm cord milked towards umbilicus x4 before clamping                   | ICC: <20 sec       | Requirement of RBC transfusions or phototherapy                                    |
| Spain [67] (Socias)            | n/a              | 2014/2017                   | 150                   | 26-32 <sup>6</sup> weeks' GA                  | DCC: 30-60 sec                                                                      | ICC: <30sec        | RBC transfusions (number & volume), IVH, postpartum haemorrhage                    |
| Switzerland [68] (Baenziger)   | 2007             | 1996/1997                   | 39                    | 24-32 weeks' GA                               | DCC: 60-90 sec, below placenta, syntocinon                                          | ICC: <20 sec       | Cerebral oxygenation at 4, 24 and 72 hrs of age                                    |
| Taiwan [69] (Shen)             | n/a              | 2015/2019                   | 100                   | <30 weeks' GA                                 | UCM: milked once after ICC, 20cm section at speed of 10cm/sec and clamped at 2-3cm. | ICC and no milking | Neonate's haemoglobin, haematocrit, and mean arterial pressure at admission        |
| Thailand [70] (Chamnanvanakij) | 2017             | 2015/2016                   | 46                    | 25-34 weeks' GA                               | UCM: x3-4, 30 cm, before clamping                                                   | DCC: at 60 sec     | Haematocrit level 2 hrs after birth                                                |
| Thailand [71] (Jomjak)         | n/a              | 2018/2018                   | 110                   | Singleton, 24-36 <sup>6</sup> weeks' GA       | DCC                                                                                 | ICC                | Haematocrit at 2 and 48 hrs                                                        |
| Thailand [72] (Mungkornkaew)   | 2015             | 2014/2014                   | 200 (not all preterm) | Singleton, 34-42 weeks' GA*, vaginal delivery | DCC: 2 minutes                                                                      | DCC: 1 minute      | Fetal haematocrit                                                                  |

| Trial Country (PI)        | Publication year | Start year/ completion year | Sample size | Participants                 | Intervention                                                                                         | Comparator         | Primary outcome/s                                                                                |
|---------------------------|------------------|-----------------------------|-------------|------------------------------|------------------------------------------------------------------------------------------------------|--------------------|--------------------------------------------------------------------------------------------------|
| Thailand [73] (Panichkul) | n/a              | 2015/2016                   | 70          | 34-36 weeks' GA              | DCC: at 60 sec                                                                                       | ICC: at 10 sec     | Haematocrit 2 hours after birth                                                                  |
| Thailand [74] (Ruangkit)  | 2019             | 2016/2017                   | 47          | Multiples, 28-36 weeks' GA   | DCC: at 30-60 sec                                                                                    | ICC: <10 sec       | Haematocrit level at birth                                                                       |
| Thailand [75] (Salae)     | 2016             | 2014/2015                   | 86          | 34-36 <sup>6</sup> weeks' GA | DCC: at 2 minutes                                                                                    | ICC: within 30 sec | Haematocrit at 48 hours                                                                          |
| Thailand [76] (Tanthawat) | n/a              | 2016/2016                   | 40          | <32 weeks' GA                | UCM: Cut cord at 30cm, cord milking x1 at 10cm/sec, clamp and cut cord at 1-2cm from umbilical stump | ICC: <10 sec       | Haemoglobin and haematocrit level at admission                                                   |
| Turkey [77] (Alan)        | 2014             | 2011/2013                   | 44          | ≤32 weeks' GA<br>≤1500 g     | UCM: at 25-30 cm x3 at 5cm/s before clamping                                                         | ICC: <10 sec       | Number and volume of packed RBC transfusions received by infant during first 35 days of life     |
| Turkey [78] (Gokmen)      | 2011             | 2008/2009                   | 42          | 24-31 <sup>6</sup> weeks' GA | DCC: 30-45 sec                                                                                       | ICC: 5-10 sec      | peripheral blood hematopoietic progenitor cells before any blood product administered to infants |
| Turkey [79] (Kilicdag)    | 2015             | 2012/2013                   | 54          | ≤32 weeks' GA                | UCM: x4 before clamping (20cm/2sec)                                                                  | ICC                | absolute neutrophil counts                                                                       |
| Turkey [80] (Silahli)     | 2018             | 2015/2016                   | 75          | ≤32 weeks' GA                | UCM: at 20 cm x3, before clamping                                                                    | ICC: <10 sec       | Thymic size                                                                                      |
| UK [81] (Aladangady)      | 2006             | n/a                         | 46          | 24-32 <sup>6</sup> weeks' GA | DCC: 30-90 sec, below placenta, oxytocic agent, with ventilation/ resuscitation if necessary         | ICC                | Infants' blood volume                                                                            |
| UK [82] (Duley)           | 2018             | 2013/2015                   | 261         | <32 weeks' GA                | DCC: after at least 2 min                                                                            | ICC: <20 sec       | Death before hospital discharge, intraventricular haemorrhage                                    |



| Trial Country (PI)    | Publication year | Start year/ completion year | Sample size           | Participants                                                                               | Intervention                                                                                        | Comparator                                            | Primary outcome/s                                                                                              |
|-----------------------|------------------|-----------------------------|-----------------------|--------------------------------------------------------------------------------------------|-----------------------------------------------------------------------------------------------------|-------------------------------------------------------|----------------------------------------------------------------------------------------------------------------|
| UK (Holland)          | Not published    | 1998/2001                   | ?                     | <33 weeks' gestation                                                                       | DCC: 40-90 s                                                                                        | ICC (?)                                               | Median arterial/alveolar PO2 ratio over the first 24 hrs of life                                               |
| UK [83] (Kinmond)     | 1993             | n/a                         | 36                    | >27 & <32 weeks' GA, vaginal delivery                                                      | DCC: 30 sec, 20 cm below placenta                                                                   | ICC: 10 sec median                                    | Initial packed cell volume, peak serum bilirubin concentrations, red cell transfusions, respiratory impairment |
| England [84] (Medina) | 2013             | n/a                         | 51                    | 24-31 weeks' GA                                                                            | DCC                                                                                                 | ICC                                                   | Haemodynamic parameters, included vena cava blood flow, ventricular outflow, and flow velocity.                |
| UK [85] (Rabe)        | 2011             | 2006/2008                   | 58                    | Singleton, <34 weeks' GA                                                                   | UCM: x4                                                                                             | DCC: at 30 sec                                        | neonatal blood haematocrit and haemoglobin at 1 hr after birth                                                 |
| USA [86] (Backes)     | 2016             | 2009/2013                   | 40                    | Singletons, 22 <sup>5</sup> -27 <sup>6</sup> weeks' GA                                     | DCC: 30-45 sec, below placenta                                                                      | ICC: <10 sec                                          | Safety, feasibility, haematological and circulatory outcomes                                                   |
| USA [87] (Bauer)      | n/a              | 2014/2019                   | 300                   | >24 and <30 weeks' GA                                                                      | Arm 1: DCC at 45 sec and indomethacin within 6 hrs<br>Arm 2: DCC at 45 sec and placebo within 6 hrs | Arm 3: ICC and indomethacin<br>Arm 4: ICC and placebo | Fraction of survivors with no severe IVH (grades 3 or 4) or PVL within first 60 days of life                   |
| USA [88] (Berens)     | n/a              | 2018/2019                   | 100 (not all preterm) | ≥35 weeks GA*, at least 1 previous child that received phototherapy for hyperbilirubinemia | DCC: 60 sec                                                                                         | ICC: <15 sec                                          | Neonatal bilirubin level 24 hours after birth                                                                  |
| USA [89] (Bienstock)  | n/a              | 2011/2013                   | 22                    | 24 <sup>0</sup> -32 <sup>6</sup> weeks' GA                                                 | UCM: x4 over 10 min                                                                                 | ICC                                                   | Haemoglobin within 24 hours of birth and through NICU stay                                                     |

| Trial Country (PI)            | Publication year | Start year/ completion year | Sample size | Participants                                                      | Intervention                                                                          | Comparator           | Primary outcome/s                                                                                                          |
|-------------------------------|------------------|-----------------------------|-------------|-------------------------------------------------------------------|---------------------------------------------------------------------------------------|----------------------|----------------------------------------------------------------------------------------------------------------------------|
| USA [90]<br>(March/deVeciana) | 2013             | 2009/2011                   | 113         | Singletons, 24-28 <sup>6</sup> weeks' GA                          | UCM: 10cm, immediately after delivery, ~20cm actively milked x 3                      | ICC                  | RBC transfusion within 28 days of life                                                                                     |
| USA [91]<br>(Driggers)        | n/a              | 2011/2013                   | 2           | Infants delivered at 24 <sup>0</sup> to 28 <sup>6</sup> weeks' GA | Arm 1: DCC at 30 sec<br>Arm 2: UCM x4 in 10 sec                                       | Arm 3: ICC           | Adverse neonatal event: composite of BPD, NEC, grade 3 or 4 IVH or PVL, or death prior to discharge                        |
| USA [92]<br>(Elimian)         | 2014             | 2008/2011                   | 200         | Singletons, 24-34 weeks' GA                                       | DCC: at 30-35 sec (3-4 passes of milking toward the neonate was allowed)              | ICC: <5 sec          | Need for blood transfusion                                                                                                 |
| USA [93]<br>(Ibrahim)         | 2000             | n/a                         | 32          | Birthweight 501g-1250g, 24 to <29 weeks' GA                       | DCC: 20 sec                                                                           | ICC                  | Number of blood transfusions                                                                                               |
| USA [94]<br>(Josephsen)       | n/a              | 2012/2016                   | 80          | 24-27 <sup>6</sup> weeks' GA                                      | UCM: below level of placenta and ~20 cm cord milked x3 over 10-20 sec before clamping | ICC                  | Haemoglobin and haematocrit concentrations (within 4 hrs birth)<br>Incidence and number blood transfusions until discharge |
| USA [95]<br>(Katheria 2011)   | 2014 & 2017      | 2011/2013                   | 60          | <32 weeks' GA                                                     | UCM: x3, below placenta, about 20cm of cord over 2 sec                                | ICC                  | Superior vena cava flow at 6 hours                                                                                         |
| USA [96]<br>(Katheria 2013)   | 2015 & 2017      | 2013/2018                   | 197         | 23-31 <sup>6</sup> weeks' GA                                      | UCM: x4 at 20 cm/2 sec                                                                | DCC: at 45-60 sec    | Superior vena cava flow at <12 hrs                                                                                         |
| USA [97]<br>(Katheria 2016)   | 2016             | 2014/2015                   | 150         | <32 weeks' GA                                                     | CPAP + DCC at 60s                                                                     | DCC: 60s             | Peak haematocrit in first 24 hours of life                                                                                 |
| USA [98]<br>(Katheria 2017)   | n/a              | 2017/2022                   | 1200        | 23-32 <sup>6</sup> weeks' GA                                      | UCM: x4 at 20cm/2 sec                                                                 | DCC: at least 60 sec | Incidence of IVH or death at discharge, up to 6 months corrected gestational age                                           |

| Trial Country (PI)       | Publication year   | Start year/ completion year | Sample size            | Participants                                   | Intervention                                                                                          | Comparator                                                    | Primary outcome/s                                             |
|--------------------------|--------------------|-----------------------------|------------------------|------------------------------------------------|-------------------------------------------------------------------------------------------------------|---------------------------------------------------------------|---------------------------------------------------------------|
| USA [99] (Katheria 2019) | n/a                | 2019/2020                   | 1000 (not all preterm) | Non-vigorous newborns born at 35-42 weeks' GA* | UCM: x4, entire umbilical length over 2 sec.                                                          | ICC: within 30 sec                                            | Admission to NICU in the first 48 hrs of life                 |
| USA [100] (Kattwinkel)   | n/a                | 2016/2021                   | 940                    | 23 <sup>0</sup> -28 <sup>6</sup> weeks' GA     | DCC: Assisted ventilation (face mask, CPAP or PPV) prior to DCC at 120 sec                            | DCC: 30-60 sec, assisted ventilation only after cord clamping | IVH (7-10 days)                                               |
| USA [101] (Krueger)      | 2015               | 2012/2013                   | 67                     | Singletons, 22-31 <sup>6</sup> weeks' GA       | DCC & UCM: cord milking x4 with 4-5 sec between each, then DCC at 30 sec                              | DCC: 30 sec, without cord milking                             | Initial fetal haematocrit                                     |
| USA [102] (Martin)       | n/a                | 2012/2014                   | 72                     | Singletons, 23-37 weeks' GA                    | Arm 1: DCC at 60 sec<br>Arm 2: DCC at 40 sec                                                          | DCC: 20 sec                                                   | IVH number and severity (15 months)                           |
| USA [103] (Mercer 2003)  | 2003               | 1998/2001                   | 32                     | Singletons, 24-31 <sup>6</sup> weeks' GA       | DCC: 30-45 sec                                                                                        | ICC: 5-10 sec                                                 | Initial mean blood pressure on arrival in NICU                |
| USA [104] (Mercer 2006)  | 2006               | 2003/2004                   | 72                     | Singletons, <32 weeks' GA                      | DCC: 30-45 sec                                                                                        | ICC: 5-10 sec                                                 | BPD, suspected NEC                                            |
| USA [105] (Mercer 2008)  | 2011 & 2016 & 2018 | 2008/2014                   | 211                    | Singletons, 24-31 <sup>6</sup> weeks' GA       | DCC & UCM: milking x1 then DCC at 30-45 sec. If clamping cannot be deferred, cord milked x2-3 quickly | ICC: <10 sec                                                  | IVH, late onset sepsis                                        |
| USA [106] (Oh)           | 2011               | 2000/2001                   | 33                     | Singletons, 24-27 <sup>6</sup> weeks' GA       | DCC: at 30-45 sec                                                                                     | ICC: <10 sec                                                  | venous haematocrit at 4 hours of age                          |
| USA [107] (Perlman)      | n/a                | 2015/2019                   | 150                    | 28-34 <sup>6</sup> weeks' GA                   | DCC: at 60 sec                                                                                        | DCC: at 30 sec                                                | Haematocrit 1 hour after birth                                |
| USA [108] (Smith)        | n/a                | 2014/2018                   | 282                    | 23 <sup>0</sup> -34 <sup>6</sup> weeks' GA     | UCM: x4, before clamping                                                                              | DCC: at 30 sec                                                | Haemoglobin & haematocrit in NICU from admission to discharge |
| USA [109] (Strauss)      | 2008               | n/a                         | 158[97]                | ≤36 weeks' GA                                  | DCC: 60 sec                                                                                           | ICC                                                           | RBC volume/mass, per biotin labelling                         |

| Trial Country (PI)          | Publication year   | Start year/ completion year | Sample size | Participants                                  | Intervention                         | Comparator     | Primary outcome/s                                  |
|-----------------------------|--------------------|-----------------------------|-------------|-----------------------------------------------|--------------------------------------|----------------|----------------------------------------------------|
| USA [110]<br>(Yared/Young)  | n/a                | 2015/2016                   | 39          | Very low birth weight<br>(500 to 1500 grams)* | DCC: at 60 sec                       | DCC: at 30 sec | IVH (during NICU admission<br>up to 6 months)      |
| Thailand [111]<br>(Pongmee) | 2010<br>(abstract) |                             | 43          | <35 weeks' GA                                 | UCM: x2 along 30 cm after<br>cutting | ICC            | Initial haematocrit, need for<br>blood transfusion |

\* only those born <37 weeks gestation eligible

\*\* PI advised individual participant data not available due to time elapsed since trial

PI = Principal Investigator

cm = centimetres

sec = seconds

min = minutes

NICU = neonatal intensive care unit

GA = gestational age

PMA = postmenstrual age

ICC = immediate cord clamping

DCC = deferred cord clamping

UCM = umbilical cord milking

PBCC = physiological based cord clamping

RBC = red blood cell

CPAP = continuous positive airway pressure

PO2 = partial pressure of oxygen

PPV = positive pressure ventilation

NIRS = near-infrared spectroscopy

PVL = periventricular leukomalacia

ROP = retinopathy of prematurity

BPD = bronchopulmonary dysplasia

EEG = electroencephalogram

IVH = intraventricular haemorrhage

PVH = periventricular haemorrhage

HIE = hypoxic ischemic encephalopathy

NEC = necrotising enterocolitis

IUGR = intrauterine growth retardation

PCV = polycythaemia

## References

1. ISRCTN registry website: **Early compared to delayed umbilical cord clamping in very small prematurely born babies: A study to know which one is better for infant health.** <http://www.isrctn.com/ISRCTN12219110>. Accessed August 27, 2018.
2. ANZCTR registry website: **Resuscitating newborn infants with the umbilical cord intact- The Baby-Directed Umbilical Cord Cutting (Baby-DUCC) Trial.** <http://www.anzctr.org.au/ACTRN12618000621213.aspx>. Accessed 20th February, 2019.
3. McDonnell M, Henderson-Smart D: **Delayed umbilical cord clamping in preterm infants: a feasibility study.** *Journal of paediatrics and child health* 1997, **33**(4):308-310.
4. ANZCTR website: **CORD CLAMPING STUDY: Early versus delayed cord clamping and its effects on infant heart rate and oxygen saturation in the first minutes after birth.** <https://www.anzctr.org.au/Trial/Registration/TrialReview.aspx?id=365659>. Access 20th February, 2019.
5. Australian New Zealand Clinical Trials Registry: **Australian Placental Transfusion Pilot Study: investigating standard cord clamping procedures versus three methods of autologous placental blood transfusion in pre term infants.** <https://www.anzctr.org.au/Trial/Registration/TrialReview.aspx?ACTRN=12609000248268>. Accessed February 20, 2019.
6. Tarnow-Mordi W, Morris J, Kirby A, Robledo K, Askie L, Brown R, Evans N, Finlayson S, Fogarty M, Gebiski V *et al*: **Delayed versus Immediate Cord Clamping in Preterm Infants.** *New England Journal of Medicine* 2017, **377**(25):2445-2455.

7. ClinicalTrials.gov registry: **C-UCM and Cerebral Oxygenation and Perfusion**. Available at <https://clinicaltrials.gov/ct2/show/NCT03748914>. Accessed February 20, 2019.
8. Yasmeen S, Shahidullah M, Mannan M, Dey A, Chowdhury R, Haque A, Hassan MZ: **Iron Status in Early versus Delayed Cord Clamping Groups of Preterm Neonates Delivered in a Tertiary Level Hospital**. *Journal of Armed Forces Medical College, Bangladesh* 2015, **10**(2):62-65.
9. Chu K, Whittle W, Windrim R, Shah P, Murphy K: **The DUC trial: A pilot randomized controlled trial of immediate vs. delayed umbilical cord clamping in preterm infants born between 24 and 32 weeks gestation**. *American Journal of Obstetrics and Gynecology* 2011, **204**(1 Suppl):S201.
10. El-Naggar W, Simpson D, Hussain A, Armson A, Dodds L, Warren A, Whyte R, McMillan D: **Cord milking versus immediate clamping in preterm infants: a randomised controlled trial**. *Archives of Disease in Childhood - Fetal and Neonatal Edition* 2019, **104**(2):F145-F150.
11. Saigal S, O'Neill A, Surainder Y, Chua LB, Usher R: **Placental transfusion and hyperbilirubinemia in the premature**. *Pediatrics* 1972, **49**(3):406-419.
12. Dai S, Jin X, Qi HJ: **Effect of different cord clamping times on the prognosis of newborns (不同断脐时间对新生儿预后的影响)**. *Modern Pract Med* 2014, **26**:69-71.
13. Dong XY, Sun XF, Li MM, Yu ZB, Han SP: **Influence of delayed cord clamping on preterm infants with a gestational age of <32 weeks [in Chinese]**. *Zhongguo Dang Dai Er Ke Za Zhi* 2016, **18**:635-638.
14. Chinese Clinical Trial Registry website: **Effect of delayed cord clamping versus umbilical cord milking on cerebral blood flow in preterm infant: a randomized, double-blind controlled trial**. <http://www.chictr.org.cn/showprojen.aspx?proj=30981>. Accessed February 20, 2019.
15. Hu X, Xu X: **The Effects of Different Cord Clamping Time in Preterm Infants by Vaginal Delivery [Master's Degree Thesis]** Zhejiang University; 2015.
16. Clinical Trials website: **Immediate VS Delayed Cord Clamping on Newborns**. <https://clinicaltrials.gov/ct2/show/NCT01029496> last accessed August 30, 2018.
17. Li J, Yu B, Wang W, Luo D, Dai Q-l, Gan X-q: **Does intact umbilical cord milking increase infection rates in preterm infants with premature prolonged rupture of membranes?** *The Journal of Maternal-Fetal & Neonatal Medicine* 2018:1-7.
18. Chinese Clinical Trial Registry website: **Delayed cord clamping prevents respiratory distress of infants delivered by selective cesarean section, a randomized controlled trial**. <http://www.chictr.org.cn/showprojen.aspx?proj=30199>. Accessed February 20, 2019.
19. Shi W, Peng J, Chen N: **Effect of delayed cord clamping on outcome of delivery**. *Henan Journal of Preventive Medicine* 2017, **28**:85-87.
20. Clinical Trials website: **The Study on Umbilical Cord Milking to Prevent and Decrease the Severity of Anemia in Preterms**. <https://clinicaltrials.gov/ct2/show/NCT03023917> last accessed August 31, 2018.
21. Australian New Zealand Clinical Trials Registry: **Delayed fetal cord clamping in preterm labour, Risk and benefits**. <https://www.anzctr.org.au/Trial/Registration/TrialReview.aspx?id=374731>. Accessed February 21, 2019.
22. ClinicalTrials.gov registry: **Impact of Umbilical Cord Milking in Preterm Neonates With Placental Insufficiency**. <https://clinicaltrials.gov/ct2/show/NCT03731611> Accessed February 21, 2019.
23. ClinicalTrials.gov registry: **Effect of Delayed Cord Clamping in Preterm Neonates With Placental Insufficiency**, available at <https://clinicaltrials.gov/ct2/show/NCT03731546>. Last accessed Feb 21, 2019.
24. Nelle M, Fisher S, Conze S, Beedgen B, Linderkamp O: **Effects of late cord clamping on circulation in prematures (VLBWI)**. *Pediatric Research* 1998, **44**(3):454.

- 1  
2  
3  
4  
5  
6  
7  
8  
9  
10  
11  
12  
13  
14  
15  
16  
17  
18  
19  
20  
21  
22  
23  
24  
25  
26  
27  
28  
29  
30  
31  
32  
33  
34  
35  
36  
37  
38  
39  
40  
41  
42  
43  
44  
45  
46
25. Rabe H, Wacker A, Hülskamp G, Hörnig-Franz I, Schulze-Everding A, Harms E, Cirkel U, Louwen F, Witteler R, Schneider HP: **A randomised controlled trial of delayed cord clamping in very low birth weight preterm infants.** *Eur J Pediatr* 2000, **159**(10):775-777.
  26. ClinicalTrials.gov registry: **Umbilical Cord Milking in Neonates Who Are Depressed at Birth (MIDAB).** Available at <https://clinicaltrials.gov/ct2/show/NCT03657394>. Last accessed February 21, 2019.
  27. Clinical Trials Registry India website: **Comparison of advantages and disadvantages of early and delayed umbilical cord clamping in low birth weight newborns.** [http://ctri.nic.in/Clinicaltrials/pdf\\_generate.php?trialid=16653&EncHid=&modid=&compid=%27,%2716653det%27](http://ctri.nic.in/Clinicaltrials/pdf_generate.php?trialid=16653&EncHid=&modid=&compid=%27,%2716653det%27) last accessed February 21, 2019.
  28. Clinical Trials Registry India website: **The effects of umbilical cord squeezing in newborn babies requiring some form of intervention to help and support breathing at birth.** [http://www.ctri.nic.in/Clinicaltrials/pdf\\_generate.php?trialid=18641&EncHid=&modid=&compid=%27,%2718641det%27](http://www.ctri.nic.in/Clinicaltrials/pdf_generate.php?trialid=18641&EncHid=&modid=&compid=%27,%2718641det%27), last accessed February 21, 2019.
  29. Chopra A, Thakur A, Garg P, Kler N, Gujral K: **Early versus delayed cord clamping in small for gestational age infants and iron stores at 3 months of age-a randomized controlled trial.** *BMC pediatrics* 2018, **18**(1):234.
  30. Das B, Sundaram V, Tarnow-Mordi W, Ghadge A, Dhaliwal LK, Kumar P: **Placental transfusion in preterm neonates of 30–33 weeks' gestation: a randomized controlled trial.** *Journal of Perinatology* 2018, **38**:496–504.
  31. Datta V, Kumar A, Yadav R: **A randomized controlled trial to evaluate the role of brief delay in cord clamping in preterm neonates (34-36 weeks) on short-term neurobehavioural outcome.** *Journal of Tropical Pediatrics* 2017, **63**(6):418–424.
  32. Dhaliwal LK, Anjumunnisa S, Kumar P, Saha PK, Venkataseshan S: **Effects of placental transfusion in preterm birth.** *J Matern Fetal Neonatal Med* 2014, **27**(S1):369-370.
  33. Dipak NK, Nanavat RN, Kabra NK, Srinivasan A, Ananthan A: **Effect of Delayed Cord Clamping on Hematocrit, and Thermal and Hemodynamic Stability in Preterm Neonates: A Randomized Controlled Trial.** *Indian Pediatr* 2017, **54**(2):112-115.
  34. Clinical Trials Registry India website: **Effect of umbilical cord milking of late preterm and term infants on maternal and neonatal outcomes in a tertiary care hospital in South India: A randomized control trial.** <http://www.ctri.nic.in/Clinicaltrials/pmaindet2.php?trialid=19631> last accessed February 21, 2019.
  35. Clinical Trials Registry India website: **Early versus Delayed Cord clamping in IUGR Preterms a Randomised controlled study.** <http://ctri.nic.in/Clinicaltrials/showallp.php?mid1=25064&EncHid=&userName=015204> last accessed February 21, 2019.
  36. Kumar B, Upadhyay A, Gothwal S, Jaiswal V, Joshi P, Dubey K: **Umbilical Cord Milking and Hematological Parameters in Moderate to Late Preterm Neonates: A Randomized Controlled Trial.** *Indian Pediatr* 2015, **52**(9):753-757.
  37. Clinical Trials Registry India website: **Umbilical cord milking in preterm neonates requiring resuscitation: A randomized controlled trial** <http://www.ctri.nic.in/Clinicaltrials/pmaindet2.php?trialid=10609> last accessed August 31, 2018.
  38. Rana A, Agarwal K, Ramji S, Gandhi G, Sahu L: **Safety of delayed umbilical cord clamping in preterm neonates of less than 34 weeks of gestation: a randomized controlled trial.** *Obstetrics & Gynecology Science* 2018, **61**(6):655-661.
  39. Ranjit T, Nesargi S, Rao PNS, Sahoo JP, Ashok C, Chandrakala BS, Bhat S: **Effect of Early versus Delayed Cord Clamping on Hematological Status of Preterm Infants at 6 wk of Age.** *The Indian Journal of Pediatrics* 2015, **82**(1):29-34.

- 1
  - 2
  - 3
  - 4
  - 5
  - 6
  - 7
  - 8
  - 9
  - 10
  - 11
  - 12
  - 13
  - 14
  - 15
  - 16
  - 17
  - 18
  - 19
  - 20
  - 21
  - 22
  - 23
  - 24
  - 25
  - 26
  - 27
  - 28
  - 29
  - 30
  - 31
  - 32
  - 33
  - 34
  - 35
  - 36
  - 37
  - 38
  - 39
  - 40
  - 41
  - 42
  - 43
  - 44
  - 45
  - 46
40. Clinical Trials Registry India website: **Comparison of Umbilical cord milking with Delayed cord clamping in late preterm and term neonates: Randomized control trial.** [www.ctri.nic.in/Clinicaltrials/pmaindet2.php?trialid=14204](http://www.ctri.nic.in/Clinicaltrials/pmaindet2.php?trialid=14204). Accessed August 31, 2018.
41. CLinical Trials Registry India website: **Effect of cord milking on hemodynamic status and morbidities in neonates more than 35 weeks of gestation.** <http://www.wctricin/Clinicaltrials/pmaindet2.php?trialid=3182> last accessed August 31, 2018.
42. ClinicalTrials.gov registry: **Effect of Intact Umbilical Cord Milking on Neonatal and First Year Neurodevelopmental Outcomes in Very Preterm Infants. (Cord Milking).** <https://clinicaltrials.gov/ct2/show/NCT03200301> last accessed February 22, 2019.
43. Armanian AM, Ghasemi Tehrani H, Ansari M, Ghaemi S: **Is "Delayed Umbilical Cord Clamping" Beneficial for Premature Newborns?** *Int J Pediatr* 2017, **5**(5):4909-4918.
44. Kazemi MV, Akbarianrad Z, Zahedpasha Y, Mehraein R, Mojaveri MH: **Effects of Delayed Cord Clamping on Intraventricular Hemorrhage in Preterm Infants.** *Iran J Pediatr* 2017 **27**(5):e6570.
45. Iranian Registry of Clinical Trials website: **Investigation and comparison of neonatal complications of two methods of umbilical cord milking and early cord clamping in neonates.** <http://enirctir/trial/29424> last accessed February 22, 2019.
46. Sekhavat L, Tabatabaai A: **Immediate and delayed cord clamping in infants born between 26 and 34 weeks.** *Journal of Maternal-Fetal and Neonatal Medicine* 2008, **21**((Suppl 1)):181–182.
47. Iranian Registry of Clinical Trials website: **The delayed umbilical cord clamping effects on early outcome in Preterm neonates.** <http://enirctir/trial/17924> last accessed February 22, 2019.
48. ISRCTN registry website: **Clamping the umbilical cord in premature deliveries (CUPID).** <http://www.isrctn.com/ISRCTN92719670> last accessed August 27, 2018.
49. Kugelman A, Borenstein-Levin L, Riskin A, Chistyakov I, Ohel G, Gonen R, Bader D: **Immediate versus delayed umbilical cord clamping in premature neonates born < 35 weeks: a prospective, randomized, controlled study.** *Am J Perinatol* 2007, **24**(5):307-315.
50. Hosono S, Mugishima H, Fujita H, Hosono A, Minato M, Okada T, Takahashi S, Harada K: **Umbilical cord milking reduces the need for red cell transfusions and improves neonatal adaptation in infants born at less than 29 weeks' gestation: a randomised controlled trial.** *Arch Dis Child Fetal Neonatal Ed* 2008, **93**(1):F14-19.
51. UMIN clinical trials registry: **A multicenter randomized control study of the effect of umbilical cord milking.** [https://upload.umin.ac.jp/cgi-open-bin/ctr\\_e/ctr\\_view.cgi?recptno=R000001193](https://upload.umin.ac.jp/cgi-open-bin/ctr_e/ctr_view.cgi?recptno=R000001193) last accessed 31 August, 2018.
52. Song SY, Kim Y, Kang BH, Yoo HJ, Lee M: **Safety of umbilical cord milking in very preterm neonates: a randomized controlled study.** *Obstet Gynecol Sci* 2017, **60**(6):527-534.
53. Zisovska E, Lazarevska L, Spasova L, Zivkovic J: **The effect of delayed cord clamping on the need for blood transfusion: P17.** *Transfusion Alternatives in Transfusion Medicine* 2008, **10**.
54. Clinical Trials website: **Effect of Timing of Umbilical Cord Clamping on Anaemia at 8 and 12 Months and Later Neurodevelopment.** <https://clinicaltrials.gov/ct2/show/NCT02222805> last accessed August 27, 2018.
55. ISRCTN registry website: **Effect of timing of cord clamping in newborns during first 10 minutes of birth.** <http://www.isrctn.com/ISRCTN10944304> last accessed August 27, 2018.

- 1  
2  
3  
4  
5  
6  
7  
8  
9  
10  
11  
12  
13  
14  
15  
16  
17  
18  
19  
20  
21  
22  
23  
24  
25  
26  
27  
28  
29  
30  
31  
32  
33  
34  
35  
36  
37  
38  
39  
40  
41  
42  
43  
44  
45  
46
56. ClinicalTrials.gov registry: **Aeration, Breathing, Clamping Study 3 (ABC3)**. <https://clinicaltrials.gov/ct2/show/NCT03808051> last accessed February 22, 2019.
  57. Ultee CA, van der Deure J, Swart J, Lasham C, van Baar AL: **Delayed cord clamping in preterm infants delivered at 34 36 weeks' gestation: a randomised controlled trial**. *Arch Dis Child Fetal Neonatal Ed* 2008, **93**(1):F20-23.
  58. Malik AU, Shah Nawaz K, Riaz A: **Comparison between the Efficacy of Early and Delayed Umbilical Cord Clamping in Preterm Infants**. *Pak J Med Health Sci* 2013, **7**(4):992-995.
  59. ClinicalTrials.gov registry: **Deferred Cord Clamping Compared to Umbilical Cord Milking in Preterm Infants**. <https://clinicaltrials.gov/ct2/show/NCT02996799> last accessed February 22, 2019.
  60. ClinicalTrials.gov registry: **The Hematologic Impact of Umbilical Cord Milking Versus Deferred Cord Clamping in Premature Neonates**. <https://clinicaltrials.gov/ct2/show/NCT03147846> last accessed February 22, 2019.
  61. Hofmeyr GJ, Bolton KD, Bowen DC, Govan JJ: **Periventricular/intraventricular haemorrhage and umbilical cord clamping. Findings and hypothesis**. *S Afr Med J* 1988, **73**(2):104-106.
  62. Hofmeyr GJ, Gobetz L, Bex PJM, Van Der Griendt M, Nikodem C, Skapinker R, Delahunt T: **Periventricular/intraventricular hemorrhage following early and delayed umbilical cord clamping. A randomized controlled trial**. *Online J Curr Clin Trials* 1993(110).
  63. Tiemersma S, Heistein J, Ruijne R, Lopez G, van Lobenstein J, van Rheenen P: **Delayed cord clamping in South African neonates with expected low birthweight: a randomised controlled trial**. *Tropical Medicine & International Health* 2015, **20**(2):177-183.
  64. ISRCTN registry website: **DElayed Cord CLamping versus early cord clamping in preterm infants born between 24 and 34 weeks**. <http://www.isrctn.com/ISRCTN66018314> last accessed August 27, 2018.
  65. Clinical Trials website: **Umbilical Cord Milking vs Delayed Cord Clamping in Preterm Infants Born by Cesarean Section**. <https://clinicaltrials.gov/ct2/show/NCT02187510> last accessed August 30, 2018.
  66. Lago Leal V, Pamplona Bueno L, Cabanillas Vilaplana L, Nicolas Montero E, Martin Blanco M, Fernandez Romero C, El Bakkali S, Pradillo Aramendi T, Sobrino Lorenzano L, Castellano Esparza P *et al*: **Effect of Milking Maneuver in Preterm Infants: A Randomized Controlled Trial**. *Fetal diagnosis and therapy* 2019, **45**(1):57-61.
  67. Clinical Trials website: **Timing of Umbilical Cord Occlusion in Premature Babies( <33 w). Delayed vs Early. (CODE-P)**. <https://clinicaltrials.gov/ct2/show/NCT02187874> last accessed August 27, 2018.
  68. Baenziger O, Stolkin F, Keel M, von Siebenthal K, Fauchere JC, Das Kundu S, Dietz V, Bucher HU, Wolf M: **The influence of the timing of cord clamping on postnatal cerebral oxygenation in preterm neonates: a randomized, controlled trial**. *Pediatrics* 2007, **119**(3):455-459.
  69. ISRCTN registry website: **Can squeezing blood from the umbilical cord into the baby reduce death and illness in premature babies?** <http://www.isrctn.com/ISRCTN17228884> last accessed February 26, 2019.
  70. Thai Clinical Trials Registry website: **Effect of delayed cord clamping versus cord milking in infants born at < 34 weeks gestation: a randomized controlled trial**. <http://www.clinicaltrials.inth/index.php?tp=regtrials&menu=trialssearch&smenu=fulltext&task=search&task2=view1&id=1277> last accessed August 31, 2018.



- 1  
2  
3  
4  
5  
6  
7  
8  
9  
10  
11  
12  
13  
14  
15  
16  
17  
18  
19  
20  
21  
22  
23  
24  
25  
26  
27  
28  
29  
30  
31  
32  
33  
34  
35  
36  
37  
38  
39  
40  
41  
42  
43  
44  
45  
46
71. Thai Clinical Trials Registry website: **Delayed cord clamping reduced anemic outcome in preterm neonate**, <http://www.clinicaltrials.in.th/index.php?tp=regtrials&menu=trialssearch&smenu=fulltext&task=search&task2=view1&id=3833> last accessed **Feb 25, 2019**.
  72. Mungkornkaew S, Siwadune T: **The Difference of Hematocrit in Term and Preterm Vaginal Births in Different Timing of Delayed Cord Clamping**. *Thai Journal of Obstetrics and Gynaecology* 2015;223-230.
  73. Thai Clinical Trials Registry website: **Effects of delayed versus early cord clamping in late preterm infants: a randomized controlled trial**. <http://www.clinicaltrials.in.th/index.php?tp=regtrials&menu=trialssearch&smenu=fulltext&task=search&task2=view1&id=1279> last accessed August 29, 2018.
  74. Thai Clinical Trials Registry website: **A Randomized Controlled Trial of Immediate versus Delayed Umbilical Cord Clamping in Preterm Infants of Multiple Births**. <http://www.clinicaltrials.in.th/index.php?tp=regtrials&menu=trialssearch&smenu=fulltext&task=search&task2=view1&id=2189> last accessed August 29, 2018.
  75. Salae R, Tanprasertkul C, Somprasit C, Bhamarapratana K, Suwannarurk K: **Efficacy of delayed versus immediate cord clamping in late preterm newborns following normal labor: a randomized control trial**. *J Med Assoc Thai* 2016, **99**(4):S159-S165.
  76. Thai Clinical Trials Registry website: **The Effect of One-Time Umbilical Cord Milking and Early Cord Clamping in Preterm Infants: A Randomized Controlled Trial (One-Time Umbilical Cord Milking)**. <http://clinicaltrials.in.th/index.php?tp=regtrials&menu=trialssearch&smenu=fulltext&task=search&task2=view1&id=2347> last accessed August 31, 2018.
  77. Alan S, Arsan S, Okulu E, Akin IM, Kilic A, Taskin S, Cetinkaya E, Erdeve O, Atasay B: **Effects of Umbilical Cord Milking on the Need for Packed Red Blood Cell Transfusions and Early Neonatal Hemodynamic Adaptation in Preterm Infants Born  $\leq$ 1500 g: A Prospective, Randomized, Controlled Trial**. *Journal of Pediatric Hematology/Oncology* 2014, **36**(8):e493-e498.
  78. Gokmen Z, Ozkiraz S, Tarcan A, Kozanoglu I, Ozcimen Emel E, Ozbek N: **Effects of delayed umbilical cord clamping on peripheral blood hematopoietic stem cells in premature neonates**. *Journal of Perinatal Medicine* 2011, **39**:323–329.
  79. Kilicdag H, Gulcan H, Hanta D, Torer B, Gokmen Z, Ozdemir SI, Antmen BA: **Is umbilical cord milking always an advantage?** *The Journal of Maternal Fetal & Neonatal Medicine* 2016, **29**(4):615-618.
  80. Silahli M, Duman E, Gokmen Z, Toprak E, Gokdemir M, Ecevit A: **The relationship between placental transfusion, and thymic size and neonatal morbidities in premature infants - A Randomized Control Trial**. *JPMA The Journal of the Pakistan Medical Association* 2018, **68**(11):1560-1565.
  81. Aladangady N, McHugh S, Aitchison TC, Wardrop CA, Holland BM: **Infants' blood volume in a controlled trial of placental transfusion at preterm delivery**. *Pediatrics* 2006, **117**(1):93-98.
  82. Duley L, Dorling J, Pushpa-Rajah A, Oddie SJ, Yoxall CW, Schoonakker B, Bradshaw L, Mitchell EJ, Fawke JA: **Randomised trial of cord clamping and initial stabilisation at very preterm birth**. *Archives of Disease in Childhood - Fetal and Neonatal Edition* 2018, **103**(1):F6-F14.
  83. Kinmond S, Aitchison TC, Holland BM, Jones JG, Turner TL, Wardrop CA: **Umbilical cord clamping and preterm infants: a randomised trial**. *BMJ (Clinical research ed)* 1993, **306**(6871):172-175.
  84. Medina IMF: **Late clamping of the umbilical cord in premature neonates: The real haemodynamic benefits**. *Enfermeria Clinica* 2014, **24**(5):305-308.

- 1  
2  
3  
4  
5  
6  
7  
8  
9  
10  
11  
12  
13  
14  
15  
16  
17  
18  
19  
20  
21  
22  
23  
24  
25  
26  
27  
28  
29  
30  
31  
32  
33  
34  
35  
36  
37  
38  
39  
40  
41  
42  
43  
44  
45  
46
85. Rabe H, Jewison A, Alvarez RF, Crook D, Stilton D, Bradley R, Holden D: **Milking compared with delayed cord clamping to increase placental transfusion in preterm neonates: a randomized controlled trial.** *Obstetrics & Gynecology* 2011, **117**(2):205-211.
  86. Backes CH, Huang H, Iams JD, Bauer JA, Giannone PJ: **Timing of umbilical cord clamping among infants born at 22 through 27 weeks' gestation.** *J Perinatol* 2016, **36**(1):35-40.
  87. Clinical Trials website: **Effects of Delayed Cord Clamp and/or Indomethacin on Preterm Infant Brain Injury.** <https://clinicaltrials.gov/ct2/show/NCT02221219> last accessed August 27, 2018.
  88. ClinicalTrials.gov registry: **Relationship Between Delayed Cord Clamping at Birth and Neonatal Bilirubin Levels in Parturients With a Prior Child Requiring Therapy for Neonatal Jaundice,** <https://clinicaltrials.gov/ct2/show/NCT03741803> last accessed February 25th, 2019.
  89. Clinical Trials website: **Milking the Umbilical Cord Versus Immediate Clamping in Pre-term Infants < 33 Weeks.** <https://clinicaltrials.gov/ct2/show/NCT01819532> last accessed August 30, 2018.
  90. March MI, Hacker MR, Parson AW, Modest AM, de Veciana M: **The effects of umbilical cord milking in extremely preterm infants: A randomized controlled trial.** *J Perinatol* 2013, **33**(10):763-767.
  91. ClinicalTrials.gov registry: **Delayed Umbilical Cord Clamping Versus Cord Milking in Preterm Neonate,** <https://clinicaltrials.gov/ct2/show/NCT01393834> last accessed 25th February, 2019.
  92. Clinical Trials website: **A Randomized Controlled Trial of Immediate Versus Delayed Cord Clamping in the Preterm Neonate.** <https://clinicaltrials.gov/ct2/show/NCT00579839> last accessed August 27, 2018.
  93. Ibrahim HM, Krouskop RW, Lewis DF, Dhanireddy R: **Placental transfusion: umbilical cord clamping and preterm infants.** *Journal of Perinatology* 2000, **20**(6):351.
  94. Josephsen J, Vlastos E, Potter S, Al-Hosni M: **Milking the umbilical cord in extreme preterm infants.** *Am J Obstet Gynecol* 2014, **10**(1 Suppl):S403-404.
  95. Katheria AC, Leone TA, Woelkers D, Garey DM, Rich W, Finer NN: **The effects of umbilical cord milking on hemodynamics and neonatal outcomes in premature neonates.** *J Pediatrics* 2014, **164**(5):1045-1050.
  96. Katheria AC, Truong G, Cousins L, Oshiro B, Finer NN: **Umbilical cord milking versus delayed cord clamping in preterm infants.** *Pediatrics* 2015, **136**(1):61-69.
  97. Katheria A, Poeltler D, Durham J, Steen J, Rich W, Arnell K, Maldonado M, Cousins L, Finer N: **Neonatal Resuscitation with an Intact Cord: A Randomized Clinical Trial.** *Journal of Pediatrics* 2016, **178**:75-80.e73.
  98. ClinicalTrials.gov registry: **Premature Infants Receiving Milking or Delayed Cord Clamping: PREMOD2.** Available at <https://clinicaltrials.gov/ct2/show/NCT03019367>. Accessed August 23, 2019.
  99. ClinicalTrials.gov registry: **Umbilical Cord Milking in Non-Vigorous Infants (MINVI).** Available at <https://clinicaltrials.gov/ct2/show/NCT03631940>. Accessed August 23, 2019.
  100. Clinical Trials website: **VentFirst: A Multicenter RCT of Assisted Ventilation During Delayed Cord Clamping for Extremely Preterm Infants.** <https://clinicaltrials.gov/ct2/show/NCT02742454> last accessed August 27, 2018.
  101. Krueger MS, Eyal FG, Peevy KJ, Hamm CR, Whitehurst RM, Lewis DF: **Delayed cord clamping with and without cord stripping: A prospective randomized trial of preterm neonates.** *Am J Obstet Gynecol* 2015, **212**(3):394.e391-395.

- 1  
2  
3  
4  
5  
6  
7  
8  
9  
10  
11  
12  
13  
14  
15  
16  
17  
18  
19  
20  
21  
22  
23  
24  
25  
26  
27  
28  
29  
30  
31  
32  
33  
34  
35  
36  
37  
38  
39  
40  
41  
42  
43  
44  
45  
46
102. Clinical Trials website: **Optimal Timing of Cord Clamping in Preterm Pregnancy Following Vaginal or Cesarean Delivery (CordClamp)**. <https://clinicaltrials.gov/ct2/show/NCT01766908> last accessed August 27, 2018.
103. Mercer JS, McGrath MM, Hensman A, Silver H, Oh W: **Immediate and delayed cord clamping in infants born between 24 and 32 weeks: a pilot randomized controlled trial**. *Journal of perinatology* 2003, **23**(6):466.
104. Mercer JS, Vohr BR, McGrath MM, Padbury JF, Wallach M, Oh W: **Delayed cord clamping in very preterm infants reduces the incidence of intraventricular hemorrhage and late-onset sepsis: a randomized, controlled trial**. *Pediatrics* 2006, **117**(4):1235-1242.
105. Mercer JS, Erickson-Owens DA, Vohr BR, Tucker RJ, Parker AB, Oh W, Padbury JF: **Effects of placental transfusion on neonatal and 18 month outcomes in preterm infants: a randomized controlled trial**. *J Pediatrics* 2016, **168**:50-55.
106. Oh W, Fanaroff AA, Carlo WA, Donovan EF, McDonald SA, Poole WK, Eunice Kennedy Shriver National Institute of Child Health and Human Development Neonatal Research Network: **Effects of delayed cord clamping in very-low-birth-weight infants**. *J Perinatol* 2011, **31**:S68-S71.
107. Clinical Trials website: **Delayed Cord Clamping in Preterm Neonates (DCC)**. <https://clinicaltrials.gov/ct2/show/NCT02478684> last accessed August 29, 2018.
108. Clinical Trials website: **Delayed Clamping and Milking the Umbilical Cord in Preterm Infants**. <https://clinicaltrials.gov/ct2/show/NCT02092103> last accessed August 31, 2018.
109. Strauss RG, Mock DM, Johnson KJ, Cress GA, Burmeister LF, Zimmerman MB, Bell EF, Rijhsinghani A: **A randomized clinical trial comparing immediate versus delayed clamping of the umbilical cord in preterm infants: short-term clinical and laboratory endpoints**. *Transfusion* 2008, **48**(4):658-665.
110. ClinicalTrials.gov registry: **Delayed Cord Clamping in Very Low Birth Weight Infants (DCC)**. Available at <https://clinicaltrials.gov/ct2/show/NCT02337088>. Accessed August 23, 2019.
111. Pongmee P, Nuntnarumit P: **Effects of umbilical cord milking on initial hematocrit and the need for blood transfusion in preterm infants**. In: **Pediatric Academic Societies Annual Meeting; 2010 May 1-4; Vancouver, Canada. 2010**.

## Supplementary File 2: PRISMA-P checklist

| Section and topic    | Item no. | Checklist item                                                                                                                                                                                                                | Page number          |
|----------------------|----------|-------------------------------------------------------------------------------------------------------------------------------------------------------------------------------------------------------------------------------|----------------------|
| Title                | 1a       | Identify the report as a protocol of a systematic review                                                                                                                                                                      | p.1                  |
|                      | 1b       | If protocol is for an update of a previous review, identify as such                                                                                                                                                           | Not applicable       |
| Registration         | 2        | If registered, provide the name of the registry and registration number.                                                                                                                                                      | p.2                  |
| Authors              | 3a       | Provide name, institutional affiliation, email address of all protocol authors, provide physical mailing address of corresponding author.                                                                                     | p.1                  |
|                      | 3b       | Describe contributions of protocol authors and identity the guarantor of the review.                                                                                                                                          | p.16                 |
| Amendments           | 4        | If the protocol represents an amendment of a previously completed or published protocol, identify as such and list changes; otherwise, state plan for documenting important protocol amendments.                              | p.11, p.12           |
| Support              | 5a       | Indicate sources of financial or other support for the review.                                                                                                                                                                | p.16                 |
|                      | 5b       | Provide name for review funder and/or sponsor.                                                                                                                                                                                | p.16                 |
|                      | 5c       | Describe roles of funder(s), sponsor(s), and/or institution(s), if any, in developing the protocol.                                                                                                                           | p.16                 |
| Rationale            | 6        | Describe the rationale for the review in the context of what is already known.                                                                                                                                                | p.4-5                |
| Objectives           | 7        | Provide an explicit statement of the question(s) the review will address with reference to participants, interventions, comparators and outcomes (PICO)                                                                       | p.6                  |
| Eligibility criteria | 8        | Specify the study characteristics (such as PICO, study design, setting time frame) and report characteristics (such as years considered, language, publication status) to be used as criteria for eligibility for the review. | p.6-8                |
| Information sources  | 9        | Describe all intended information sources (such as electronic databases, contact with study authors, trial registers or other grey literature sources) with planned dates of coverage.                                        | p.8-9                |
| Search strategy      | 10       | Present draft of search strategy to be used for at least one electronic database, including planned limits, such that it could be repeated.                                                                                   | Supplementary File 3 |

|    |                                    |     |                                                                                                                                                                                                                                                   |            |
|----|------------------------------------|-----|---------------------------------------------------------------------------------------------------------------------------------------------------------------------------------------------------------------------------------------------------|------------|
| 1  | Study records                      | 11a | Describe the mechanism(s) that will be used to manage records and data throughout the review.                                                                                                                                                     | p.8 ff.    |
| 2  |                                    | 11b | State the process that will be used for selecting studies (such as two independent reviewers) through each phase of the review (that is, screening, eligibility and inclusion in meta-analysis).                                                  | p.8        |
| 3  |                                    |     |                                                                                                                                                                                                                                                   |            |
| 4  |                                    |     |                                                                                                                                                                                                                                                   |            |
| 5  |                                    |     |                                                                                                                                                                                                                                                   |            |
| 6  |                                    |     |                                                                                                                                                                                                                                                   |            |
| 7  |                                    |     |                                                                                                                                                                                                                                                   |            |
| 8  |                                    | 11c | Describe planned method of extracting data from reports (such as piloting forms, done independently, in duplicate), any processes for obtaining and confirming data from investigators.                                                           | p.8 ff.    |
| 9  |                                    |     |                                                                                                                                                                                                                                                   |            |
| 10 |                                    |     |                                                                                                                                                                                                                                                   |            |
| 11 |                                    |     |                                                                                                                                                                                                                                                   |            |
| 12 | Data items                         | 12  | List and define all variables for which data will be sought (such as PICO items, funding sources), and pre-planned data assumptions and simplifications.                                                                                          | p.9 ff.    |
| 13 |                                    |     |                                                                                                                                                                                                                                                   |            |
| 14 |                                    |     |                                                                                                                                                                                                                                                   |            |
| 15 | Outcomes and prioritization        | 13  | List and define all outcomes for which data will be sought, including prioritization of main and additional outcomes, with rationale.                                                                                                             | p.9 ff.    |
| 16 |                                    |     |                                                                                                                                                                                                                                                   |            |
| 17 |                                    |     |                                                                                                                                                                                                                                                   |            |
| 18 | Risk of bias in individual studies | 14  | Describe anticipated methods for assessing risk of bias of individual studies, including whether this will be done at the outcome or study level, or both; state how this information will be used in data synthesis.                             | p.9        |
| 19 |                                    |     |                                                                                                                                                                                                                                                   |            |
| 20 |                                    |     |                                                                                                                                                                                                                                                   |            |
| 21 |                                    |     |                                                                                                                                                                                                                                                   |            |
| 22 |                                    |     |                                                                                                                                                                                                                                                   |            |
| 23 | Data synthesis                     | 15a | Describe criteria under which study data will be quantitatively synthesised.                                                                                                                                                                      | p.12, p.13 |
| 24 |                                    |     |                                                                                                                                                                                                                                                   |            |
| 25 |                                    | 15b | If data are appropriate for quantitative synthesis, describe planned summary measures, methods of handling data and methods of combining data from studies, including any planned exploration of consistency (such as $I^2$ , Kendall's $\tau$ ). | p.12, p.13 |
| 26 |                                    |     |                                                                                                                                                                                                                                                   |            |
| 27 |                                    |     |                                                                                                                                                                                                                                                   |            |
| 28 |                                    |     |                                                                                                                                                                                                                                                   |            |
| 29 |                                    |     |                                                                                                                                                                                                                                                   |            |
| 30 |                                    |     |                                                                                                                                                                                                                                                   |            |
| 31 |                                    | 15c | Describe any proposed additional analyses (such as sensitivity or subgroup analyses, meta-regression).                                                                                                                                            | p.14       |
| 32 |                                    |     |                                                                                                                                                                                                                                                   |            |
| 33 |                                    |     |                                                                                                                                                                                                                                                   |            |
| 34 |                                    | 15d | If quantitative synthesis is not appropriate, describe the type of summary planned.                                                                                                                                                               | n.a.       |
| 35 |                                    |     |                                                                                                                                                                                                                                                   |            |
| 36 | Meta-bias(es)                      | 16  | Specify any planned assessment of meta-bias(es) (such as publication bias across studies, selective reporting within studies).                                                                                                                    | p.14       |
| 37 |                                    |     |                                                                                                                                                                                                                                                   |            |
| 38 |                                    |     |                                                                                                                                                                                                                                                   |            |
| 39 | Confidence in cumulative evidence  | 17  | Describe how the strength of the body of evidence will be assessed (such as GRADE).                                                                                                                                                               | p.9        |
| 40 |                                    |     |                                                                                                                                                                                                                                                   |            |
| 41 |                                    |     |                                                                                                                                                                                                                                                   |            |
| 42 |                                    |     |                                                                                                                                                                                                                                                   |            |
| 43 |                                    |     |                                                                                                                                                                                                                                                   |            |
| 44 |                                    |     |                                                                                                                                                                                                                                                   |            |
| 45 |                                    |     |                                                                                                                                                                                                                                                   |            |
| 46 |                                    |     |                                                                                                                                                                                                                                                   |            |

## iCOMP search strategy

1. We used search results from a prospective meta-analysis we had previously planned to conduct on cord clamping in preterm infants. Regular searches were conducted from 2010 to 2017.
2. We used search results up to November 2018 from a recently updated Cochrane review on cord clamping in preterm infants, on which some of us are authors (Rabe H, Gyte GML, Díaz-Rossello JL, Duley L. Effect of timing of umbilical cord clamping and other strategies to influence placental transfusion at preterm birth on maternal and infant outcomes. Cochrane Database of Systematic Reviews 2019, Issue 9. Art. No.: CD003248. DOI: 10.1002/14651858.CD003248.pub4.)
3. We conducted new independent searches for the period from November 2018 onwards.

Details of all searches are elucidated below.

### 1. Search methods – for previously planned PMA (up to September 2017)

We regularly searched the World Health Organisation (WHO) International Clinical Trials Registry Platform (ICTRP) from the period January 2010 to September 2017. In total, fourteen searches were conducted over this period, using a combination of the search terms shown below.

#### 1.1 ICTRP

1. placental transfusion
2. cord clamp\*
3. umbilical cord clamp\*
4. cord milking
5. milking
6. umbilical cord
7. preterm
8. pre-term
9. prematur\*

### 2. Search methods - Cochrane review update (up to November 2018)

The following sources were searched: Cochrane Pregnancy and Childbirth's Trials Register, ClinicalTrials.gov and WHO ICTRP. Further details of each are provided below.

#### 2.1 Pregnancy and Childbirth's Trials Register

- Searched 8 November 2018 by the Cochrane Pregnancy and Childbirth Information Specialist.
- For detailed information about the registry and search strategies, please go to <https://pregnancy.cochrane.org/pregnancy-and-childbirth-groups-trials-register>.

#### 2.2 ICTRP

- Searched 8 November 2018
- cord AND clamp  
 cord and clamping  
 cord AND milking  
 cord AND stripping

#### 2.3 ClinicalTrials.gov

- Searched 8 November 2018

1  
2  
3 Advanced search

4 Interventional studies | cord clamping

5 Interventional studies | cord milking

6 Interventional studies | cord stripping

### 7 8 9 3. Search methods (from November 2018)

10  
11 We searched Ovid MEDLINE, Embase, EBM Reviews - Cochrane Central Register of Controlled Trials,  
12 WHO ICTRP and ClinicalTrials.gov using the search strings below.

#### 13 14 3.1 Ovid MEDLINE(R)

- 15 1. umbilical-cord.mp. or exp umbilical cord/
- 16 2. (Clamp\$ OR Milk\$).af.
- 17 3. (Placenta\$ adj2 transfus\$).af
- 18 4. 2 or 3
- 19 5. exp Infant, Premature/ or preterm\*.mp.
- 20 6. prematur\*.mp.
- 21 7. exp Infant, Low Birth Weight/ or exp Infant, Very Low Birth Weight
- 22 8. exp Infant, Extremely Low Birth Weight
- 23 9. 5 or 6 or 7 or 8
- 24 10. 1 and 4 and 9
- 25 11. limit 10 to (humans and clinical trial, all)
- 26 12. limit 11 to ed=20181001-20190213

#### 27 28 3.2 Embase

- 29 1. umbilical-cord.mp. or exp umbilical cord/
- 30 2. (Clamp\$ OR Milk\$).af.
- 31 3. (Placenta\$ adj2 transfus\$).af
- 32 4. 2 or 3
- 33 5. exp Infant, Premature/ or preterm\*.mp.
- 34 6. prematur\*.mp.
- 35 7. exp Infant, Low Birth Weight/ or exp Infant, Very Low Birth Weight
- 36 8. exp Infant, Extremely Low Birth Weight
- 37 9. 5 or 6 or 7 or 8
- 38 10. 1 and 4 and 9
- 39 11. limit 10 to (human and randomized controlled trial)
- 40 12. limit 11 to yr="2018 -Current"

#### 41 42 3.3 EBM Reviews - Cochrane Central Register of Controlled Trials

- 43 1. umbilical-cord.mp. or exp umbilical cord/
  - 44 2. (Clamp\$ OR Milk\$).af.
  - 45 3. (Placenta\$ adj2 transfus\$).af
  - 46 4. 2 or 3
  - 47 5. exp Infant, Premature/ or preterm\*.mp.
  - 48 6. prematur\*.mp.
  - 49 7. exp Infant, Low Birth Weight/ or exp Infant, Very Low Birth Weight
  - 50 8. exp Infant, Extremely Low Birth Weight
  - 51 9. 5 or 6 or 7 or 8
  - 52 10. 1 and 4 and 9
  - 53 11. limit 10 to yr="2018 -Current"
- 54  
55  
56  
57  
58  
59  
60

## 3.4 WHO ICTRP

| Search string   |                                                                                                                                                                          |
|-----------------|--------------------------------------------------------------------------------------------------------------------------------------------------------------------------|
| Basic search    |                                                                                                                                                                          |
| 1.              | placental transfusion<br>(limit date of registration from 1/11/2018 onwards)                                                                                             |
| 2.              | cord clamp<br>(limit date of registration from 1/11/2018 onwards)                                                                                                        |
| 3.              | cord clamping<br>(limit date of registration from 1/11/2018 onwards)                                                                                                     |
| 4.              | milking<br>(limit date of registration from 1/11/2018 onwards)                                                                                                           |
| Advanced search |                                                                                                                                                                          |
| 5.              | <u>Title:</u> umbilical cord<br><u>Condition:</u> preterm OR premature<br><u>Recruitment Status:</u> All<br>(limit date of registration from 1/11/2018 onwards)          |
| 6.              | <u>Condition:</u> preterm OR premature<br><u>Intervention:</u> "umbilical cord"<br><u>Recruitment Status:</u> All<br>(limit date of registration from 1/11/2018 onwards) |

## 3.5 Clinicaltrials.gov

| Search string |                                                                                                                                                      |
|---------------|------------------------------------------------------------------------------------------------------------------------------------------------------|
| Basic search  |                                                                                                                                                      |
| 1.            | <u>Other terms:</u> "placental transfusion"<br><u>First posted</u> from 11/01/2018 to 02/13/2019 (MM/DD/YYYY)                                        |
| 2.            | <u>Other terms:</u> "cord clamp"<br><u>First posted</u> from 11/01/2018 to 02/13/2019 (MM/DD/YYYY)                                                   |
| 3.            | <u>Other terms:</u> "cord clamping"<br><u>First posted</u> from 11/01/2018 to 02/13/2019 (MM/DD/YYYY)                                                |
| 4.            | <u>Other terms:</u> milking<br><u>First posted</u> from 11/01/2018 to 02/13/2019 (MM/DD/YYYY)                                                        |
| 5.            | <u>Condition or disease:</u> Preterm Birth<br><u>Other terms:</u> "umbilical cord"<br><u>First posted</u> from 11/01/2018 to 02/13/2019 (MM/DD/YYYY) |



# BMJ Open

## Systematic review and network meta-analysis with individual participant data on Cord Management at Preterm Birth (iCOMP): study protocol

|                                 |                                                                                                                                                                                                                                                                                                                                                                                                                                                                                                                                                                                                                                                                                                                                                                                                                                                                                                                                                                                                                                                                                                                                                                                                                                                                                                                                                                                                                                                                                                                                                                                                                                                                                                                                                                                                                                                                                                                    |
|---------------------------------|--------------------------------------------------------------------------------------------------------------------------------------------------------------------------------------------------------------------------------------------------------------------------------------------------------------------------------------------------------------------------------------------------------------------------------------------------------------------------------------------------------------------------------------------------------------------------------------------------------------------------------------------------------------------------------------------------------------------------------------------------------------------------------------------------------------------------------------------------------------------------------------------------------------------------------------------------------------------------------------------------------------------------------------------------------------------------------------------------------------------------------------------------------------------------------------------------------------------------------------------------------------------------------------------------------------------------------------------------------------------------------------------------------------------------------------------------------------------------------------------------------------------------------------------------------------------------------------------------------------------------------------------------------------------------------------------------------------------------------------------------------------------------------------------------------------------------------------------------------------------------------------------------------------------|
| Journal:                        | <i>BMJ Open</i>                                                                                                                                                                                                                                                                                                                                                                                                                                                                                                                                                                                                                                                                                                                                                                                                                                                                                                                                                                                                                                                                                                                                                                                                                                                                                                                                                                                                                                                                                                                                                                                                                                                                                                                                                                                                                                                                                                    |
| Manuscript ID                   | bmjopen-2019-034595.R1                                                                                                                                                                                                                                                                                                                                                                                                                                                                                                                                                                                                                                                                                                                                                                                                                                                                                                                                                                                                                                                                                                                                                                                                                                                                                                                                                                                                                                                                                                                                                                                                                                                                                                                                                                                                                                                                                             |
| Article Type:                   | Protocol                                                                                                                                                                                                                                                                                                                                                                                                                                                                                                                                                                                                                                                                                                                                                                                                                                                                                                                                                                                                                                                                                                                                                                                                                                                                                                                                                                                                                                                                                                                                                                                                                                                                                                                                                                                                                                                                                                           |
| Date Submitted by the Author:   | 22-Jan-2020                                                                                                                                                                                                                                                                                                                                                                                                                                                                                                                                                                                                                                                                                                                                                                                                                                                                                                                                                                                                                                                                                                                                                                                                                                                                                                                                                                                                                                                                                                                                                                                                                                                                                                                                                                                                                                                                                                        |
| Complete List of Authors:       | <p>Seidler, Anna Lene; The University of Sydney, NHMRC Clinical Trials Centre<br/> Duley, Lelia; University of Nottingham, Nottingham Clinical Trials Unit<br/> Katheria, Anup; Sharp Healthcare<br/> De Paco Matallana, Catalina; Clinic University Hospital Virgen de la Arrixaca<br/> Dempsey, E; Cork University Maternity Hospital<br/> Rabe, Heike; Brighton and Sussex University Hospitals, Academic Department of Paediatrics<br/> Kattwinkel, John; University of Virginia<br/> Mercer, Judith; University of Rhode Island, College of Nursing<br/> Josephsen, Justin; St Louis University School of Medicine<br/> Fairchild, Karen; University of Virginia<br/> Andersson, Ola; Uppsala Universitet<br/> Hosono, Shigeharu; Jichi Ika University Saitama Medical Center<br/> Sundaram, Venkateshan; Postgraduate Institute of Medical Education and Research, Newborn unit, Dept of Pediatrics<br/> Datta, Vikram; Lady Hardinge Medical College<br/> El-Naggar, Walid; Dalhousie University, Department of Pediatrics<br/> Tarnow-Mordi, William; The University of Sydney, NHMRC Clinical Trials Centre<br/> Debray, Thomas; University Medical Center Utrecht, Julius Center for Health Sciences and Primary Care<br/> Hooper, Stuart B.; Monash University, The Ritchie Centre, Obstetrics &amp; Gynaecology<br/> Kluckow, Martin; University of Sydney,<br/> Polglase, Graeme; Monash University, The Ritchie Centre, Obstetrics &amp; Gynaecology<br/> Davis, Peter; The Royal Women's Hospital, Newborn Research<br/> Montgomery, Alan; University of Nottingham, Nottingham Clinical Trials Unit<br/> Hunter, Kylie; NHMRC Clinical Trials Centre, University of Sydney<br/> Barba, Angie; The University of Sydney, NHMRC Clinical Trials Centre<br/> Simes, John; University of Sydney, NHMRC Clinical Trials Centre<br/> Askie, Lisa; University of Sydney, NHRMC Clinical Trials Centre</p> |
| <b>Primary Subject Heading</b>: | Paediatrics                                                                                                                                                                                                                                                                                                                                                                                                                                                                                                                                                                                                                                                                                                                                                                                                                                                                                                                                                                                                                                                                                                                                                                                                                                                                                                                                                                                                                                                                                                                                                                                                                                                                                                                                                                                                                                                                                                        |

1  
2  
3  
4  
5  
6  
7  
8  
9  
10  
11  
12  
13  
14  
15  
16  
17  
18  
19  
20  
21  
22  
23  
24  
25  
26  
27  
28  
29  
30  
31  
32  
33  
34  
35  
36  
37  
38  
39  
40  
41  
42  
43  
44  
45  
46  
47  
48  
49  
50  
51  
52  
53  
54  
55  
56  
57  
58  
59  
60

|                            |                                                                                                                                                         |
|----------------------------|---------------------------------------------------------------------------------------------------------------------------------------------------------|
| Secondary Subject Heading: | Obstetrics and gynaecology, Evidence based practice, Research methods                                                                                   |
| Keywords:                  | preterm birth, umbilical cord clamping, placental transfusion, umbilical cord milking, individual participant data meta-analysis, network meta-analysis |
|                            |                                                                                                                                                         |

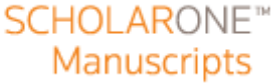



I, the Submitting Author has the right to grant and does grant on behalf of all authors of the Work (as defined in the below author licence), an exclusive licence and/or a non-exclusive licence for contributions from authors who are: i) UK Crown employees; ii) where BMJ has agreed a CC-BY licence shall apply, and/or iii) in accordance with the terms applicable for US Federal Government officers or employees acting as part of their official duties; on a worldwide, perpetual, irrevocable, royalty-free basis to BMJ Publishing Group Ltd ("BMJ") its licensees and where the relevant Journal is co-owned by BMJ to the co-owners of the Journal, to publish the Work in this journal and any other BMJ products and to exploit all rights, as set out in our [licence](#).

The Submitting Author accepts and understands that any supply made under these terms is made by BMJ to the Submitting Author unless you are acting as an employee on behalf of your employer or a postgraduate student of an affiliated institution which is paying any applicable article publishing charge ("APC") for Open Access articles. Where the Submitting Author wishes to make the Work available on an Open Access basis (and intends to pay the relevant APC), the terms of reuse of such Open Access shall be governed by a Creative Commons licence – details of these licences and which [Creative Commons](#) licence will apply to this Work are set out in our licence referred to above.

Other than as permitted in any relevant BMJ Author's Self Archiving Policies, I confirm this Work has not been accepted for publication elsewhere, is not being considered for publication elsewhere and does not duplicate material already published. I confirm all authors consent to publication of this Work and authorise the granting of this licence.

|                                         |                                                                                                                                                                                                                                                                                                                                                                                                                                                                                                                                                                                                                                                                                                                                                                                                                                                                                                                                                                                                                                                                                                                                                                                                                                                                                                                                                                                                                                                                                                                                             |
|-----------------------------------------|---------------------------------------------------------------------------------------------------------------------------------------------------------------------------------------------------------------------------------------------------------------------------------------------------------------------------------------------------------------------------------------------------------------------------------------------------------------------------------------------------------------------------------------------------------------------------------------------------------------------------------------------------------------------------------------------------------------------------------------------------------------------------------------------------------------------------------------------------------------------------------------------------------------------------------------------------------------------------------------------------------------------------------------------------------------------------------------------------------------------------------------------------------------------------------------------------------------------------------------------------------------------------------------------------------------------------------------------------------------------------------------------------------------------------------------------------------------------------------------------------------------------------------------------|
| <b>Title</b>                            | <b>Systematic review and network meta-analysis with individual participant data on Cord Management at Preterm Birth (iCOMP): study protocol</b>                                                                                                                                                                                                                                                                                                                                                                                                                                                                                                                                                                                                                                                                                                                                                                                                                                                                                                                                                                                                                                                                                                                                                                                                                                                                                                                                                                                             |
| <b>Author names</b>                     | Anna Lene Seidler <sup>1</sup> , Lelia Duley <sup>2</sup> , Anup Katheria <sup>3</sup> , Catalina De Paco Matallana <sup>4</sup> , Eugene Dempsey <sup>5</sup> , Heike Rabe <sup>6</sup> , John Kattwinkel <sup>7</sup> , Judith Mercer <sup>8</sup> , Justin Josephsen <sup>9</sup> , Karen Fairchild <sup>7</sup> , Ola Andersson <sup>10</sup> , Shigeharu Hosono <sup>11</sup> , Venkateshan Sundaram <sup>12</sup> , Vikram Datta <sup>13</sup> , Walid El-Naggar <sup>14</sup> , William Tarnow-Mordi <sup>1</sup> , Thomas P.A. Debray <sup>15</sup> , Stuart Hooper <sup>16</sup> , Martin Kluckow <sup>17</sup> , Graeme Polglase <sup>16</sup> , Peter Davis <sup>18</sup> , Alan Montgomery <sup>2</sup> , Kylie E Hunter <sup>1</sup> , Angie Barba <sup>1</sup> , John Simes <sup>1</sup> & Lisa Askie <sup>1</sup> on behalf of the iCOMP collaboration                                                                                                                                                                                                                                                                                                                                                                                                                                                                                                                                                                                                                                                                       |
| <b>Author affiliations</b>              | <sup>1</sup> National Health and Medical Research Council Clinical Trials Centre, University of Sydney, Sydney, Australia<br><sup>2</sup> Nottingham Clinical Trials Unit, University of Nottingham, Nottingham, UK<br><sup>3</sup> Sharp Healthcare, San Diego, California, USA<br><sup>4</sup> Clinic University Hospital Virgen de la Arrixaca, Murcia, Spain<br><sup>5</sup> Cork University Maternity Hospital, Cork, Ireland<br><sup>6</sup> Brighton and Sussex Medical School, University of Sussex, Brighton, UK<br><sup>7</sup> University of Virginia, Charlottesville, Virginia, USA<br><sup>8</sup> The University of Rhode Island, Kingston, Rhode Island, USA<br><sup>9</sup> St Louis University School of Medicine, St. Louis, Missouri, USA<br><sup>10</sup> Uppsala University, Sweden<br><sup>11</sup> Jichi Medical University Saitama Medical Center, Saitama, Japan<br><sup>12</sup> Post Graduate Institute of Medical Education & Research, Chandigarh, India<br><sup>13</sup> Lady Hardinge Medical College, New Delhi, India<br><sup>14</sup> Department of Pediatrics, Dalhousie University, Halifax, Canada<br><sup>15</sup> Julius Center for Health Sciences and Primary Care, University Medical Center Utrecht, Utrecht, the Netherlands<br><sup>16</sup> The Ritchie Centre, Obstetrics & Gynaecology, Monash University, Melbourne, Australia<br><sup>17</sup> Faculty of Medicine and Health, University of Sydney, Sydney, Australia<br><sup>18</sup> The Royal Women's Hospital, Melbourne, Australia |
| <b>Corresponding author</b>             | Correspondence to:<br>Anna Lene Seidler<br>NHMRC Clinical Trials Centre, University of Sydney<br>Locked Bag 77, Camperdown NSW 1450, Australia<br><a href="mailto:lene.seidler@ctc.usyd.edu.au">lene.seidler@ctc.usyd.edu.au</a><br>+61 2 9562 5082                                                                                                                                                                                                                                                                                                                                                                                                                                                                                                                                                                                                                                                                                                                                                                                                                                                                                                                                                                                                                                                                                                                                                                                                                                                                                         |
| <b>Disclaimers</b>                      | None.                                                                                                                                                                                                                                                                                                                                                                                                                                                                                                                                                                                                                                                                                                                                                                                                                                                                                                                                                                                                                                                                                                                                                                                                                                                                                                                                                                                                                                                                                                                                       |
| <b>Source(s) of support</b>             | Developing the protocol and establishing the collaborative group was supported by the UK National Institute of Health Research (grant RPPG060910107). Funding to undertake data collection and data analysis for the iCOMP Collaboration has been provided by the Australian National Health and Medical Research Council (grant APP1163585).                                                                                                                                                                                                                                                                                                                                                                                                                                                                                                                                                                                                                                                                                                                                                                                                                                                                                                                                                                                                                                                                                                                                                                                               |
| <b>Word count</b>                       | 4,995                                                                                                                                                                                                                                                                                                                                                                                                                                                                                                                                                                                                                                                                                                                                                                                                                                                                                                                                                                                                                                                                                                                                                                                                                                                                                                                                                                                                                                                                                                                                       |
| <b>Number of figures and tables</b>     | Number of figures: 2<br>Number to tables: 1                                                                                                                                                                                                                                                                                                                                                                                                                                                                                                                                                                                                                                                                                                                                                                                                                                                                                                                                                                                                                                                                                                                                                                                                                                                                                                                                                                                                                                                                                                 |
| <b>Conflict of interest declaration</b> | Lelia Duley, Anup Katheria, Catalina De Paco Matallana, Eugene Dempsey, Heike Rabe, John Kattwinkel, Judith Mercer, Justin Josephsen, Karen Fairchild, Ola Andersson, Shigeharu Hosono, Venkateshan Sundaram, Vikram Datta, Walid El-Naggar, and William Tarnow-Mordi are Chief Investigators for eligible trials.                                                                                                                                                                                                                                                                                                                                                                                                                                                                                                                                                                                                                                                                                                                                                                                                                                                                                                                                                                                                                                                                                                                                                                                                                          |

## ABSTRACT

**Introduction:** Timing of cord clamping and other cord management strategies may improve outcomes at preterm birth. However, it is unclear whether benefits apply to all preterm subgroups. Previous and current trials compare various policies, including time- or physiology-based deferred cord clamping, and cord milking. Individual participant data (IPD) enables exploration of different strategies within subgroups. Network meta-analysis (NMA) enables comparison and ranking of all available interventions using a combination of direct and indirect comparisons.

**Objectives:** 1) To evaluate the effectiveness of cord management strategies for preterm infants on neonatal mortality and morbidity overall and for different participant characteristics using IPD meta-analysis; and 2) to evaluate and rank the effect of different cord management strategies for preterm births on mortality and other key outcomes using NMA.

**Methods and analysis:** Systematic searches of Medline, Embase, clinical trial registries, and other sources for all ongoing and completed randomised controlled trials comparing cord management strategies at preterm birth (before 37 weeks' gestation) have been completed up to 13 February 2019, but will be updated regularly to include additional trials. IPD will be sought for all trials; aggregate summary data will be included where IPD are unavailable. First, deferred clamping and cord milking will be compared with immediate clamping in pairwise IPD meta-analyses. The primary outcome will be death prior to hospital discharge. Effect differences will be explored for pre-specified participant subgroups. Second, all identified cord management strategies will be compared and ranked in an IPD NMA for the primary outcome and the key secondary outcomes. Treatment effect differences by participant characteristics will be identified. Inconsistency and heterogeneity will be explored.

**Ethics and dissemination:** Approved by University of Sydney Human Research Ethics Committee (2018/886). Results will be relevant to clinicians, guideline-developers and policy-makers, and will be disseminated via publications, presentations, and media releases.

**Registration:** Australian New Zealand Clinical Trials Registry: ACTRN12619001305112; PROSPERO: CRD42019136640

## KEYWORDS

Preterm birth, umbilical cord clamping, umbilical cord milking, placental transfusion, individual participant data meta-analysis, network meta-analysis, prospective meta-analysis

## STRENGTHS AND LIMITATIONS OF THIS STUDY

- This will be the most comprehensive review to date of interventions for umbilical cord management in preterm infants and the findings will be highly relevant to clinicians and guideline developers
- The use of individual participant data will allow assessment of the best treatment option for key subgroups of participants
- Network meta-analysis will enable the comparison and ranking of all available treatment options using direct and indirect evidence
- For some of the trials it will not be possible to obtain individual participant data, so published aggregate results will be used instead
- Risk of bias in the primary trials will be assessed using Cochrane criteria, and certainty of evidence for the meta-analyses will be appraised using the GRADE approach for the pairwise comparisons, and the CINeMA approach for the network meta-analysis

## INTRODUCTION

Currently over 15 million babies are born preterm annually and this number is rising.(1-3) Of these, 1.1 million die, and the morbidity and healthcare costs amongst survivors and their families are high, with preterm survivors having an increased risk of cognitive, developmental and behavioural difficulties, and chronic ill health.(4-9) Hence, even modest improvements in outcomes of preterm birth would substantially benefit the children, their families, and also health services. In uncompromised babies, deferring cord clamping has been shown to be beneficial and is now used in routine practice.(10) However, it is unclear whether these benefits apply to preterm babies who usually receive immediate neonatal care, and whether any benefits outweigh potential harms. In addition, there are multiple competing cord management strategies, such as clamping the cord at different times or milking the cord, and considerations of the infant's respiratory status, and it is currently unknown which strategy yields the best balance of benefits and harms.

### Current approaches to cord clamping

One potential mechanism of deferring umbilical cord clamping is a net transfer of blood from the placenta to the baby known as "placental transfusion". If the cord is not clamped at birth immediately, blood flow between the placenta and the baby may continue for up to five minutes in term infants.(11-13) For preterm births, blood flow may continue for longer,(14) since a greater proportion of fetoplacental circulating blood volume is still in the placenta.(15) This has led to time-based approaches to deferring cord clamping that have been shown to increase peak haematocrit and reduce the need for blood transfusions.(16) Yet, recent findings suggest that placental transfusion does not always occur - blood flow may continue without any net transfer, and sometimes net transfer may be to the placenta.(17) Initial neonatal care and stabilisation traditionally takes place on a resuscitation platform at the side of the room or in an adjacent room. Deferred cord clamping is thus often associated with a delay in neonatal care and this has led to concerns including delayed resuscitation and hypothermia (18) particularly for very preterm infants and infants assessed as requiring resuscitation. An alternate emerging strategy is to provide immediate neonatal care with the cord intact beside the woman using a mobile resuscitation trolley or on the mother's leg. (19-24)

Another potential mechanism of deferred clamping is allowing time for the infant to establish spontaneous breathing whilst still placentally supported. Immediate cord clamping before the infant has established breathing may be harmful since it can lead to large fluctuations in blood pressure, a period of hypoxia, and restricted cardiac function.(25) Animal and pilot human studies suggest that breathing and lung aeration before cord clamping can improve cardiovascular stability and oxygenation, and reduce intraventricular haemorrhage and infant mortality.(26-29) They also suggest that initial respiratory support before clamping the cord can improve cerebral oxygenation and blood pressure, and reduce cerebrovascular impairment compared with immediate cord clamping.(30, 31) This evidence has led to the rise of "physiological cord clamping" which defers clamping until after the onset of breathing. Yet, onset of breathing is not always easy to determine without the assistance of video or extra equipment, whilst timing to cord clamping can be easily measured. In an earlier study,(32) time of onset of breathing in preterm infants receiving gentle stimulation was related to time after birth – within a minute over 90% of preterm infants had begun spontaneous breathing.

1  
2  
3 Cord milking or stripping (pinching the umbilical cord close to the mother and moving the fingers  
4 towards the infant) may be a way to increase preterm blood volume without deferring clamping.(33)  
5 Yet, a preterm lamb model demonstrated that during cord milking there was a transient increase to  
6 carotid blood flow and pressure.(34) A recent trial comparing deferred cord clamping with cord milking  
7 was stopped early in the subgroup of extremely preterm infants (23-27 weeks), as the incidence of  
8 severe intraventricular haemorrhage was higher in the cord milking group.(35) Hence, the effect of cord  
9 milking in different populations needs further elucidation.  
10  
11

### 12 13 **Current guidelines for cord management at birth and previous reviews of aggregate data**

14  
15 Current uncertainties in optimal cord management strategies are reflected in varying guidelines. The  
16 World Health Organization (WHO) recommends late cord clamping (36) unless resuscitation is required,  
17 the National Institute for Health and Care Excellence (NICE) recommends waiting for 30 seconds to 3  
18 minutes if mother and baby are stable, (37) and the International Liaison Committee on Resuscitation  
19 Council (ILCOR) recommends a delay in cord clamping of at least 1 minute. If the baby is assessed as  
20 requiring resuscitation (which is the case in many preterm infants), (38) WHO recommends immediate  
21 clamping, (39) NICE recommends considering cord milking before clamping, and ILCOR concludes that  
22 there is insufficient evidence to make any recommendations. (38)  
23  
24

25  
26 A 2012 Cochrane review of timing of cord clamping for preterm births (40) included 15 trials, with 738  
27 infants, of which one trial (with 40 infants) compared cord milking with immediate cord clamping.(41)  
28 There was heterogeneity in the timing of cord clamping and gestational age at recruitment, and data  
29 were insufficient for reliable conclusions about any of the primary outcomes of the review. A systematic  
30 review and meta-analysis published in 2018 (including 18 trials with 2834 infants) compared the effect  
31 of deferred ( $\geq 30$  seconds) versus early ( $< 30$  seconds) clamping in preterm infants, and found a reduction  
32 in the primary outcome of hospital mortality by 32% (Risk Ratio = 0.68, 95% Confidence Interval = 0.52-  
33 0.90). (16) There was heterogeneity in the definition of 'early cord clamping' ranging from less than 5 to  
34 25 seconds, and "late cord clamping", ranging from 30 to 180 seconds. Recruitment age varied from 22  
35 weeks to 36 weeks gestational age. Most analyses of infant and maternal morbidity were substantially  
36 underpowered. (16) The review concluded that while there is high quality evidence that deferred cord  
37 clamping improves outcomes, individual participant data analyses are urgently needed to further  
38 understand the benefits and potential harms of different cord management strategies, and to  
39 understand whether differential treatment options are advantageous for key subgroups of infants. (16)  
40  
41

42  
43 This ongoing uncertainty about the optimal cord management strategy, and differential cord  
44 management strategies for key subgroups of infants (e.g. for those for which resuscitation and/or  
45 stabilisation is deemed necessary, or extremely preterm infants) has led to 117 planned, ongoing or  
46 published trials (in more than 15,000 preterm babies) that are comparing a range of cord management  
47 strategies. *Individual participant data (IPD) meta-analysis* is the gold standard for combining such trial  
48 data. IPD provides larger statistical power for estimation of treatment effects of rarer secondary  
49 endpoints and enables reliable subgroup analyses to examine hypotheses about differences in  
50 treatment effect, exploring interactions between treatment- and participant-level characteristics. (42)  
51 A *network meta-analysis (NMA)* facilitates data synthesis when there are a range of interventions  
52 available and permits indirect comparisons across all interventions by inferring the relative effectiveness  
53 of two competing treatments through a common comparator.(43, 44) NMA produces relative effect  
54  
55  
56  
57  
58  
59  
60



1  
2  
3 estimates for each intervention compared with every other intervention in the network. These effect  
4 sizes can be used to obtain rankings of the effectiveness of the interventions.(45) Using IPD in a NMA  
5 (as opposed to aggregate data) can improve precision, increase information, and reduce bias. (46)  
6  
7

## 8 **Objectives**

9  
10 The aims of this study are:

- 11  
12 1) to evaluate the effectiveness of cord management strategies for preterm infants on neonatal  
13 mortality and morbidity, and to evaluate patient-level modifiers of treatment effect.
- 14  
15 2) to evaluate, compare and rank the effectiveness of different cord management strategies for  
16 preterm infants on mortality and the key secondary outcomes intraventricular haemorrhage  
17 (any grade) and infant blood transfusions (any).  
18

## 19 **METHODS AND ANALYSIS**

20  
21  
22 We will conduct a systematic review of randomised trials with individual participant data using  
23 pairwise and network meta-analysis, and a nested prospective meta-analysis. The lead investigator for  
24 all potentially eligible studies will be contacted and invited to collaborate and join the individual  
25 participant data Cord Management at Preterm birth (iCOMP) Collaboration. Eligible trials identified up  
26 to February 2019 are listed in Supplementary File 1. The Collaboration will undertake this project  
27 according to the methods recommended by the Cochrane Individual Participant Data, Multiple  
28 Interventions, and Prospective Meta-Analysis Methods Groups.(42, 47, 48) This protocol is registered  
29 on the Australian New Zealand Clinical Trials Registry (ANZCTR, ACTRN12619001305112) and the  
30 International Prospective Register of Systematic Reviews (PROSPERO, CRD42019136640). Reporting  
31 guidelines for NMA protocols by Chaimani et al (49) and PRISMA extension for protocols (50, 51) have  
32 been followed for reporting (PRISMA-P checklist provided in Supplementary File 2).  
33  
34  
35  
36

### 37 **Eligibility criteria**

#### 38 **Types of studies**

39  
40  
41 Studies will be included if they are randomised trials. Cluster-randomised and quasi-random studies will  
42 be excluded. Studies must compare at least two of the interventions of interest (defined below).  
43  
44

#### 45 **Trial participants**

46  
47 Participants will be women giving birth preterm (before 37 completed weeks' gestation) and/or their  
48 babies. Individually randomised studies will be eligible for inclusion if the unit of randomisation was  
49 either the woman, or the baby. Women and babies will be included regardless of whether mode of  
50 delivery was vaginal or caesarean, and whether the birth was singleton or multiple. Correlations  
51 between multiples will be accounted for in the analyses. Babies will be included regardless of whether  
52 or not they received immediate resuscitation at birth.  
53  
54

#### 55 **Types of interventions and comparators in pairwise meta-analysis**

1  
2  
3 For the pairwise meta-analysis we will include all trials that compare an intervention to enhance  
4 umbilical blood flow or allow more time for physiological transition to the comparator immediate cord  
5 clamping. This includes interventions assessing cord management strategies for timing of cord clamping,  
6 and other strategies such as cord milking. Trials will be included regardless of whether initial neonatal  
7 care is provided with the umbilical cord intact, or not. Different strategies (i.e. deferred cord clamping  
8 and cord milking) will be analysed in separate subgroups to assess comparability between the groups  
9 by assessing subgroup effects and heterogeneity. They will then be collapsed into one “cord  
10 management intervention” group if they are deemed comparable based on the previous subgroup  
11 assessments. If they are deemed non-comparable they will be analysed and interpreted separately.  
12  
13  
14

#### 15 Types of interventions and comparators in network meta-analysis

16  
17 For the network meta-analysis we will include, as interventions of interest, strategies for timing of cord  
18 clamping, and other cord management strategies to influence umbilical flow and placental transfusion.  
19  
20

21 Thus, interventions of interest include:

- 22 • Immediate cord clamping without milking ( $\leq 15$  seconds or trialist defined)
- 23 • Short deferral of cord clamping ( $> 15$  to  $< 45$  seconds) without milking
- 24 • Medium deferral of cord clamping ( $\geq 45$  to  $< 90$  seconds) without milking
- 25 • Long deferral of cord clamping ( $\geq 90$  seconds) without milking
- 26 • Cord milking or stripping before immediate cord clamping (intact cord milking)
- 27 • Cord milking or stripping before deferred cord clamping (intact cord milking)
- 28 • Cord milking or stripping after immediate cord clamping (cut cord milking)
- 29 • Cord milking or stripping after deferred cord clamping (cut cord milking)
- 30 • Physiological clamping (clamping after aeration of lungs)

31  
32  
33  
34  
35  
36 If we identify other interventions not listed above we will include them if they are addressing cord  
37 management or related strategies to influence umbilical flow and placental transfusion. Again, trials  
38 will be included regardless of whether initial neonatal care is provided with the umbilical cord intact, or  
39 not. Studies evaluating collection and storage of residual placental blood that is then used for  
40 transfusion after birth will be excluded. All possible comparisons between eligible interventions are  
41 displayed in Figure 1. For interpretation purposes, immediate cord clamping will act as the basis  
42 comparison/ parameter.  
43  
44

45  
46 Nodes that specify different timings of cord clamping were defined according to what timing is classified  
47 as immediate clamping, short deferral, medium deferral or long deferral according to the literature to  
48 date (as shown in Supplementary File 1), and after discussion with clinicians. Different timings are  
49 commonly compared in head-to-head comparisons, hence, their classification as different intervention  
50 nodes. Similarly, nodes that specify cord milking were classified after a review of current milking  
51 techniques described in the literature and after discussion with clinicians. If insufficient data are  
52 available, categories will be collapsed where possible. For instance, milking before and after immediate  
53 cord clamping could be collapsed into one single immediate cord milking category, or medium and long  
54 delay could be collapsed into a medium to long delay category. We consider the interventions of interest  
55 to be jointly randomisable (i.e. each participant could, in principle, be randomised to any one of the  
56 interventions of interest).  
57  
58  
59  
60

## Types of outcome measures

Trials must report at least one of the clinical outcomes included in this review, as specified in the “measures” section below, to be included.

## Eligibility for nested prospective meta-analysis

Studies are only included in the nested prospective meta-analysis if the investigator/s were blind to outcome data by intervention group at the time the main components of the protocol (i.e. objectives, aims and hypotheses, eligibility criteria, subgroup and sensitivity analyses and main outcomes) were initially agreed in January 2015.

## Information sources and search strategy

The search strategy to identify potentially eligible studies includes a search of the Cochrane Collaboration Pregnancy and Childbirth Review Group’s Trial Register. This register contains trials identified from: monthly searches of the Cochrane Central Register of Controlled Trials (CENTRAL) and CINAHL (EBSCO); weekly searches of Medline (Ovid) and Embase (Ovid); hand searches of specialty journals and major conferences proceedings; and current awareness alerts from further journals and BioMed Central. Further details can be found elsewhere.<sup>(52)</sup> We will identify ongoing trials that may be eligible by searching for published protocols in Medline and Embase, searching online registries of clinical trials, and personal contacts (for example, by asking collaborators to notify any unregistered studies they are aware of). The Chief Investigators of eligible trials will be invited to join the iCOMP Collaboration. They will also be asked if they know of any further planned, ongoing or completed studies. Databases will be searched from their inception. Preliminary searches using this search strategy have already been completed up to 13 February 2019, but the search will be updated regularly to include additional trials. The search strategy is outlined in more detail in Supplementary File 3.

## Selection of studies for inclusion in the review

Two members of the iCOMP Secretariat (see project management section below) will independently assess all the potentially eligible studies identified for inclusion. Disagreements will be resolved by discussion or, if required, by consulting a third member of the iCOMP Secretariat. Studies that are not willing or able to provide IPD will be synthesised where possible using aggregate data.

## Data collection, management, and confidentiality

### Data receipt

Each participating trial will be asked to provide de-identified, individual participant level data. Clear instructions will be provided on which data are needed and the secure data transfer process. The preferred data format and coding for each variable will be supplied to the investigators, but data in any format that is most convenient will be accepted and recoded if necessary. Data management will comply with the University of Sydney Data Management Policy 2014, and has been approved by the University of Sydney Human Research Ethics Committee (2018/886). Depending on trialists’ preference, data transfer will either take place via secure data transfer platforms, or shared via

1  
2  
3 institutional secure email using password-protected zip-files. Data for this project will be stored in  
4 perpetuity in a password-protected folder within the NHMRC Clinical Trials Centre's network. Only  
5 authorised project team members working within the NHMRC Clinical Trials Centre will have access to  
6 these data.  
7  
8  
9

#### 10 Data processing

11 *Data checking:* For each trial, range and internal consistency of all variables will be checked. Intervention  
12 details and missing data will be checked against any protocols, published reports, and data collection  
13 sheets. Integrity of the randomisation process will be assessed by examining the chronological  
14 randomisation sequence and the balance of participant characteristics across intervention groups. Any  
15 inconsistencies or missing data will be discussed with the trialists and resolved by consensus. Each  
16 included study will be analysed separately and the results sent to the trial investigators for verification  
17 prior to inclusion in the iCOMP database. All trial-specific outcomes generated from the IPD will be cross-  
18 checked against published information via a series of crosstabs.  
19  
20  
21

22 *Data re-coding:* Outcome data may have been collected in different formats across trials. Therefore, the  
23 de-identified data from each of the trials will be extracted and re-formatted into a commonly coded  
24 dataset.  
25  
26

27 *Data transformation and collating:* Once the data from each of the trials are finalised, they will be  
28 combined into a single dataset, but a trial identifier code for each participant will be retained. New  
29 variables will be generated from the combined dataset as required to address the hypotheses to be  
30 tested.  
31  
32

#### 33 Risk of bias assessment and certainty of evidence appraisal

34 Eligible studies will be assessed for risk of bias using the criteria described in the Cochrane  
35 Handbook(53): random sequence generation; allocation concealment; blinding of participants and  
36 personnel; blinding of outcome assessment; incomplete outcome data; selective reporting; and other  
37 bias. Uncertainties will be resolved where possible by contacting study authors. Certainty of evidence  
38 will be appraised using the GRADE approach (54) for the pairwise comparisons, and the rating approach  
39 suggested by Salanti and colleagues that is implemented in the CINeMA application for the network  
40 meta-analysis.(55)  
41  
42  
43  
44

#### 45 Outcomes measures for pairwise meta-analysis

46 All outcome measures for the pairwise meta-analysis are listed in Table 1. The primary outcome will be  
47 death of the baby prior to hospital discharge. As outcomes for babies born very preterm (before 32  
48 weeks' gestation) are different to those born moderately preterm (32 to 37 weeks), separate analyses  
49 will be conducted for these two groups of infants for the secondary outcomes. Where possible,  
50 definitions will be standardised, otherwise outcomes will be used as defined in individual trials.  
51 Secondary outcomes will include measures of neonatal and maternal morbidity, and health service use.  
52  
53  
54  
55

#### 56 Covariates and subgroups for pairwise meta-analysis

1  
2  
3 Subgroup analyses will be conducted for the primary outcome of death (prior to hospital discharge) and  
4 two key secondary outcomes (IVH any grade and any infant blood transfusion). All included covariates  
5 and subgroups are listed in Table 1. The comparative effects of alternative cord management strategies  
6 may vary depending on key infant risk factors, and/or on the level and type of neonatal care available  
7 at the hospital of birth. Thus, there will be subgroup analyses based on participant level characteristics  
8 and based on hospital level characteristics. If data are insufficient for the pre-specified subgroup  
9 analyses, categories will be collapsed.  
10  
11

### 12 **Data analysis for pairwise meta-analysis**

13  
14  
15 The full Statistical Analysis Plan will be agreed on by the iCOMP Collaboration before any analyses are  
16 undertaken. Analyses will include all randomised participants for which data are available, and the  
17 primary analyses will be based on intention-to-treat. Analyses will be conducted using the open-source  
18 software R.(56)  
19

20  
21 For each outcome, a one-stage approach to analysis will be employed to include individual participant  
22 data from all eligible trials in a multilevel random or mixed effects regression model. Aggregate data will  
23 be included where individual participant data are unavailable.(57) Relative heterogeneity of treatment  
24 effects across trials will be estimated using  $I^2$ , with further inclusion in secondary models of participant  
25 level and trial level covariates to explain the sources of heterogeneity. Prediction intervals will be  
26 estimated to ascertain absolute heterogeneity. Forest plots will be presented by trial for the primary  
27 outcome, and for any secondary outcomes where there is evidence of heterogeneity across trials.  
28  
29

30  
31 We will use a generalised linear modelling framework, with the choice of outcome distribution and link  
32 function dependent on outcome type. For example, binomial with log link will be used to estimate risk  
33 ratios for binary outcomes, and Gaussian with identity link for mean differences, with log-  
34 transformation of the data if appropriate. We will follow a similar approach for secondary outcomes.  
35 For estimation of subgroup effects, we will present forest plots of pooled treatment effects according  
36 to pre-specified subgroup variables, and estimate effects by including appropriate interaction terms  
37 between a subgroup variable and treatment arm in the regression models. The results of all comparative  
38 analyses will be presented using appropriate estimates of treatment effect along with 95% confidence  
39 intervals and two-sided p-values.  
40  
41  
42

### 43 **Outcome measures for network meta-analysis**

44  
45  
46 The primary outcome for the network meta-analysis will be death of the baby during the initial hospital  
47 stay. If data availability permits, IVH (any grade) and blood transfusion (any) will be analysed as two key  
48 secondary outcomes.  
49

### 50 **Covariates and subgroups for network meta-analysis**

51  
52  
53 Subgroup analyses will be conducted for the primary outcome (death before discharge), and the two  
54 key secondary outcomes (IVH any grade, blood transfusion). Gestational week at birth and highest level  
55 of available care will be considered as effect modifiers to improve consistency of the NMA model. There  
56 will be subgroup analyses assessing treatment effect by week of gestational age, and by comparing  
57 babies assessed as in need of immediate resuscitation versus not in need of immediate resuscitation.  
58  
59

### Assessment of the transitivity assumption for network meta-analysis

Transitivity in the network will be assured by only including interventions that are regarded as jointly randomisable and by limiting our sample to preterm infants. Gestational age at birth, hospital setting (highest level of available neonatal care), as well as study year may act as effect modifiers and could influence the transitivity of the network. We will therefore investigate whether these variables are distributed evenly across comparisons. If we find any of those variables to be unevenly distributed, they will be included in the network as covariates to investigate their influence on the network and on possible inconsistency.

### Data analysis for network meta-analysis

As for the pairwise meta-analysis, all analyses will be specified a-priori in a full Statistical Analysis Plan, all randomised participants for which data are available will be included, and the primary analyses will be intention-to-treat. Again, aggregate data will be included where IPD are unavailable.

We will calculate a two-step random-effects contrast-based network meta-regression to compare and rank all available interventions for the primary outcome death (during initial hospital stay) and, for the two key secondary outcomes - IVH (any grade) and blood transfusion (any). Summary risk ratios with confidence and prediction intervals will be presented for each pairwise comparison in a league table. We will estimate the ranking probability of each intervention being at each rank, and we will use surface under the cumulative ranking curve (SUCRA) and mean ranks to obtain a treatment hierarchy. A frequentist approach to analysis will be used. Should models not converge, a Bayesian approach will be used instead, setting a weakly-informative prior  $d \sim N(0, 5)$ . Correlations induced by multi-arm studies will be accounted for using multivariate distributions.

As a second step, interactions between key covariates and effect estimates will be tested, assuming a common interaction across comparisons. If there are statistically significant interactions between covariates and treatment effects, we will provide probability rankings of intervention effects by subgroup for these covariates. A single heterogeneity parameter will be assumed for each network. Statistical heterogeneity will be assessed using the  $I^2$  statistic.

### Assessment of inconsistency for network meta-analysis

Global consistency will be assessed using the Q statistics for inconsistency and the design-by-treatment interaction model. Local consistency will be assessed using the loop-specific approach and the node-splitting approach to explore sources of inconsistency. Since tests of inconsistency are known to have low power, results will be interpreted with caution, and potential known sources for inconsistency will be explored even if there is no statistical evidence of inconsistency. Any detected inconsistency will be explored by including covariates specified above (gestational age at birth, hospital setting, as well as study year) into the model, and by excluding potential outlier studies in sensitivity analyses. In case of a judgement of excessive heterogeneity or inconsistency we would still report the resulting parameters, but would interpret the results as not reliable.

### Assessment of compliance with the allocated intervention

1  
2  
3 Compliance with the interventions will be described for each trial. For studies of early versus deferred  
4 cord clamping this will be based on i) the time to cord clamping in each allocated group, and ii) the  
5 difference in time between early and deferred clamping. For studies comparing cord milking with no  
6 milking, this will be based on i) time to cord clamping in the allocated groups, and ii) reported  
7 compliance with cord milking in both groups.  
8  
9

### 10 **Assessment of selection bias**

11  
12 We will perform a nested prospective meta-analysis as a sensitivity analysis, to detect potential  
13 differences between prospectively and retrospectively included studies that may point to selection or  
14 publication bias. We expect to also be able to include some unreported outcomes sourced from the  
15 individual participant data provided by the included studies, which may alleviate selective outcome  
16 reporting bias.(58) Additionally, comparison-adjusted and contour-enhanced funnel plots(59) will be  
17 utilised to examine whether there are differences in results between more and less precise studies.  
18  
19

### 20 **Adjustments for multiplicity**

21  
22 There is only one primary outcome, and few key secondary outcomes for this study. For other secondary  
23 outcomes, no formal adjustments for multiplicity (i.e. the accumulation of type 1 error and thus higher  
24 likelihood of chance findings when assessing multiple outcomes) are planned. Instead, we will be taking  
25 the following approach outlined by Schulz and Grimes(60): as secondary outcomes examined in this  
26 study are interrelated, we will interpret the pattern of results, examining consistency of results across  
27 related outcomes, instead of focusing on any single, statistically significant result. All secondary  
28 outcomes will be reported. Subgroup analyses will be performed by testing for interactions and findings  
29 will be reported as exploratory.(61)  
30  
31  
32  
33

### 34 **Planned sensitivity analyses**

35  
36 To assess whether results are robust to trial characteristics and methods of analysis, the following  
37 sensitivity analyses will be conducted for the primary outcome, if data are sufficient:  
38  
39

- 40 • Excluding trials with high risk of bias for sequence generation and/or concealment of allocation  
41 and/or loss to follow up for pairwise and network meta-analysis;
- 42 • Excluding trials with a significant conflict of interest (e.g. trials funded by pharmaceutical  
43 companies)
- 44 • For trials comparing early cord clamping with deferred clamping, analysis of outcomes  
45 weighted by degree of separation in mean actual timing of cord clamping between intervention  
46 and control groups for pairwise meta-analysis;
- 47 • Analysis of outcomes weighted by degree of separation in haemoglobin (at 24 hours) achieved  
48 between intervention and control groups for pairwise meta-analysis (as a surrogate for  
49 net placental transfusion);
- 50 • For trials with deferred cord clamping, an additional dose-response analysis assessing intended  
51 time of cord clamping deferral as a continuous variable will be performed;
- 52 • Exploratory analysis based on actual, rather than intended, timing of cord clamping for  
53 individual participants for pairwise and network meta-analysis;
- 54  
55  
56  
57  
58  
59  
60

- The impact of missing data on the effects of the included interventions for the primary outcome may be explored (if appropriate).

### **Project management**

The iCOMP Collaboration will invite membership from representatives of each of the included trials contributing individual participant data, have a Secretariat, and invite methodological and clinical experts who will form an Advisory Group. The Secretariat will be responsible for data collection, management and analysis, and for communication within the Collaboration.

### **Public and patient involvement**

Two consumer representatives have been invited to join the iCOMP collaboration, comment on this protocol and be involved in the interpretation of results.

### **Ethical issues**

For each included trial, ethics approval has been previously granted by their respective Human Research Ethics Committees (or equivalent), and informed consent has been obtained from all participants. The Chief Investigators of the included trials remain the custodians of their own trial's data. Individual participant data from the included trials will be de-identified before sharing with the iCOMP Collaboration. Ethics approval for this project has been granted by the University of Sydney Human Research Ethics Committee (number: 2018/886).

### **Publication policy**

The key methods for this meta-analysis protocol were agreed by the iCOMP Collaborators in January 2015, before unblinding of any outcome data from the studies included in the nested prospective meta-analysis. This manuscript was discussed at the iCOMP Collaborators' meeting held at the Pediatric Academic Societies meeting in San Diego in April 2015. At this meeting it was agreed the protocol should be expanded to include a retrospective systematic review and individual participant data and network meta-analysis with a nested prospective meta-analysis. The protocol was then revised, based on further discussion, and circulated to members of the iCOMP Collaboration for further comment and agreement prior to manuscript submission.

Participating trialists in the prospective meta-analysis, when reporting results from their own trials, will endeavour to include a statement that their trial is part of this prospective meta-analysis in any published manuscripts or conference abstracts. Any reports of the results of this meta-analysis will be published either in the name of the collaborative group, or by representatives of the collaborative group on behalf of the iCOMP Collaboration, as agreed by members of the collaborative group. Draft reports will be circulated to the collaborative group for comment and approval before submission for publication.



## DISCUSSION

There is an urgency to conduct this systematic review and pairwise individual participant data and network meta-analysis so we can make sense of the numerous trials currently being undertaken, inform clinical practice, and identify the most promising interventions for further evaluation.

This meta-analysis offers an opportunity to reliably test important hypotheses that cannot be resolved by any of the individual trials, either alone or in simple combination. Coordinating international efforts in this way will help achieve consensus on the most important substantive clinical outcomes to assess in any future trials as needed. Unequivocal synthesised results, together with the identification of key determinants (e.g. effect modifiers), will be critical for translating evidence from this meta-analysis directly into practice. Figure 2 shows the network of comparisons available from the trials identified to date. We plan to complete study identification and individual participant data collection by early-2020, then conduct the analyses and disseminate results by mid-2021. Trials that are ongoing and therefore unable to provide data by March 2020 will remain members of the iCOMP collaboration. Their data will be included in future updates of iCOMP.

This study is only possible because trialists around the world have agreed to collaborate to share the individual participant data from their cord management trials. This collaborative approach will enable us to move beyond the traditional “one-size-fits-all” and towards precision medicine, to find the optimal intervention from a range of treatment options for each individual woman and her baby, based on their individual characteristics and risk factors.

### Acknowledgements

Thanks to Sarah Somerset, Min Yang, Charlotte Lloyd, and Virginia Portillo for previous support for the Secretariat and input into earlier protocol drafts.

### Competing interests

None known.

### Non-financial competing interests

Lelia Duley, Anup Katheria, Catalina De Paco Matallana, Eugene Dempsey, Heike Rabe, John Kattwinkel, Judith Mercer, Justin Josephsen, Karen Fairchild, Ola Andersson, Shigeharu Hosono, Venkateshan Sundaram, Vikram Datta, Walid El-Naggar, and William Tarnow-Mordi are Chief Investigators for potentially eligible trials.

### Funding

Developing the protocol and establishing the collaborative group was supported by the UK National Institute of Health Research with a grant entitled “The Preterm Birth Programme” (number RPPG060910107). This grant presents independent research commissioned by the National Institute for Health Research (NIHR) under its Programme Grants for Applied Research funding scheme (RP-PG-0609-10107). The views expressed are those of the authors and not necessarily those of the NHS, the NIHR or the Department of Health. Funding for individual trials remains the responsibility of the trialists

1  
2  
3 themselves. Funding to undertake data collection and data analysis for the iCOMP Collaboration has  
4 been provided by the Australian National Health and Medical Research Council via a Project Grant  
5 (APP1163585).  
6

### 7 **Author contributions**

8  
9  
10 Duley and Askie conceived the idea. Seidler, Askie, and Duley drafted the protocol. All remaining  
11 authors (Katheria, De Paco Matallana, Dempsey, Rabe, Kattwinkel, Mercer, Josephsen, Fairchild,  
12 Andersson, Hosono, Sundaram, Datta, El-Naggar, Tarnow-Mordi, Debray, Hooper, Kluckow, Polglase,  
13 Davis, Montgomery, Hunter, Barba and Simes) critically revised all drafts of the manuscript for  
14 intellectual content, and agreed and approved the final manuscript. Seidler is the guarantor of the  
15 review.  
16  
17

### 18 **List of abbreviations**

19  
20 iCOMP – individual participant data on **C**ord **M**anagement at **P**reterm birth

21  
22 CENTRAL – Cochrane Central Register of Controlled Trials

23  
24 CINeMA – Confidence in Network meta-analysis

25  
26 CPAP – continuous positive airway pressure

27  
28 IPD – individual participant data

29  
30 NICE – National Institute for Health and Care Excellence

31  
32 NICU – neonatal intensive care unit

33  
34 NIHR – National Institute for Health Research

35  
36 NMA – network meta-analysis

37  
38 PRISMA – Preferred Reporting Items for Systematic Review and Meta-Analysis

39  
40 UK – United Kingdom

41  
42 WHO – World Health Organization

43  
44 ILCOR – International Liaison Committee on Resuscitation

45  
46 PROSPERO – International prospective register of systematic reviews  
47  
48  
49  
50  
51  
52  
53  
54  
55  
56  
57  
58  
59  
60

**iCOMP collaboration members:**

**Secretariat:** Anna Lene Seidler<sup>1</sup>, Lelia Duley<sup>2</sup>, Alan Montgomery<sup>2</sup>, Kylie E Hunter<sup>1</sup>, Angie Barba<sup>1</sup>, Ava Grace Tan-Koay<sup>1</sup>, Lisa Askie<sup>1</sup>

**Trialists:** Amir Kugelman<sup>3</sup>, Anu George<sup>4</sup>, Anu Sachdeva<sup>5</sup>, Anup Katheria<sup>6</sup>, Arjan Te Pas<sup>7</sup>, Ashish Kc<sup>8</sup>, Bimlesh Kumar<sup>9</sup>, Carl Backes<sup>10</sup>, Catalina De Paco Matallana<sup>11</sup>, Chamnan Tanprasertkul<sup>12</sup>, Chayatat Ruangkit<sup>13</sup>, Eugene Dempsey<sup>14</sup>, G Ram Mohan<sup>15</sup>, Gillian Gyte<sup>16</sup>, Guillermo Carroli<sup>17</sup>, Heidi Al-Wassia<sup>18</sup>, Hytham Atia<sup>19</sup>, Heike Rabe<sup>20</sup>, Islam Nour<sup>21</sup>, Jiangqin Liu<sup>22</sup>, John Bauer<sup>23</sup>, John Kattwinkel<sup>24</sup>, Judith Mercer<sup>25</sup>, Justin Josephsen<sup>26</sup>, Karen Fairchild<sup>24</sup>, Kellie Murphy<sup>27</sup>, Kristy Robledo<sup>1</sup>, Lakhbir Dhaliwal<sup>15</sup>, Laura Perretta<sup>28</sup>, Lin Ling<sup>29</sup>, Manoj Varanattu<sup>30</sup>, Maria Goya<sup>31</sup>, Michael Meyer<sup>32</sup>, Musa Silahli<sup>33</sup>, Neelam Kler<sup>34</sup>, Neil Finer<sup>35</sup>, Ola Andersson<sup>8</sup>, Omar Kamlin<sup>36</sup>, Peter Giannone<sup>37</sup>, Pharuhad Pongmee<sup>38</sup>, Prisana Panichkul<sup>39</sup>, Ronny Knol<sup>40</sup>, Sandeep Kadam<sup>41</sup>, Sangkae Chamnanvanakij<sup>39</sup>, Shigeharu Hosono<sup>42</sup>, Shiraz Badurdeen<sup>36</sup>, Simone Pratesi<sup>43</sup>, Thomas Ranjit<sup>44</sup>, Venkateshan Sundaram<sup>15</sup>, Victor Lago Leal<sup>45</sup>, Vikram Datta<sup>46</sup>, Waldemar Carlo<sup>47</sup>, Walid El-Naggar<sup>48</sup> & William Tarnow-Mordi<sup>1</sup>.

**Advisers:** Graeme Polglase<sup>49</sup>, John Simes<sup>1</sup>, Martin Kluckow<sup>49</sup>, Peter Davis<sup>336</sup>, Stuart Hooper<sup>49</sup>, Thomas P.A. Debray<sup>50</sup>.

<sup>1</sup> National Health and Medical Research Council Clinical Trials Centre, University of Sydney, Sydney, Australia

<sup>2</sup> Nottingham Clinical Trials Unit, University of Nottingham, Nottingham, UK

<sup>3</sup> Bnai Zion Medical Center, Haifa, Israel

<sup>4</sup> Malankara Orthodox Syrian Church Medical College, Kerala, India

<sup>5</sup> All India Institute of Medical Science, New Delhi, India

<sup>6</sup> Sharp Healthcare, San Diego, California, USA

<sup>7</sup> Leiden University, Leiden, Netherlands

<sup>8</sup> Uppsala University, Uppsala, Sweden

<sup>9</sup> Lala Lajpat Rai Memorial Medical College, Uttar Pradesh, India

<sup>10</sup> Ohio State University Wexner Medical Center, Columbus, Ohio, USA

<sup>11</sup> Clinic University Hospital Virgen de la Arrixaca, Murcia, Spain

<sup>12</sup> Thammasat University, Pathumthani, Thailand

<sup>13</sup> Mahidol University, Samut Prakan, Thailand

<sup>14</sup> Cork University Maternity Hospital, Cork, Ireland

<sup>15</sup> Post Graduate Institute of Medical Education & Research, Chandigarh, India

<sup>16</sup> Oldfield, Poulton le Fylde, UK

<sup>17</sup> Rosarino Center for Perinatal Studies, Rosario, Argentina

<sup>18</sup> King Abdulaziz University, Jeddah, Saudi Arabia

<sup>19</sup> Zagazig University, Zagazig, Egypt

<sup>20</sup> Brighton and Sussex Medical School, University of Sussex, Brighton, UK

<sup>21</sup> Mansoura University Children's Hospital, Mansoura, Egypt

<sup>22</sup> Tongji University School of Medicine, Shanghai, China

<sup>23</sup> University of Kentucky, Lexington, Kentucky, USA

<sup>24</sup> University of Virginia, Charlottesville, Virginia, USA

- 1  
2  
3 25 The University of Rhode Island, Kingston, Rhode Island, USA  
4 26 St Louis University School of Medicine, St. Louis, Missouri, USA  
5  
6 27 Mount Sinai Hospital, Toronto, Canada  
7 28 Weill Cornell Medical College, New York City, New York, USA  
8  
9 29 Suining Central Hospital, Sichuan, China  
10 30 Jubilee Mission Medical College & Research Centre, Kerala, India  
11 31 Vall d'Hebron University Hospital, Barcelona, Spain  
12 32 Middlemore Hospital, Auckland, New Zealand  
13  
14 33 Baskent University, Ankara, Turkey  
15 34 Sir Ganga Ram Hospital, New Delhi, India  
16 35 University of California, San Diego, California, USA  
17 36 The Royal Women's Hospital, Melbourne, Australia  
18 37 Ramathibodi Hospital, Mahidol University, Bangkok, Thailand  
19 38 Phramongkutkiao Hospital, Ratchathewi, Bangkok, Thailand  
20 39 Erasmus MC, University Medical Centre, Rotterdam, Netherlands  
21 40 KEM Hospital, Pune, Maharashtra, India  
22 41 Jichi Medical University Saitama Medical Center, Saitama, Japan  
23 42 University of Florence, Florence, Italy  
24 43 St John's Medical College & Hospital, Bangalore, Kamataka, India  
25 44 University Hospital of Getafe & European University of Madrid, Madrid, Spain  
26 45 Lady Hardinge Medical College, New Delhi, India  
27 46 University of Alabama at Birmingham, Birmingham, Alabama, USA  
28 47 Department of Pediatrics, Dalhousie University, Halifax, Canada  
29 48 The Ritchie Centre, Obstetrics & Gynaecology, Monash University, Melbourne, Australia  
30 49 Faculty of Medicine and Health, University of Sydney, Sydney, Australia  
31 50 Julius Center for Health Sciences and Primary Care, University Medical Center Utrecht, Utrecht, the  
32 Netherlands  
33  
34  
35  
36  
37  
38  
39  
40  
41  
42  
43  
44  
45  
46  
47  
48  
49  
50  
51  
52  
53  
54  
55  
56  
57  
58  
59  
60

## References

1. Blencowe H, Cousens S, Oestergaard MZ, Chou D, Moller AB, Narwal R, et al. National, regional, and worldwide estimates of preterm birth rates in the year 2010 with time trends since 1990 for selected countries: a systematic analysis and implications. *Lancet*. 2012;379(9832):2162-72.
2. March of Dimes P, Save the Children, WHO. Born too soon: the global action report on preterm birth. Geneva: World Health Organisation; 2012.
3. Chang HH, Larson J, Blencowe H, Spong CY, Howson CP, Cairns-Smith S, et al. Preventing preterm births: analysis of trends and potential reductions with interventions in 39 countries with very high human development index. *Lancet*. 2013;381(9862):223-34.
4. Petrou S, Mehta Z, Hockley C, Cook-Mozaffari P, Henderson J, Goldacre M. The impact of preterm birth on hospital inpatient admissions and costs during the first 5 years of life. *Pediatrics*. 2003;112(6 Pt 1):1290-7.
5. Mangham LJ, Petrou S, Doyle LW, Draper ES, Marlow N. The cost of preterm birth throughout childhood in England and Wales. *Pediatrics*. 2009;123(2):e312-27.
6. Zeitlin J, Draper ES, Kollee L, Milligan D, Boerch K, Agostino R, et al. Differences in rates and short-term outcome of live births before 32 weeks of gestation in Europe in 2003: results from the MOSAIC cohort. *Pediatrics*. 2008;121(4):e936-44.
7. Bhutta AT, Cleves MA, Casey PH, Cradock MM, Anand KJS. Cognitive and Behavioral Outcomes of School-Aged Children Who Were Born Preterm: A Meta-analysis. *JAMA*. 2002;288(6):728-37.
8. Aarnoudse-Moens CS, Weisglas-Kuperus N, van Goudoever JB, Oosterlaan J. Meta-analysis of neurobehavioral outcomes in very preterm and/or very low birth weight children. *Pediatrics*. 2009;124(2):717-28.
9. Anderson P, Doyle LW. Neurobehavioral outcomes of school-age children born extremely low birth weight or very preterm in the 1990s. *JAMA*. 2003;289(24):3264-72.
10. International Liaison Committee on Resuscitation (ILCOR). Neonatal Resuscitation- Part 7. 2015 International Consensus on Cardiopulmonary Resuscitation and Emergency Cardiovascular Care Science with Treatment Recommendations. In: Perlman JM, Wyllie J & Kattwinkel et al. *Circulation*. 2015;132(suppl 1):S204-S41.
11. Farrar D, Airey R, Law GR, Tuffnell D, Cattle B, Duley L. Measuring placental transfusion for term births: weighing babies with cord intact. *BJOG*. 2011;118(1):70-5.
12. Boere I, Roest A, E W, ten Harkel A, Haak M, Morley C, et al. Umbilical blood flow patterns directly after birth before delayed cord clamping. *Arch Dis Child Fetal Neonatal Ed*. 2015;100:F121-F125. doi:10.1136/archdischild-2014-307144.
13. Yao A, Moinian M, Lind J. Distribution of blood between infant and placenta after birth. *The Lancet*. 1969;294(7626):871-3.
14. Saigal S, O'Neill A, Surainder Y, Chua LB, Usher R. Placental transfusion and hyperbilirubinemia in the premature. *Pediatrics*. 1972;49(3):406-19.
15. Dawes GS. Foetal and neonatal physiology; a comparative study of the changes at birth [by] Geoffrey S. Dawes. Chapter 13: Chicago, Year Book Medical Publishers; 1968. 247 p. illus. 27 cm. p.
16. Fogarty M, Osborn DA, Askie L, Seidler AL, Hunter K, Lui K, et al. Delayed vs early umbilical cord clamping for preterm infants: a systematic review and meta-analysis. *American Journal of Obstetrics and Gynecology*. 2018;218(1):1-18.
17. Vijayaselvi R, Abraham A, Kumar M, Kuruvilla A, Mathews J, Duley L. Measuring umbilical flow and placental transfusion for preterm births: weighing babies at 33-36 weeks gestation with cord intact. 1st congress of joint European Neonatal Societies. 2015.
18. Committee Opinion No. 684: Delayed Umbilical Cord Clamping After Birth. *Obstetrics & Gynecology*. 2017;129(1):e5-e10.
19. Schoonakker B, Dorling, J., Oddie, S., Batra, D., Grace, N., Duley, L, editor Bedside resuscitation of preterm infants with cord intact is achievable using standard resuscitaire. Available at

1  
2  
3 p430 of

4 [https://www.eiseverywhere.com/file\\_uploads/9206db9fe962868d47f709b38365ec5e\\_9349\\_abstract](https://www.eiseverywhere.com/file_uploads/9206db9fe962868d47f709b38365ec5e_9349_abstract_book_-_25sett13-it-it.pdf)

5 [book - 25sett13-it-it.pdf](https://www.eiseverywhere.com/file_uploads/9206db9fe962868d47f709b38365ec5e_9349_abstract_book_-_25sett13-it-it.pdf). European Society for Pediatric Research; 2013; Oporto, Portugal.

6 20. Thomas M, Yoxall C, Weeks A, Duley L. Providing newborn resuscitation at the mother's  
7 bedside: assessing the safety, usability and acceptability of a mobile trolley. *BMC Pediatrics*.

8 2014;14:135.

9 21. Duley L, Dorling J, Pushpa-Rajah A, Oddie SJ, Yoxall CW, Schoonakker B, et al. Randomised trial  
10 of cord clamping and initial stabilisation at very preterm birth. *Archives of Disease in Childhood - Fetal*  
11 *and Neonatal Edition*. 2018;103(1):F6-F14.

12 22. Sawyer A, Ayers S, Bertullies S, Thomas M, Weeks AD, Yoxall CW, et al. Providing immediate  
13 neonatal care and resuscitation at birth beside the mother: parents' views, a qualitative study. *BMJ*  
14 *Open*. 2015;5(9).

15 23. Yoxall CW, Ayers S, Sawyer A, Bertullies S, Thomas M, D Weeks A, et al. Providing immediate  
16 neonatal care and resuscitation at birth beside the mother: clinicians' views, a qualitative study. *BMJ*  
17 *Open*. 2015;5(9).

18 24. Schoonakker B, . Dorling, J., Oddie, S., Batra, D., Grace, N., Duley, L. Bedside resuscitation of  
19 preterm infants with cord intact is achievable using standard resuscitaire. Available at p430 of  
20 [https://www.eiseverywhere.com/file\\_uploads/9206db9fe962868d47f709b38365ec5e\\_9349\\_abstract](https://www.eiseverywhere.com/file_uploads/9206db9fe962868d47f709b38365ec5e_9349_abstract_book_-_25sett13-it-it.pdf)  
21 [book - 25sett13-it-it.pdf](https://www.eiseverywhere.com/file_uploads/9206db9fe962868d47f709b38365ec5e_9349_abstract_book_-_25sett13-it-it.pdf). European Society for Pediatric Research. 2013.

22 25. Kluckow M, Hooper SB. Using physiology to guide time to cord clamping. *Seminars in Fetal and*  
23 *Neonatal Medicine*. 2015;20(4):225-31.

24 26. Bhatt S, Alison BJ, Wallace EM, Crossley KJ, Gill AW, Kluckow M, et al. Delaying cord clamping  
25 until ventilation onset improves cardiovascular function at birth in preterm lambs. *The Journal of*  
26 *physiology*. 2013;591(8):2113-26.

27 27. Ersdal HL, Linde J, Mduma E, Auestad B, J P. Neonatal outcome following cord clamping after  
28 onset of spontaneous respiration. *Pediatrics*. 2014;134:265-72.

29 28. Nevill E, MP M. Effect of delayed cord clamping (DCC) on breathing and transition at birth in  
30 very preterm infants. *Early Hum Dev* 2015;91:407-11.

31 29. Polglase GR, Dawson JA, Kluckow M, Gill AW, Davis PG, te Pas AB, et al. Ventilation Onset Prior  
32 to Umbilical Cord Clamping (Physiological-Based Cord Clamping) Improves Systemic and Cerebral  
33 Oxygenation in Preterm Lambs. *PLOS ONE*. 2015;10(2):e0117504.

34 30. Polglase GR, Blank DA, Barton SK, Miller SL, Stojanovska V, Kluckow M, et al. Physiologically  
35 based cord clamping stabilises cardiac output and reduces cerebrovascular injury in asphyxiated near-  
36 term lambs. *Arch Dis Child Fetal Neonatal Ed*. 2017;<https://doi.org/10.1136/archdischild-2017-313657>  
37 [Epub ahead of print].

38 31. Katheria AC, Brown MK, Faksh A, Hassen KO, Rich W, Lazarus D, et al. Delayed Cord Clamping  
39 in Newborns Born at Term at Risk for Resuscitation: A Feasibility Randomized Clinical Trial. *The Journal*  
40 *of Pediatrics*. 2017;187:313-7.e1.

41 32. Katheria A, Poeltler D, Durham J, Steen J, Rich W, Arnell K, et al. Neonatal Resuscitation with  
42 an Intact Cord: A Randomized Clinical Trial. *Journal of Pediatrics*. 2016;178:75-80.e3.

43 33. Hosono S, Mugishima H, Fujita H, Hosono A, Minato M, Okada T, et al. Umbilical cord milking  
44 reduces the need for red cell transfusions and improves neonatal adaptation in infants born at less  
45 than 29 weeks' gestation: a randomised controlled trial. *Arch Dis Child Fetal Neonatal Ed*.  
46 2008;93(1):F14-9.

47 34. Blank DA, Polglase GR, Kluckow M, Gill AW, Crossley KJ, Moxham A, et al. Haemodynamic  
48 effects of umbilical cord milking in premature sheep during the neonatal transition. *Archives of*  
49 *Disease in Childhood - Fetal and Neonatal Edition*. 2017.

50 35. Katheria AC, Reister F, Hummler H, Essers J, Mendler M, Truong G, et al. LB 1: Premature  
51 Infants Receiving Cord Milking or Delayed Cord Clamping: A Randomized Controlled Non-inferiority  
52 Trial. *American Journal of Obstetrics & Gynecology*. 2019;220(1):S682.

- 1
- 2
- 3 36. WHO. WHO Recommendations for the Prevention and Treatment of Postpartum
- 4 Haemorrhage. Geneva: World Health Organization. 2012.
- 5 37. National Institute for Health and Care Excellence. Preterm labour and birth. London; 2015.
- 6 38. European Resuscitation Council Guidelines for Resuscitation 2015 Section 7. Resuscitation and
- 7 support of transition of babies at birth.
- 8 39. World Health Organisation. Guideline: delayed umbilical cord clamping for improved maternal
- 9 and infant health and nutrition outcomes. Geneva, Switzerland; 2014.
- 10 40. Rabe H, Diaz-Rossello JL, Duley L, Dowswell T. Effect of timing of umbilical cord clamping and
- 11 other strategies to influence placental transfusion at preterm birth on maternal and infant outcomes.
- 12 Cochrane Database Syst Rev. 2012;8:CD003248.
- 13 41. Hosono S, Mugishima H, Fujita H, Hosono A, Minato M, Okada T, et al. Umbilical cord milking
- 14 reduces the need for red cell transfusions and improves neonatal adaptation in infants born at less
- 15 than 29 weeks' gestation: a randomised controlled trial. Arch Dis Child Fetal Neonatal Ed.
- 16 2008;93(1):F14-9.
- 17 42. Stewart LA, Tierney JF, Clarke M, on behalf of the Cochrane Individual Patient Data Meta-
- 18 analysis Methods Group. Chapter 18: Reviews of individual patient data. In: Higgins J, Green S, editors.
- 19 Cochrane Handbook for Systematic Reviews of Interventions: Version 5.1.0 [updated March 2011]. The
- 20 Cochrane Collaboration, 2011. Available: [www.cochrane-handbook.org](http://www.cochrane-handbook.org).
- 21 43. Caldwell DM, Ades AE, Higgins JP. Simultaneous comparison of multiple treatments:
- 22 combining direct and indirect evidence. Bmj. 2005;331(7521):897-900.
- 23 44. Lumley T. Network meta-analysis for indirect treatment comparisons. Statistics in medicine.
- 24 2002;21(16):2313-24.
- 25 45. Sutton A, Ades AE, Cooper N, Abrams K. Use of indirect and mixed treatment comparisons for
- 26 technology assessment. PharmacoEconomics. 2008;26(9):753-67.
- 27 46. Debray TP, Schuit E, Efthimiou O, Reitsma JB, Ioannidis JP, Salanti G, et al. An overview of
- 28 methods for network meta-analysis using individual participant data: when do benefits arise?
- 29 Statistical methods in medical research. 2018;27(5):1351-64.
- 30 47. Gherzi D, Berlin J, Askie L. Chapter 19: Prospective meta-analysis. In: Higgins J, Green S,
- 31 editors. Cochrane Handbook for Systematic Reviews of Interventions: Version 5.1.0 [updated March
- 32 2011]. The Cochrane Collaboration, 2011. Available: [www.cochrane-handbook.org](http://www.cochrane-handbook.org).
- 33 48. Higgins J, Deeks J, Altman D. Ch. 16.6: Indirect comparisons and multiple-treatments meta-
- 34 analysis. Cochrane Handbook for Systematic Reviews of Interventions: Cochrane Collaboration; 2011.
- 35 49. Chaimani A, Caldwell DM, Li T, Higgins JP, Salanti G. Additional considerations are required
- 36 when preparing a protocol for a systematic review with multiple interventions. Journal of clinical
- 37 epidemiology. 2017;83:65-74.
- 38 50. Moher D, Shamseer L, Clarke M, Gherzi D, Liberati A, Petticrew M, et al. Preferred reporting
- 39 items for systematic review and meta-analysis protocols (PRISMA-P) 2015 statement. Systematic
- 40 Reviews. 2015;4(1):1.
- 41 51. Stewart LA, Clarke M, Rovers M, Riley RD, Simmonds M, Stewart G, et al. Preferred Reporting
- 42 Items for a Systematic Review and Meta-analysis of Individual Participant Data: The PRISMA-IPD
- 43 StatementPRISMA Extension for Individual Patient DataPRISMA Extension for Individual Patient Data.
- 44 JAMA. 2015;313(16):1657-65.
- 45 52. CPaCG. Detailed search methods used to maintain and update the Specialised Register
- 46 [Available from:
- 47 [https://pregnancy.cochrane.org/sites/pregnancy.cochrane.org/files/public/uploads/Cochrane%20Preg-](https://pregnancy.cochrane.org/sites/pregnancy.cochrane.org/files/public/uploads/Cochrane%20Pregnancy%20and%20Childbirth%20Group%20search%20methods%20for%20Intervention%20reviews_0.pdf)
- 48 [nancy%20and%20Childbirth%20Group%20search%20methods%20for%20Intervention%20reviews\\_0.p](https://pregnancy.cochrane.org/sites/pregnancy.cochrane.org/files/public/uploads/Cochrane%20Pregnancy%20and%20Childbirth%20Group%20search%20methods%20for%20Intervention%20reviews_0.pdf)
- 49 [df](https://pregnancy.cochrane.org/sites/pregnancy.cochrane.org/files/public/uploads/Cochrane%20Pregnancy%20and%20Childbirth%20Group%20search%20methods%20for%20Intervention%20reviews_0.pdf) last accessed July 31, 2018.
- 50 53. Higgins J, Green S. Cochrane handbook for systematic reviews of interventions. Oxford: Wiley-
- 51 Blackwell; 2008.
- 52
- 53
- 54
- 55
- 56
- 57
- 58
- 59
- 60

- 1  
2  
3 54. Guyatt G, Oxman AD, Akl EA, Kunz R, Vist G, Brozek J, et al. GRADE guidelines: 1.  
4 Introduction—GRADE evidence profiles and summary of findings tables. *Journal of clinical*  
5 *epidemiology*. 2011;64(4):383-94.  
6 55. Salanti G, Higgins JP, Ades A, Ioannidis JP. Evaluation of networks of randomized trials.  
7 *Statistical Methods in Medical Research*. 2008;17(3):279-301.  
8 56. Bhatt S, Alison BJ, Wallace EM, Crossley KJ, Gill AW, Kluckow M, et al. Delaying cord clamping  
9 until ventilation onset improves cardiovascular function at birth in preterm lambs. *The Journal of*  
10 *physiology*. 2013;591(8):2113-26.  
11 57. Riley RD, Steyerberg EW. Meta-analysis of a binary outcome using individual participant data  
12 and aggregate data. *Research Synthesis Methods*. 2010;1(1):2-19.  
13 58. Tierney JF, Stewart LA, Clarke M, on behalf of the Cochrane Individual Participant Data Meta-  
14 analysis Methods Group. Chapter 26: Individual participant data. In: Higgins JPT TJ, Chandler J,  
15 Cumpston M, Li T, Page MJ, Welch VA, editor. *Cochrane Handbook for Systematic Reviews of*  
16 *Interventions* version 60 (updated July 2019). Cochrane, 2019. Available from  
17 [www.training.cochrane.org/handbook](http://www.training.cochrane.org/handbook). [last accessed 15 January 2020].  
18 59. Peters JL, Sutton AJ, Jones DR, Abrams KR, Rushton L. Contour-enhanced meta-analysis funnel  
19 plots help distinguish publication bias from other causes of asymmetry. *Journal of clinical*  
20 *epidemiology*. 2008;61(10):991-6.  
21 60. Schulz KF, Grimes DA. Multiplicity in randomised trials I: endpoints and treatments. *Lancet*  
22 (London, England). 2005;365(9470):1591-5.  
23 61. Schulz KF, Grimes DA. Multiplicity in randomised trials II: subgroup and interim analyses.  
24 *Lancet* (London, England). 2005;365(9471):1657-61.  
25  
26  
27  
28  
29  
30  
31  
32  
33  
34  
35  
36  
37  
38  
39  
40  
41  
42  
43  
44  
45  
46  
47  
48  
49  
50  
51  
52  
53  
54  
55  
56  
57  
58  
59  
60



1  
2  
3 **Figure headings**  
4

5 **Figure 1. Network of possible comparisons between cord management interventions**  
6

7  
8 **Figure 2. Illustration of network of currently available trials comparing different timing of cord**  
9 **clamping.**  
10  
11  
12  
13  
14  
15  
16  
17  
18  
19  
20  
21  
22  
23  
24  
25  
26  
27  
28  
29  
30  
31  
32  
33  
34  
35  
36  
37  
38  
39  
40  
41  
42  
43  
44  
45  
46  
47  
48  
49  
50  
51  
52  
53  
54  
55  
56  
57  
58  
59  
60

For peer review only

Table 1. Measures for individual participant data pairwise meta-analysis

| <b>Outcomes</b>                                         |                                                                                                                                                                                                                                                                                                                                                                                                                                                                                                                                                                                                                                                                                                                                                                                                                                                                                                                                                                                                                                                                                                                                                                                                                                                                                                                                                                            |
|---------------------------------------------------------|----------------------------------------------------------------------------------------------------------------------------------------------------------------------------------------------------------------------------------------------------------------------------------------------------------------------------------------------------------------------------------------------------------------------------------------------------------------------------------------------------------------------------------------------------------------------------------------------------------------------------------------------------------------------------------------------------------------------------------------------------------------------------------------------------------------------------------------------------------------------------------------------------------------------------------------------------------------------------------------------------------------------------------------------------------------------------------------------------------------------------------------------------------------------------------------------------------------------------------------------------------------------------------------------------------------------------------------------------------------------------|
| <b>For all infants</b>                                  |                                                                                                                                                                                                                                                                                                                                                                                                                                                                                                                                                                                                                                                                                                                                                                                                                                                                                                                                                                                                                                                                                                                                                                                                                                                                                                                                                                            |
| Primary outcome                                         | <ul style="list-style-type: none"> <li>• Death prior to hospital discharge</li> </ul>                                                                                                                                                                                                                                                                                                                                                                                                                                                                                                                                                                                                                                                                                                                                                                                                                                                                                                                                                                                                                                                                                                                                                                                                                                                                                      |
| <b>For infants born before 32 weeks' gestation</b>      |                                                                                                                                                                                                                                                                                                                                                                                                                                                                                                                                                                                                                                                                                                                                                                                                                                                                                                                                                                                                                                                                                                                                                                                                                                                                                                                                                                            |
| Key secondary outcomes                                  | <ul style="list-style-type: none"> <li>• Death (at any time during duration of follow-up)</li> <li>• Severe intraventricular haemorrhage on cranial ultrasound (grade 3-4)</li> <li>• All grades of intraventricular haemorrhage on cranial ultrasound</li> <li>• Necrotizing enterocolitis <math>\geq</math> grade 2 (or trialist definition)</li> <li>• Late onset sepsis (where possible defined as clinical sepsis &gt; 72 hour after birth)</li> <li>• Patent ductus arteriosus requiring treatment (medical and/or surgical)</li> <li>• Chronic lung disease (at 36 weeks' postmenstrual age or trialist defined)</li> <li>• Blood transfusion (yes/no)</li> </ul>                                                                                                                                                                                                                                                                                                                                                                                                                                                                                                                                                                                                                                                                                                   |
| Other secondary outcomes                                | <ul style="list-style-type: none"> <li>• Death (within 7 days)</li> <li>• Other forms of white matter brain injury (e.g. periventricular leukomalacia, porencephaly)</li> <li>• Respiratory support (mechanical ventilation, CPAP, low nasal flow oxygen)</li> <li>• Duration of respiratory support</li> <li>• Supplemental oxygen at 36 weeks</li> <li>• Retinopathy of prematurity requiring treatment (medical and/or surgical)</li> <li>• Drug treatment for hypotension (yes/no)</li> <br/> <li>• Blood transfusion (number, volume)</li> <li>• Hypothermia on admission to neonatal unit</li> <li>• Haemoglobin</li> <li>• Haematocrit</li> <li>• Polycythaemia</li> <li>• Jaundice requiring treatment</li> <li>• Birthweight</li> <li>• Length of stay in Neonatal Intensive Care Unit (NICU)/ Special Care Unit (SCU)</li> <li>• Length of stay in hospital</li> <li>• Apgar scores at 1 and 5 minutes</li> <li>• Long term developmental disability (assessed using the Bayley III, and/or other tools): <ul style="list-style-type: none"> <li>○ cerebral palsy</li> <li>○ neurodevelopmental disability</li> <li>○ score on cognitive scale</li> <li>○ score on language scale</li> <li>○ score on social/emotional scale</li> <li>○ score on motor scale</li> <li>○ score on behaviour scale</li> <li>○ deafness</li> <li>○ blindness</li> </ul> </li> </ul> |
| <b>For infants born at or after 32 weeks' gestation</b> |                                                                                                                                                                                                                                                                                                                                                                                                                                                                                                                                                                                                                                                                                                                                                                                                                                                                                                                                                                                                                                                                                                                                                                                                                                                                                                                                                                            |

|                                                                                                                                                                   |                                          |                                                                                                                                                                                                                                                                                                                                                                                                                                                                                                                                                                                                                                                                                                                                                                                                                                                                                                                                                                                                                                                                                                                                  |
|-------------------------------------------------------------------------------------------------------------------------------------------------------------------|------------------------------------------|----------------------------------------------------------------------------------------------------------------------------------------------------------------------------------------------------------------------------------------------------------------------------------------------------------------------------------------------------------------------------------------------------------------------------------------------------------------------------------------------------------------------------------------------------------------------------------------------------------------------------------------------------------------------------------------------------------------------------------------------------------------------------------------------------------------------------------------------------------------------------------------------------------------------------------------------------------------------------------------------------------------------------------------------------------------------------------------------------------------------------------|
| 1<br>2<br>3<br>4<br>5<br>6                                                                                                                                        | Key secondary outcomes                   | <ul style="list-style-type: none"> <li>• Death at any time (during duration of follow-up)</li> <li>• Admission to NICU</li> <li>• Blood transfusion (any, number, volume)</li> </ul>                                                                                                                                                                                                                                                                                                                                                                                                                                                                                                                                                                                                                                                                                                                                                                                                                                                                                                                                             |
| 7<br>8<br>9<br>10<br>11<br>12<br>13<br>14<br>15<br>16<br>17<br>18<br>19<br>20<br>21<br>22<br>23<br>24<br>25<br>26<br>27<br>28<br>29<br>30<br>31<br>32<br>33<br>34 | Other secondary outcomes                 | <ul style="list-style-type: none"> <li>• Death (within 7 days)</li> <li>• Haemoglobin</li> <li>• Haematocrit</li> <li>• Jaundice requiring treatment</li> <li>• Length of stay in NICU/SCU</li> <li>• Length of stay in hospital</li> <li>• Duration of respiratory support (mechanical ventilation, CPAP, low flow nasal oxygen)</li> <li>• Chronic lung disease</li> <li>• Late onset sepsis (&gt; 72 hour after birth)</li> <li>• Patent ductus arteriosus requiring treatment (medical and/or surgical)</li> <li>• Drug treatment for hypotension</li> <li>• Hypothermia on admission to neonatal unit or postnatal ward</li> <li>• Apgar score at 1 and 5 minutes</li> <li>• Long term developmental disability (assessed using the Bayley III, and/or other tools): <ul style="list-style-type: none"> <li>○ cerebral palsy</li> <li>○ neurodevelopmental disability</li> <li>○ score on cognitive scale</li> <li>○ score on language scale</li> <li>○ score on social/emotional scale</li> <li>○ score on motor scale</li> <li>○ score on behaviour scale</li> <li>○ deafness</li> <li>○ blindness</li> </ul> </li> </ul> |
| 35                                                                                                                                                                | <b>For all women</b>                     |                                                                                                                                                                                                                                                                                                                                                                                                                                                                                                                                                                                                                                                                                                                                                                                                                                                                                                                                                                                                                                                                                                                                  |
| 36<br>37<br>38<br>39<br>40<br>41<br>42<br>43<br>44<br>45<br>46                                                                                                    | Secondary outcomes                       | <ul style="list-style-type: none"> <li>• Maternal death</li> <li>• Postpartum haemorrhage</li> <li>• Postnatal sepsis requiring treatment</li> <li>• Manual removal of placenta</li> <li>• Retained placenta</li> <li>• Not breast feeding when baby discharged from hospital</li> <li>• Postnatal depression</li> <li>• Blood transfusion</li> </ul>                                                                                                                                                                                                                                                                                                                                                                                                                                                                                                                                                                                                                                                                                                                                                                            |
| 47                                                                                                                                                                | <b>Covariates/ Subgroups</b>             |                                                                                                                                                                                                                                                                                                                                                                                                                                                                                                                                                                                                                                                                                                                                                                                                                                                                                                                                                                                                                                                                                                                                  |
| 48                                                                                                                                                                | <i>Participant-level characteristics</i> |                                                                                                                                                                                                                                                                                                                                                                                                                                                                                                                                                                                                                                                                                                                                                                                                                                                                                                                                                                                                                                                                                                                                  |
| 49<br>50<br>51<br>52<br>53<br>54<br>55<br>56<br>57<br>58<br>59<br>60                                                                                              |                                          | <ul style="list-style-type: none"> <li>• Gestation at birth</li> <li>• Type of pregnancy: singleton; multiple</li> <li>• Maternal age</li> <li>• Mode of birth: caesarean before onset of labour; caesarean after onset of labour; vaginal</li> <li>• Onset of labour: spontaneous onset or spontaneous prelabour ruptured membranes; not spontaneous onset or spontaneous prelabour ruptured membranes; not known whether spontaneous onset of labour or spontaneous prelabour ruptured membranes</li> </ul>                                                                                                                                                                                                                                                                                                                                                                                                                                                                                                                                                                                                                    |

|                                               |                                                                                                                                                                                                                                                                                                                                                                                                                                                                                                                                                                                                                                                                                                                                                                                                                                                                                                                                                                                                                                                                              |
|-----------------------------------------------|------------------------------------------------------------------------------------------------------------------------------------------------------------------------------------------------------------------------------------------------------------------------------------------------------------------------------------------------------------------------------------------------------------------------------------------------------------------------------------------------------------------------------------------------------------------------------------------------------------------------------------------------------------------------------------------------------------------------------------------------------------------------------------------------------------------------------------------------------------------------------------------------------------------------------------------------------------------------------------------------------------------------------------------------------------------------------|
|                                               | <ul style="list-style-type: none"> <li>• Type of breathing onset: spontaneous breathing onset; supported lung aeration (ventilation); unknown</li> <li>• Time of breathing onset relative to cord clamping: before cord clamping/milking; after cord clamping/milking; unknown</li> <li>• Sex (male, female, uncertain/other)</li> <li>• Ethnicity (trialist defined)</li> <li>• Small for gestational age (trialist defined): yes/no</li> <li>• Maternal antenatal/intrapartum sepsis requiring treatment (trialist defined): yes/no</li> <li>• Assessed as needing resuscitation and/or stabilisation (yes/no)</li> <li>• Type of uterotonic drug (if any)</li> </ul>                                                                                                                                                                                                                                                                                                                                                                                                      |
| <i>Hospital / trial-level characteristics</i> |                                                                                                                                                                                                                                                                                                                                                                                                                                                                                                                                                                                                                                                                                                                                                                                                                                                                                                                                                                                                                                                                              |
|                                               | <ul style="list-style-type: none"> <li>• Highest level of neonatal unit available at site: neonatal intensive care unit, neonatal unit (some capacity to provide ventilation), special care baby unit (no ventilation available), no neonatal unit or special care baby unit</li> <li>• Planned timing of uterotonic drug: before cord clamping; after/at cord clamping; timing mixed or not known</li> <li>• Planned position of the baby relative to the placenta whilst cord intact: level with placenta (between level of woman's bed and her abdomen/anterior thigh); more than 20 cm below level of placenta; position mixed or not known</li> <li>• Need for immediate resuscitation at birth: infants requiring immediate resuscitation at birth excluded; infants requiring immediate resuscitation at birth included; unclear whether infants requiring immediate resuscitation at birth included or excluded</li> <li>• Type of consent waiver of consent: deferred consent; informed consent or assent; type of consent unclear</li> <li>• Study year</li> </ul> |

Medium deferral of cord clamping  
(≥45 to <90 seconds) without  
milking

Short deferral of cord clamping  
(>15 to <45 seconds) without  
milking

Immediate cord  
clamping without milking  
(≤15 seconds or trialist  
defined)

Physiological  
clamping  
(clamping after  
aeration of lungs)

Cord milking or stripping  
after deferred cord  
clamping

Cord milking or stripping after immediate  
cord clamping

Cord milking or  
stripping before  
deferred cord  
clamping

- 1
- 2
- 3
- 4
- 5 Long deferral of
- 6 cord clamping (≥90
- 7 seconds) without
- 8 milking
- 9
- 10
- 11 Cord milking or
- 12 stripping before
- 13 immediate cord
- 14 clamping
- 15
- 16
- 17
- 18
- 19
- 20

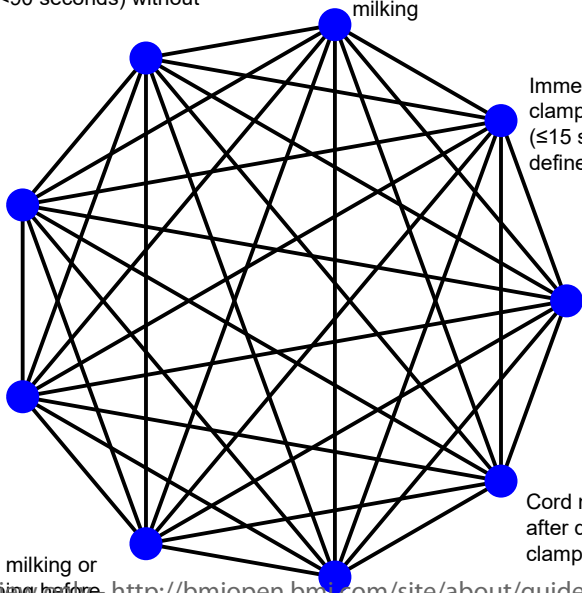

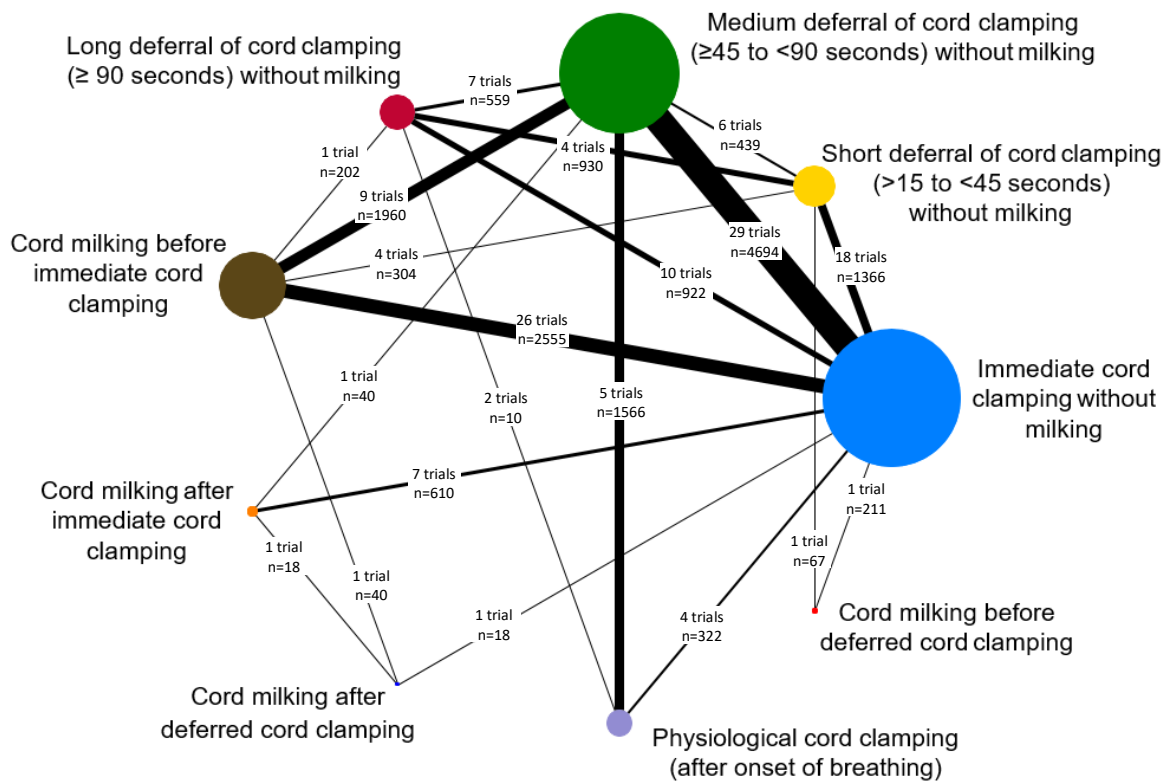

review only

## iCOMP Trial Master List January 2020

This table shows all trials that we have identified as being eligible for inclusion in iCOMP. All trials that are part of the iCOMP collaboration have been marked in blue.

**Table:** Eligible randomised trials to date for the pairwise & network meta-analysis with individual participant data on Cord Management at Preterm Birth (iCOMP)

| Trial Country (PI)                   | Publication year                     | Start year/ completion year | Sample size           | Participants                                         | Intervention                                                                                                                                                                                | Comparator                      | Primary outcome/s                                 |
|--------------------------------------|--------------------------------------|-----------------------------|-----------------------|------------------------------------------------------|---------------------------------------------------------------------------------------------------------------------------------------------------------------------------------------------|---------------------------------|---------------------------------------------------|
| Argentina [1]<br>(Carroli)           | n/a                                  | 2016/2020                   | 700                   | Singletons, 24-30 <sup>6</sup><br>weeks' GA          | DCC: at 90 sec                                                                                                                                                                              | DCC: ~30 sec                    | Sepsis (proven and very probable)                 |
| Australia [2]<br>(Badurdeen)         | n/a                                  | 2018/2020                   | 120 (not all preterm) | ≥32 weeks' GA*,<br>require resuscitation at delivery | DCC: resuscitation prior to cord clamping (for PPV, clamping delayed until at least 60 sec after colour change of pedicap/neostat; for CPAP, clamping occurs at least 2 min after delivery) | ICC (followed by resuscitation) | Average heart rate between 60-120 sec after birth |
| Australia [3]<br>(McDonnell)         | 1997                                 | 1994/1994                   | 46                    | 26 to 33 weeks' GA                                   | DCC: 30 sec                                                                                                                                                                                 | ICC                             | Venous haematocrit                                |
| Australia [4]<br>(Kamlin)            | n/a                                  | 2014/2015                   | 27 (not all preterm)  | 32-42 weeks' GA*                                     | Arm 1: DCC at 90-180 sec<br>Arm 2: DCC 10 sec after crying and breathing established                                                                                                        | DCC: <60 sec                    | Heart rate 90 sec after birth                     |
| Australia [5]<br>(Tarnow-Mordi 2009) | n/a<br>(Pilot for Tarnow-Mordi 2017) | 2009/2010                   | 100                   | <32 weeks' GA                                        | Arm 1: Cord milking during resuscitation - cord cut long (3cm from placenta/introitus)<br>Arm 2: DCC at 30-60 sec. If baby in extremis, immediate clamping.                                 | ICC: within 10 sec              | Haemoglobin 6 hours after birth                   |

| Trial Country (PI)                | Publication year | Start year/ completion year | Sample size          | Participants                                                                                                            | Intervention                                                                   | Comparator                               | Primary outcome/s                                                                                                                                                                                                                  |
|-----------------------------------|------------------|-----------------------------|----------------------|-------------------------------------------------------------------------------------------------------------------------|--------------------------------------------------------------------------------|------------------------------------------|------------------------------------------------------------------------------------------------------------------------------------------------------------------------------------------------------------------------------------|
|                                   |                  |                             |                      |                                                                                                                         | Arm 3: DCC at 30-60 sec + milking                                              |                                          |                                                                                                                                                                                                                                    |
| Australia [6] (Tarnow-Mordi 2017) | 2017             | 2010/2017                   | 1634                 | <30 weeks' GA                                                                                                           | DCC: ≥60 sec                                                                   | ICC within 10 sec                        | Composite: Death or major morbidity (severe brain injury, severe ROP, NEC, or late onset sepsis) at 36 weeks' PMA                                                                                                                  |
| Austria [7] (Urlesberger)         | n/a              | 2018/2021                   | 80 (not all preterm) | ≥28 weeks' GA*, caesarean                                                                                               | DCC: <30 sec, cord milking after long clamping at 30cm, 1x 10cm/sec            | Standard care (cord cutting, no milking) | Changes in cerebral blood volume within 15 min after birth                                                                                                                                                                         |
| Bangladesh [8] (Yasmeen)          | 2014             | 2012/2013                   | 40                   | <37 weeks' GA                                                                                                           | DCC: 3 minutes                                                                 | DCC: 1 minute                            | Haemoglobin, iron and ferritin                                                                                                                                                                                                     |
| Canada [9] (Chu/Murphy)           | n/a              | 2007/2010                   | 296                  | Singletons, 24-32 weeks' GA                                                                                             | DCC: at 30-45 sec                                                              | ICC                                      | Composite: IVH or late onset sepsis                                                                                                                                                                                                |
| Canada [10] (El-Naggar)           | 2018             | 2011/2014                   | 73                   | 24-30 <sup>6</sup> weeks' GA                                                                                            | UCM: x3, at or below the level of the placenta, ~20 cm milked, before clamping | ICC                                      | Systemic blood flow (Superior vena cava flow at 4-6 hours after birth)                                                                                                                                                             |
| Canada [11] (Saigal)**            | 1972             | n/a                         | 125 (preterm)        | Premature infants 28-36 weeks GA and weighing 1020g-3250g OR full-term infants 28-42 weeks GA and weighing 2685g-4350g* | Arm 1: DCC at 1min<br>Arm 2: DCC at 5min                                       | ICC                                      | RBC volume, blood volume, haematocrit, plasma volume                                                                                                                                                                               |
| China [12] (Dai)                  | 2014             | n/a                         | 52 (preterm)         | Singletons, term and preterm infants*                                                                                   | DCC: Wait until cord pulsation ceased                                          | ICC: 5-10 sec                            | RBC count (72-96 hrs after birth), Anaemia (2 wks), clinically significant pathological polycythaemia, white blood cell count (72-96 hrs after birth), fetal bilirubin from birth to day 5, jaundice within 24 hrs of birth, Apgar |



| Trial Country (PI) | Publication year       | Start year/ completion year | Sample size               | Participants                                                                                                      | Intervention                                                                                                                                                                                             | Comparator                                                                                                   | Primary outcome/s                                                                                         |
|--------------------|------------------------|-----------------------------|---------------------------|-------------------------------------------------------------------------------------------------------------------|----------------------------------------------------------------------------------------------------------------------------------------------------------------------------------------------------------|--------------------------------------------------------------------------------------------------------------|-----------------------------------------------------------------------------------------------------------|
|                    |                        |                             |                           |                                                                                                                   |                                                                                                                                                                                                          |                                                                                                              | (1 min, 5 min), respiratory distress, rectal temperature 5 min after birth, neonate well-being at 1 month |
| China [13] (Dong)  | 2016                   | 2015/2015                   | 90                        | Singletons, <32 weeks' GA                                                                                         | DCC: 45 sec                                                                                                                                                                                              | ICC: <10 sec                                                                                                 | Severe IVH – grades 3 and 4                                                                               |
| China [14] (Hao)   | n/a                    | 2018/2019                   | 48                        | 30-31 <sup>6</sup> weeks' GA                                                                                      | UCM                                                                                                                                                                                                      | DCC                                                                                                          | Cerebral haemodynamics 15 min after birth                                                                 |
| China [15] (Hu)    | 2015 (master's thesis) | n/a                         | 120                       | 28-35 weeks' GA, vaginal birth                                                                                    | Arm 1: DCC at 30 sec<br>Arm 2: DCC at 60 sec<br>Arm 3: DCC at 120 sec                                                                                                                                    | ICC < 10 sec                                                                                                 | Haematocrit and haemoglobin levels at 24 hrs and 1 wk after birth                                         |
| China [16] (Hua)   | 2010?                  | 2009/2011                   | 176 (49 of those preterm) | Any GA*                                                                                                           | <u>Normal birth</u><br>Arm 1: DCC – wait until cord ceases pulsing<br>Arm 2: DCC – at 90 sec<br><u>Asphyxia</u><br>Arm 1: DCC – wait until cord ceases pulsing, resuscitate on bed site with cord intact | <u>Normal birth</u><br>ICC <10 sec<br><u>Asphyxia</u><br>ICC <10 sec, resuscitate after on irradiation table | Haemoglobin 1 month after birth                                                                           |
| China [17] (Li)    | 2018                   | 2017/2017                   | 102                       | delivered vaginally between 28 <sup>0</sup> -36 <sup>6</sup> weeks', and premature prolonged rupture of membranes | UCM: x4 at a speed of 10cm/sec, then clamped                                                                                                                                                             | ICC                                                                                                          | Incidence of certain or probable infection in neonates                                                    |
| China [18] (Liu)   | n/a                    | 2019/2019                   | 948 (not all preterm)     | 34 <sup>0</sup> -38 <sup>6</sup> weeks' GA*, caesarean section                                                    | DCC: 60 sec                                                                                                                                                                                              | ICC: within 10 sec                                                                                           | Rate of respiratory distress within 24 hours after birth                                                  |
| China [19] (Shi)   | 2017                   | n/a                         | 60 preterm (and 460 term) | Single foetus deliveries*                                                                                         | DCC                                                                                                                                                                                                      | ICC: 5-10 sec                                                                                                | Hemoglobin (newborn cord blood & after 24 hrs), neonatal complications, bleeding volume, third labour     |

| Trial Country (PI)       | Publication year | Start year/ completion year | Sample size            | Participants                          | Intervention                                                                                  | Comparator                         | Primary outcome/s                                                                                                                                                                                                   |
|--------------------------|------------------|-----------------------------|------------------------|---------------------------------------|-----------------------------------------------------------------------------------------------|------------------------------------|---------------------------------------------------------------------------------------------------------------------------------------------------------------------------------------------------------------------|
|                          |                  |                             |                        |                                       |                                                                                               |                                    | time, incidence of placental adhesion and peeling                                                                                                                                                                   |
| China [20] (Xie)         | n/a              | 2017/2019                   | 300                    | Singletons, <34 weeks' GA             | UCM: x2-3, 25cm/2 sec, below placenta level, before clamping                                  | ICC                                | Haemoglobin, Haematocrit, and ferritin level at 48 hours                                                                                                                                                            |
| Egypt [21] (Allam)       | n/a              | 2018/2019                   | 210                    | Singletons, 30-34 weeks' GA           | DCC: until cord stops pulsing or 1-2 min                                                      | ICC: <5 sec                        | Fetal haemoglobin, bilirubin, death                                                                                                                                                                                 |
| Egypt [22] (Nour 2017a)  | n/a              | 2017/2019                   | 90                     | <34 weeks' GA                         | UCM: x3 at 10cm/sec, below placenta level, cord held 20-25cm from baby                        | ICC                                | Peripheral venous CD34 at admission                                                                                                                                                                                 |
| Egypt [23] (Nour 2017b)  | n/a              | 2017/2018                   | 90                     | <34 weeks' GA                         | Arm 1: ICC, with placental insufficiency<br>Arm 2: DCC at 60sec, with placental insufficiency | Normal placenta with DCC at 60 sec | Peripheral venous CD34 at admission                                                                                                                                                                                 |
| Germany [24] (Nelle)     | 1998             | n/a                         | 19                     | PT <1500g*, born by caesarean section | DCC: 30 sec, 30 cm below placenta                                                             | ICC                                | Mean Blood Pressure, left ventricular output, mean cerebral blood flow velocity in the arteria carotis interna, haemoglobin, haematocrit, systemic and cerebral haemoglobin transport, systemic vascular resistance |
| Germany [25] (Rabe 2000) | 2000             | 2006/2008                   | 40                     | <33 weeks' GA                         | DCC: 45 sec                                                                                   | DCC: 20 sec                        | Feasibility, effects on post-partal adaption and anaemia of prematurity                                                                                                                                             |
| India [26] (Aghai 2018)  | n/a              | 2018/2020                   | 1400 (not all preterm) | Depressed neonates, 35-42 weeks' GA*  | UCM: x4, 30cm over 2 sec                                                                      | ICC: immediately after birth       | Number of infants with moderate to severe HIE or death                                                                                                                                                              |
| India [27] (Anusha)      | n/a              | 2017/2019                   | 148                    | birth weight <1500g*                  | DCC: 30 sec                                                                                   | ICC: within 10 sec                 | Haemodynamic stability, haematological status, serum ferritin, and requirement of                                                                                                                                   |

| Trial Country (PI)        | Publication year | Start year/ completion year | Sample size           | Participants                                       | Intervention                                                                                                          | Comparator         | Primary outcome/s                                                              |
|---------------------------|------------------|-----------------------------|-----------------------|----------------------------------------------------|-----------------------------------------------------------------------------------------------------------------------|--------------------|--------------------------------------------------------------------------------|
|                           |                  |                             |                       |                                                    |                                                                                                                       |                    | blood transfusion between birth and 6 months of age                            |
| India [28] (Bhriguvanshi) | n/a              | 2017/2018                   | 236                   | > 28 weeks' GA, requiring resuscitation*           | UCM: x3 towards baby at 10cm/sec, then clamped                                                                        | ICC: within 30 sec | Haemoglobin and haematocrit at birth and 6 weeks of age                        |
| India [29] (Chopra)       | 2018             | 2013/2015                   | 142                   | growth retarded babies (IUGR) $\geq$ 35 weeks' GA* | DCC: 60 sec                                                                                                           | ICC: 10 sec        | Haemoglobin and ferritin levels                                                |
| India [30] (Das/Sundaram) | 2018             | 2012/2013                   | 461                   | 30-33 <sup>6</sup> weeks' GA                       | DCC: 60 sec below placenta. If baby depressed, immediate clamping keeping cord long, milked x2-3 during resuscitation | ICC: within 10 sec | Composite of mortality or abnormal neurological examination at 40 weeks PMA    |
| India [31] (Datta)        | 2017             | 2011/2013                   | 120                   | Singletons, 34-36 <sup>6</sup> weeks' GA           | DCC: at >30-<60 sec                                                                                                   | ICC: <20 sec       | Neurobehavioural Assessment of Preterm Infant at 37 weeks' post-conceptual age |
| India [32] (Dhaliwal)     | 2014             | n/a                         | 300                   | 34-37 weeks' GA                                    | DCC: 60 sec                                                                                                           | ICC: <10 sec       | Risk of neonatal mortality & abnormal neurological examination at 40 weeks' GA |
| India [33] (Dipak)        | 2017             | 2012/2013                   | 78                    | 27-31 <sup>6</sup> weeks' GA                       | Arm 1: DCC: 60 sec<br>Arm 2: DCC: 60 sec with intramuscular ergometrine                                               | ICC: <10 sec       | Hematocrit 4 h after birth                                                     |
| India [34] (George/Isac)  | n/a              | 2017/2018                   | 180 (not all preterm) | Mothers at 34-40 <sup>6</sup> weeks' GA*           | UCM: milking whole length at 10cm/sec x3, then clamped                                                                | ICC                | Infant haemoglobin and haematocrit at 72hrs and 6 weeks                        |
| India [35] (Gupta)        | n/a              | 2018/2020                   | 110                   | <34 weeks' GA                                      | DCC: 30 sec                                                                                                           | ICC                | Ferritin and PCV at 8 weeks                                                    |
| India [36] (Kumar)        | 2015             | 2013/2014                   | 200                   | 32-36 <sup>6</sup> weeks' GA, vaginal or caesarean | UCM: x3, 10cm/sec                                                                                                     | ICC                | Haemoglobin and ferritin at 1.5 months                                         |

| Trial Country (PI)                   | Publication year | Start year/ completion year | Sample size           | Participants                                                                         | Intervention                                                                 | Comparator                  | Primary outcome/s                                                      |
|--------------------------------------|------------------|-----------------------------|-----------------------|--------------------------------------------------------------------------------------|------------------------------------------------------------------------------|-----------------------------|------------------------------------------------------------------------|
| India [37]<br>(Ram Mohan)            | 2018             | 2015/2016                   | 60                    | <37 weeks' GA, requiring resuscitation                                               | UCM: 20-25 cm umbilical cord x3 at 10cm/sec within 30 sec of birth           | No milking                  | Haemoglobin and serum ferritin at 6 weeks                              |
| India [38]<br>(Rana/Agarwal)         | 2018             | 2013/2013                   | 100                   | <34 weeks' GA                                                                        | DCC: 120 sec                                                                 | ICC: ≤30 sec                | serum total bilirubin and haematocrit levels at 48 hrs and 7 days      |
| India [39]<br>(Ranjit)               | 2015             | 2010/2010                   | 100                   | 30-36 <sup>6</sup> weeks' GA                                                         | DCC: >2min                                                                   | ICC                         | Haematocrit and serum ferritin at 6 weeks                              |
| India [40]<br>(Kumar Mangla/Thukral) | n/a              | 2016/2017                   | 144 (not all preterm) | Late preterm and term neonates*                                                      | Deferred UCM: cord clamped at 60 sec                                         | UCM: Cord milking in 10 sec | Venous haematocrit at 48 hours of life                                 |
| India [41]<br>(Upadhyay 2010)        | 2013             | 2010/2011                   | 170 (not all preterm) | >35 weeks' GA*                                                                       | UCM: x3 at 10cm/sec, then clamped at ~25 cm of length within 30 sec of birth | ICC: <30 sec                | Haemoglobin and serum ferritin at 6 weeks                              |
| India [42]<br>(Varanattu)            | n/a              | 2018/2019                   | 250                   | <32 weeks' GA                                                                        | UCM: x3 over 20 sec at 20cm/2sec with 2 second pause between                 | ICC: clamped immediately    | Haemoglobin levels at birth and IVH (incidence and severity) at 7 days |
| Iran [43]<br>(Armanian)              | 2017             | 2014/2015                   | 63                    | ≤34 weeks' GA                                                                        | DCC: at 30-45 sec                                                            | ICC: at 5-10 sec            | Time of cord clamping                                                  |
| Iran [44]<br>(Mojaveri)              | 2017             | 2014/2015                   | 70                    | <32 weeks' GA, caesarean, birth weight < 1500g, not requiring advanced resuscitation | DCC: at 30-45 sec                                                            | ICC: <10 sec                | IVH (days 3 to 7), survival infant (up to 28 days)                     |
| Iran [45]<br>(Mirzaeian)             | n/a              | 2017/2018                   | 160                   | 28-34 weeks' GA                                                                      | UCM: milked x3 in 10 sec                                                     | ICC                         | Amount of transfused blood, bilirubin levels                           |
| Iran [46]<br>(Sekhavat)              | 2008             | n/a                         | 52                    | 26-34 weeks' GA                                                                      | DCC: 30-60 sec                                                               | ICC: 10-15 sec              | Blood pressure, haematocrit, blood glucose                             |

| Trial Country (PI)       | Publication year | Start year/ completion year | Sample size | Participants                 | Intervention                                                                                                                                             | Comparator                         | Primary outcome/s                                                                                                                                                                                    |
|--------------------------|------------------|-----------------------------|-------------|------------------------------|----------------------------------------------------------------------------------------------------------------------------------------------------------|------------------------------------|------------------------------------------------------------------------------------------------------------------------------------------------------------------------------------------------------|
| Iran [47] (Shahgheibi)   | n/a              | 2017/2018                   | 90          | Women with preterm labour    | DCC: 180 sec                                                                                                                                             | DCC: 30 sec                        | blood parameters, weaning from ventilator, NICU discharge time                                                                                                                                       |
| Ireland [48] (Dempsey)   | n/a              | 2015/2016                   | 45          | <32 weeks' GA                | Arm 1: DCC at 60 sec on mobile resuscitation trolley at/below placenta level<br>Arm 2: UCM – Cord stripped 3 times at 20cm/2 sec at/below placenta level | ICC: <20 sec                       | Neonatal: Brain activity (6 & 12 hours post-partum, EEG and NIRS)<br>Maternal: hemoglobin at 24-36 hours post-partum                                                                                 |
| Israel [49] (Kugelman)   | 2007             | 2004/2005                   | 65          | 24-35 <sup>6</sup> weeks' GA | DCC: 30-45 sec, below placenta level                                                                                                                     | ICC: <10 sec                       | Haematocrit, blood pressure                                                                                                                                                                          |
| Italy [50] (Pratesi)     | 2018             | 2016/2017                   | 40          | 23-29 <sup>6</sup> weeks' GA | Bedside assistance with intact placental circulation                                                                                                     | UCM: x4, 10cm/sec, before clamping | Feasibility (recruitment rate, compliance, completeness, receiving echographic assessment) and safety                                                                                                |
| Japan [51] (Hosono 2008) | 2008             | 2001/2002                   | 40          | 24-28 weeks' GA, singletons  | UCM: 20 cm of the cord, x2-3, before clamping, 20cm/2sec                                                                                                 | ICC                                | Probability of not needing transfusion, number of RBC transfusions                                                                                                                                   |
| Japan [52] (Hosono 2016) | 2016             | 2008/2016                   | 203         | 24-27 <sup>6</sup> weeks' GA | UCM: cord cut 30 cm from infant, cord milked x1                                                                                                          | ICC: <30 sec                       | 1) Probability needing transfusion and death<br>2) Amount of blood transfusion first 4 weeks                                                                                                         |
| Korea [53] (Song)        | 2017             | 2012/2015                   | 66          | 24-32 <sup>6</sup> weeks' GA | UCM: x4 at 20cm/2sec, with 2 sec pause between                                                                                                           | ICC: immediately after delivery    | Short term safety: Apgar score, prevalence of hypothermia, early intubation, initial blood gas analyses, bilirubin levels, duration of phototherapy, use of cross-transfusion, respiratory distress. |

| Trial Country (PI)              | Publication year | Start year/ completion year | Sample size            | Participants                                        | Intervention                                                                                                                                                                                                       | Comparator                                                                           | Primary outcome/s                                                                                                                                                   |
|---------------------------------|------------------|-----------------------------|------------------------|-----------------------------------------------------|--------------------------------------------------------------------------------------------------------------------------------------------------------------------------------------------------------------------|--------------------------------------------------------------------------------------|---------------------------------------------------------------------------------------------------------------------------------------------------------------------|
| Macedonia [54] (Zisovska)       | 2008             | n/a                         | 57                     | Premature newborns                                  | DCC: 1 min                                                                                                                                                                                                         | ICC                                                                                  | Hematological parameters, number of RBC transfusions                                                                                                                |
| Nepal [55] (Andersson)          | 2017             | 2014/2017                   | 540 (not all preterm)  | 34-41 weeks' GA*                                    | DCC: at ≤180 sec                                                                                                                                                                                                   | ICC: ≤30 sec                                                                         | Haemoglobin at 8±1 months                                                                                                                                           |
| Nepal [56] (Ashish KC)          | n/a              | 2016/2016                   | 1510 (not all preterm) | Singletons, normal vaginal delivery, ≥33 weeks' GA* | DCC: at 180 sec                                                                                                                                                                                                    | DCC: <60 sec                                                                         | Neonatal heart rate continuously until 10 min after birth and at 1,3&5 min                                                                                          |
| Netherlands [57] (Knol)         | n/a              | 2018/2019                   | 64                     | <32 weeks' GA                                       | Physiology-based cord clamping: stabilisation while the cord is intact, cord clamped when infant is respiratory stable (regular spontaneous breathing, heart rate >100 bpm, oxygen >90%, supplemental oxygen <40%) | ICC/DCC: immediately or delayed 30-60 sec, depending on clinical condition of infant | Time needed to stabilise the infant                                                                                                                                 |
| Netherlands [58] (Te Pas)       | n/a              | 2019/2020                   | 660                    | <30 weeks' GA                                       | Physiology-based cord clamping: Resuscitation with cord intact, clamp when infant is stable (heart rate >100 bpm, oxygen >85%, supplemental oxygen <40%)                                                           | ICC/DCC: immediately or delayed 30-60 sec, depending on clinical condition of infant | Intact survival at NICU discharge without cerebral injury (IVH ≥ grade 2 and/or PVL ≥ grade 2 and/or periventricular venous infarction) and/or NEC (Bell stage ≥ 2) |
| Netherlands [59] (Ultee)        | 2008             | n/a                         | 37                     | 34 to 36 <sup>6</sup> weeks' GA                     | DCC: 3 min                                                                                                                                                                                                         | ICC: <30 sec                                                                         | blood glucose levels at 1,2, and 3hrs of age, haemoglobin and haematocrit at 1hr and 10 weeks, ferritin at 10 weeks                                                 |
| New Zealand [60] (Meyer/Nevill) | n/a              | 2016/2020                   | 120                    | <31 weeks' GA, not breathing regularly at 15sec     | Positive pressure ventilation and continuous positive                                                                                                                                                              | DCC: 50sec with thermal wrap                                                         | RBC transfusion rates                                                                                                                                               |

| Trial Country (PI)               | Publication year | Start year/ completion year | Sample size           | Participants                    | Intervention                                             | Comparator                                                                              | Primary outcome/s                                                                                                            |
|----------------------------------|------------------|-----------------------------|-----------------------|---------------------------------|----------------------------------------------------------|-----------------------------------------------------------------------------------------|------------------------------------------------------------------------------------------------------------------------------|
|                                  |                  |                             |                       |                                 | airway pressure until cord clamping at 50s               |                                                                                         |                                                                                                                              |
| Pakistan [61] (Malik)            | 2013             | 2009-2009                   | 80                    | 30-37 weeks' GA                 | DCC: 120 sec                                             | DCC: 30 sec                                                                             | Haematocrit                                                                                                                  |
| Saudi Arabia [62] (Al-Wassia)    | n/a              | 2017/2019                   | 180                   | <32 weeks' GA                   | UCM: milked 20cm segment over 2-3 sec x3                 | DCC: 60 sec                                                                             | IVH at 28 days                                                                                                               |
| Saudi Arabia [63] (Gomaa)        | n/a              | 2016/2018                   | 200                   | 24 to 34 <sup>6</sup> weeks' GA | DCC: 45-60 sec, baby at level or below placenta          | UCM: milked x4-5 from maternal end of cord to baby abdomen, 2 sec pause between milking | Haematological parameters - haematocrit                                                                                      |
| South Africa [64] (Hofmeyr 1988) | 1988             | n/a                         | 38                    | Singleton, <35 weeks' GA        | Arm 1: DCC at 60sec<br>Arm 2: DCC at 60sec + ergometrine | ICC                                                                                     | PVH/IVH at 6-72hrs after birth, Apgar score at 5min, birthweight, systolic blood pressure at 5min, cord blood gas and death. |
| South Africa [65] (Hofmeyr 1993) | 1993             | n/a                         | 86                    | <2000 g birthweight*            | DCC: 1-2 min                                             | ICC                                                                                     | death of the baby, PVH/IVH at 6-72hrs after birth, Apgar score at 5min, cord-pH, bilirubin                                   |
| South Africa [66] (Tiemersma)    | 2015             | 2012/2012                   | 104 (not all preterm) | Birth weight <2500g ± 500g*     | DCC: 2-3 minutes                                         | ICC: within 30 sec                                                                      | Haemoglobin from cord blood and at 2 months                                                                                  |
| Spain [67] (De Paco Matallana)   | n/a              | 2011/2014                   | 100                   | 24- 34 weeks' GA                | DCC: 45-60 sec                                           | ICC: <10 sec                                                                            | Neonatal haemoglobin, haematocrit and bilirubin levels (within 7 days after birth)                                           |
| Spain [68] (Domingo Puiggrós)    | n/a              | 2014/2016                   | 40                    | <34 weeks' GA, caesarean        | UCM: x3 at 20 cm/2sec                                    | DCC: 30 sec                                                                             | Haemoglobin at 1 and 24 hrs                                                                                                  |

| Trial Country (PI)             | Publication year | Start year/ completion year | Sample size           | Participants                                  | Intervention                                                                             | Comparator         | Primary outcome/s                                                           |
|--------------------------------|------------------|-----------------------------|-----------------------|-----------------------------------------------|------------------------------------------------------------------------------------------|--------------------|-----------------------------------------------------------------------------|
| Spain [69] (Leal)              | 2019             | 2013/2016                   | 138                   | 24 <sup>0</sup> -36 <sup>6</sup> weeks' GA    | UCM: nearly 20cm cord milked towards umbilicus x4 before clamping                        | ICC: <20 sec       | Requirement of RBC transfusions or phototherapy                             |
| Spain [70] (Socias)            | n/a              | 2014/2017                   | 150                   | 26-32 <sup>6</sup> weeks' GA                  | DCC: 30-60 sec                                                                           | ICC: <30sec        | RBC transfusions (number & volume), IVH, postpartum haemorrhage             |
| Switzerland [71] (Baenziger)   | 2007             | 1996/1997                   | 39                    | 24-32 weeks' GA                               | DCC: 60-90 sec, below placenta, syntocinon                                               | ICC: <20 sec       | Cerebral oxygenation at 4, 24 and 72 hrs of age                             |
| Taiwan [72] (Shen)             | n/a              | 2015/2019                   | 100                   | <30 weeks' GA                                 | UCM: milked once after ICC, 20cm section at speed of 10cm/sec and clamped at 2-3cm.      | ICC and no milking | Neonate's haemoglobin, haematocrit, and mean arterial pressure at admission |
| Thailand [73] (Chamnanvanakij) | 2017             | 2015/2016                   | 46                    | 25-34 weeks' GA                               | UCM: x3-4, 30 cm, before clamping                                                        | DCC: at 60 sec     | Haematocrit level 2 hrs after birth                                         |
| Thailand [74] (Jomjak)         | n/a              | 2018/2018                   | 110                   | Singleton, 24-36 <sup>6</sup> weeks' GA       | DCC                                                                                      | ICC                | Haematocrit at 2 and 48 hrs                                                 |
| Thailand [75] (Mungkornkaew)   | 2015             | 2014/2014                   | 200 (not all preterm) | Singleton, 34-42 weeks' GA*, vaginal delivery | DCC: 2 minutes                                                                           | DCC: 1 minute      | Fetal haematocrit                                                           |
| Thailand [76] (Panichkul)      | n/a              | 2015/2016                   | 70                    | 34-36 weeks' GA                               | DCC: at 60 sec                                                                           | ICC: at 10 sec     | Haematocrit 2 hours after birth                                             |
| Thailand [77] (Prachukthum)    | n/a              | 2016/2018                   | 120                   | 28-33 <sup>6</sup> weeks' GA                  | Arm 1: UCM x3 before cord clamping at 45 sec<br>Arm 2: DCC at 45 sec, followed by UCM x3 | DCC: 45 sec        | RBC transfusion received                                                    |
| Thailand [78] (Ruangkit)       | 2019             | 2016/2017                   | 47                    | Multiples, 28-36 weeks' GA                    | DCC: at 30-60 sec                                                                        | ICC: <10 sec       | Haematocrit level at birth                                                  |
| Thailand [79] (Salae)          | 2016             | 2014/2015                   | 86                    | 34-36 <sup>6</sup> weeks' GA                  | DCC: at 2 minutes                                                                        | ICC: within 30 sec | Haematocrit at 48 hours                                                     |



| Trial Country (PI)        | Publication year | Start year/ completion year | Sample size | Participants                          | Intervention                                                                                         | Comparator         | Primary outcome/s                                                                                |
|---------------------------|------------------|-----------------------------|-------------|---------------------------------------|------------------------------------------------------------------------------------------------------|--------------------|--------------------------------------------------------------------------------------------------|
| Thailand [80] (Tanthawat) | n/a              | 2016/2016                   | 40          | <32 weeks' GA                         | UCM: Cut cord at 30cm, cord milking x1 at 10cm/sec, clamp and cut cord at 1-2cm from umbilical stump | ICC: <10 sec       | Haemoglobin and haematocrit level at admission                                                   |
| Turkey [81] (Alan)        | 2014             | 2011/2013                   | 44          | ≤32 weeks' GA<br>≤1500 g              | UCM: at 25-30 cm x3 at 5cm/s before clamping                                                         | ICC: <10 sec       | Number and volume of packed RBC transfusions received by infant during first 35 days of life     |
| Turkey [82] (Gokmen)      | 2011             | 2008/2009                   | 42          | 24-31 <sup>6</sup> weeks' GA          | DCC: 30-45 sec                                                                                       | ICC: 5-10 sec      | peripheral blood hematopoietic progenitor cells before any blood product administered to infants |
| Turkey [83] (Kilicdag)    | 2015             | 2012/2013                   | 54          | ≤32 weeks' GA                         | UCM: x4 before clamping (20cm/2sec)                                                                  | ICC                | absolute neutrophil counts                                                                       |
| Turkey [84] (Silahli)     | 2018             | 2015/2016                   | 75          | ≤32 weeks' GA                         | UCM: at 20 cm x3, before clamping                                                                    | ICC: <10 sec       | Thymic size                                                                                      |
| UK [85] (Aladangady)      | 2006             | n/a                         | 46          | 24-32 <sup>6</sup> weeks' GA          | DCC: 30-90 sec, below placenta, oxytocic agent, with ventilation/ resuscitation if necessary         | ICC                | Infants' blood volume                                                                            |
| UK [86] (Duley)           | 2018             | 2013/2015                   | 261         | <32 weeks' GA                         | DCC: after at least 2 min                                                                            | ICC: <20 sec       | Death before hospital discharge, intraventricular haemorrhage                                    |
| UK (Holland)              | Not published    | 1998/2001                   | ?           | <33 weeks' gestation                  | DCC: 40-90 s                                                                                         | ICC (?)            | Median arterial/alveolar PO2 ratio over the first 24 hrs of life                                 |
| UK [87] (Kinmond)         | 1993             | n/a                         | 36          | >27 & <32 weeks' GA, vaginal delivery | DCC: 30 sec, 20 cm below placenta                                                                    | ICC: 10 sec median | Initial packed cell volume, peak serum bilirubin concentrations, red                             |

| Trial Country (PI)         | Publication year | Start year/ completion year | Sample size           | Participants                                                                               | Intervention                                                                                        | Comparator                                            | Primary outcome/s                                                                               |
|----------------------------|------------------|-----------------------------|-----------------------|--------------------------------------------------------------------------------------------|-----------------------------------------------------------------------------------------------------|-------------------------------------------------------|-------------------------------------------------------------------------------------------------|
|                            |                  |                             |                       |                                                                                            |                                                                                                     |                                                       | cell transfusions, respiratory impairment                                                       |
| England [88] (Medina)      | 2013             | n/a                         | 51                    | 24-31 weeks' GA                                                                            | DCC                                                                                                 | ICC                                                   | Haemodynamic parameters, included vena cava blood flow, ventricular outflow, and flow velocity. |
| UK [89] (Rabe)             | 2011             | 2006/2008                   | 58                    | Singleton, <34 weeks' GA                                                                   | UCM: x4                                                                                             | DCC: at 30 sec                                        | neonatal blood haematocrit and haemoglobin at 1 hr after birth                                  |
| USA [90] (Backes)          | 2016             | 2009/2013                   | 40                    | Singletons, 22 <sup>5</sup> -27 <sup>6</sup> weeks' GA                                     | DCC: 30-45 sec, below placenta                                                                      | ICC: <10 sec                                          | Safety, feasibility, haematological and circulatory outcomes                                    |
| USA [91] (Bauer)           | n/a              | 2014/2019                   | 300                   | >24 and <30 weeks' GA                                                                      | Arm 1: DCC at 45 sec and indomethacin within 6 hrs<br>Arm 2: DCC at 45 sec and placebo within 6 hrs | Arm 3: ICC and indomethacin<br>Arm 4: ICC and placebo | Fraction of survivors with no severe IVH (grades 3 or 4) or PVL within first 60 days of life    |
| USA [92] (Berens)          | n/a              | 2018/2019                   | 100 (not all preterm) | ≥35 weeks GA*, at least 1 previous child that received phototherapy for hyperbilirubinemia | DCC: 60 sec                                                                                         | ICC: <15 sec                                          | Neonatal bilirubin level 24 hours after birth                                                   |
| USA [93] (Bienstock)       | n/a              | 2011/2013                   | 22                    | 24 <sup>0</sup> -32 <sup>6</sup> weeks' GA                                                 | UCM: x4 over 10 min                                                                                 | ICC                                                   | Haemoglobin within 24 hours of birth and through NICU stay                                      |
| USA [94] (March/deVeciana) | 2013             | 2009/2011                   | 113                   | Singletons, 24-28 <sup>6</sup> weeks' GA                                                   | UCM: 10cm, immediately after delivery, ~20cm actively milked x 3                                    | ICC                                                   | RBC transfusion within 28 days of life                                                          |
| USA [95] (Driggers)        | n/a              | 2011/2013                   | 2                     | Infants delivered at 24 <sup>0</sup> to 28 <sup>6</sup> weeks' GA                          | Arm 1: DCC at 30 sec<br>Arm 2: UCM x4 in 10 sec                                                     | Arm 3: ICC                                            | Adverse neonatal event: composite of BPD, NEC,                                                  |

| Trial Country (PI)        | Publication year | Start year/ completion year | Sample size            | Participants                                   | Intervention                                                                          | Comparator                                                    | Primary outcome/s                                                                                                          |
|---------------------------|------------------|-----------------------------|------------------------|------------------------------------------------|---------------------------------------------------------------------------------------|---------------------------------------------------------------|----------------------------------------------------------------------------------------------------------------------------|
|                           |                  |                             |                        |                                                |                                                                                       |                                                               | grade 3 or 4 IVH or PVL, or death prior to discharge                                                                       |
| USA [96] (Elimian)        | 2014             | 2008/2011                   | 200                    | Singletons, 24-34 weeks' GA                    | DCC: at 30-35 sec (3-4 passes of milking toward the neonate was allowed)              | ICC: <5 sec                                                   | Need for blood transfusion                                                                                                 |
| USA [97] (Ibrahim)        | 2000             | n/a                         | 32                     | Birthweight 501g-1250g, 24 to <29 weeks' GA    | DCC: 20 sec                                                                           | ICC                                                           | Number of blood transfusions                                                                                               |
| USA [98] (Josephsen)      | n/a              | 2012/2016                   | 80                     | 24-27 <sup>6</sup> weeks' GA                   | UCM: below level of placenta and ~20 cm cord milked x3 over 10-20 sec before clamping | ICC                                                           | Haemoglobin and haematocrit concentrations (within 4 hrs birth)<br>Incidence and number blood transfusions until discharge |
| USA [99] (Katheria 2011)  | 2014 & 2017      | 2011/2013                   | 60                     | <32 weeks' GA                                  | UCM: x3, below placenta, about 20cm of cord over 2 sec                                | ICC                                                           | Superior vena cava flow at 6 hours                                                                                         |
| USA [100] (Katheria 2013) | 2015 & 2017      | 2013/2018                   | 197                    | 23-31 <sup>6</sup> weeks' GA                   | UCM: x4 at 20 cm/2 sec                                                                | DCC: at 45-60 sec                                             | Superior vena cava flow at <12 hrs                                                                                         |
| USA [101] (Katheria 2016) | 2016             | 2014/2015                   | 150                    | <32 weeks' GA                                  | CPAP + DCC at 60s                                                                     | DCC: 60s                                                      | Peak haematocrit in first 24 hours of life                                                                                 |
| USA [102] (Katheria 2017) | n/a              | 2017/2022                   | 1200                   | 23-32 <sup>6</sup> weeks' GA                   | UCM: x4 at 20cm/2 sec                                                                 | DCC: at least 60 sec                                          | Incidence of IVH or death at discharge, up to 6 months corrected gestational age                                           |
| USA [103] (Katheria 2019) | n/a              | 2019/2020                   | 1000 (not all preterm) | Non-vigorous newborns born at 35-42 weeks' GA* | UCM: x4, entire umbilical length over 2 sec.                                          | ICC: within 30 sec                                            | Admission to NICU in the first 48 hrs of life                                                                              |
| USA [104] (Kattwinkel)    | n/a              | 2016/2021                   | 940                    | 23 <sup>0</sup> -28 <sup>6</sup> weeks' GA     | DCC: Assisted ventilation (face mask, CPAP or PPV) prior to DCC at 120 sec            | DCC: 30-60 sec, assisted ventilation only after cord clamping | IVH (7-10 days)                                                                                                            |

| Trial Country (PI)       | Publication year   | Start year/ completion year | Sample size | Participants                               | Intervention                                                                                          | Comparator                        | Primary outcome/s                                             |
|--------------------------|--------------------|-----------------------------|-------------|--------------------------------------------|-------------------------------------------------------------------------------------------------------|-----------------------------------|---------------------------------------------------------------|
| USA [105] (Krueger)      | 2015               | 2012/2013                   | 67          | Singletons, 22-31 <sup>6</sup> weeks' GA   | DCC & UCM: cord milking x4 with 4-5 sec between each, then DCC at 30 sec                              | DCC: 30 sec, without cord milking | Initial fetal haematocrit                                     |
| USA [106] (Martin)       | n/a                | 2012/2014                   | 72          | Singletons, 23-37 weeks' GA                | Arm 1: DCC at 60 sec<br>Arm 2: DCC at 40 sec                                                          | DCC: 20 sec                       | IVH number and severity (15 months)                           |
| USA [107] (Mercer 2003)  | 2003               | 1998/2001                   | 32          | Singletons, 24-31 <sup>6</sup> weeks' GA   | DCC: 30-45 sec                                                                                        | ICC: 5-10 sec                     | Initial mean blood pressure on arrival in NICU                |
| USA [108] (Mercer 2006)  | 2006               | 2003/2004                   | 72          | Singletons, <32 weeks' GA                  | DCC: 30-45 sec                                                                                        | ICC: 5-10 sec                     | BPD, suspected NEC                                            |
| USA [109] (Mercer 2008)  | 2011 & 2016 & 2018 | 2008/2014                   | 211         | Singletons, 24-31 <sup>6</sup> weeks' GA   | DCC & UCM: milking x1 then DCC at 30-45 sec. If clamping cannot be deferred, cord milked x2-3 quickly | ICC: <10 sec                      | IVH, late onset sepsis                                        |
| USA [110] (Oh)           | 2011               | 2000/2001                   | 33          | Singletons, 24-27 <sup>6</sup> weeks' GA   | DCC: at 30-45 sec                                                                                     | ICC: <10 sec                      | venous haematocrit at 4 hours of age                          |
| USA [111] (Perlman)      | n/a                | 2015/2019                   | 150         | 28-34 <sup>6</sup> weeks' GA               | DCC: at 60 sec                                                                                        | DCC: at 30 sec                    | Haematocrit 1 hour after birth                                |
| USA [112] (Smith)        | n/a                | 2014/2018                   | 282         | 23 <sup>0</sup> -34 <sup>6</sup> weeks' GA | UCM: x4, before clamping                                                                              | DCC: at 30 sec                    | Haemoglobin & haematocrit in NICU from admission to discharge |
| USA [113] (Strauss)      | 2008               | n/a                         | 158[101]    | ≤36 weeks' GA                              | DCC: 60 sec                                                                                           | ICC                               | RBC volume/mass, per biotin labelling                         |
| USA [114] (Yared/Young)  | n/a                | 2015/2016                   | 39          | Very low birth weight (500 to 1500 grams)* | DCC: at 60 sec                                                                                        | DCC: at 30 sec                    | IVH (during NICU admission up to 6 months)                    |
| Thailand [115] (Pongmee) | 2010 (abstract)    |                             | 43          | <35 weeks' GA                              | UCM: x2 along 30 cm after cutting                                                                     | ICC                               | Initial haematocrit, need for blood transfusion               |

\* only those born <37 weeks gestation eligible

\*\* PI advised individual participant data not available due to time elapsed since trial

PI = Principal Investigator

cm = centimetres

sec = seconds

min = minutes

|                                            |                                        |                                          |                                   |
|--------------------------------------------|----------------------------------------|------------------------------------------|-----------------------------------|
| NICU = neonatal intensive care unit        | GA = gestational age                   | PMA = postmenstrual age                  | ICC = immediate cord clamping     |
| DCC = deferred cord clamping               | UCM = umbilical cord milking           | PBCC = physiological based cord clamping | RBC = red blood cell              |
| CPAP = continuous positive airway pressure | PO2 = partial pressure of oxygen       | PPV = positive pressure ventilation      | NIRS = near-infrared spectroscopy |
| PVL = periventricular leukomalacia         | ROP = retinopathy of prematurity       | BPD = bronchopulmonary dysplasia         | EEG = electroencephalogram        |
| IVH = intraventricular haemorrhage         | PVH = periventricular haemorrhage      | HIE = hypoxic ischemic encephalopathy    |                                   |
| NEC = necrotising enterocolitis            | IUGR = intrauterine growth retardation | PCV = polycythaemia                      |                                   |

1. ISRCTN registry website: **Early compared to delayed umbilical cord clamping in very small prematurely born babies: A study to know which one is better for infant health.** <http://www.isrctn.com/ISRCTN12219110>. Accessed August 27, 2018.
2. ANZCTR registry website: **Resuscitating newborn infants with the umbilical cord intact- The Baby-Directed Umbilical Cord Cutting (Baby-DUCC) Trial.** <http://www.anzctr.org.au/ACTRN12618000621213.aspx>. Accessed 20th February, 2019.
3. McDonnell M, Henderson-Smart D: **Delayed umbilical cord clamping in preterm infants: a feasibility study.** *Journal of paediatrics and child health* 1997, **33**(4):308-310.
4. ANZCTR website: **CORD CLAMPING STUDY: Early versus delayed cord clamping and its effects on infant heart rate and oxygen saturation in the first minutes after birth.** <https://www.anzctr.org.au/Trial/Registration/TrialReview.aspx?id=365659>. Access 20th February, 2019.
5. Australian New Zealand Clinical Trials Registry: **Australian Placental Transfusion Pilot Study: investigating standard cord clamping procedures versus three methods of autologous placental blood transfusion in pre term infants.** <https://www.anzctr.org.au/Trial/Registration/TrialReview.aspx?ACTRN=12609000248268>. Accessed February 20, 2019.
6. Tarnow-Mordi W, Morris J, Kirby A, Robledo K, Askie L, Brown R, Evans N, Finlayson S, Fogarty M, Gebski V *et al*: **Delayed versus Immediate Cord Clamping in Preterm Infants.** *New England Journal of Medicine* 2017, **377**(25):2445-2455.
7. ClinicalTrials.gov registry: **C-UCM and Cerebral Oxygenation and Perfusion.** Available at <https://clinicaltrials.gov/ct2/show/NCT03748914>. Accessed February 20, 2019.
8. Yasmeen S, Shahidullah M, Mannan M, Dey A, Chowdhury R, Haque A, Hassan MZ: **Iron Status in Early versus Delayed Cord Clamping Groups of Preterm Neonates Delivered in a Tertiary Level Hospital.** *Journal of Armed Forces Medical College, Bangladesh* 2015, **10**(2):62-65.
9. Chu K, Whittle W, Windrim R, Shah P, Murphy K: **The DUC trial: A pilot randomized controlled trial of immediate vs. delayed umbilical cord clamping in preterm infants born between 24 and 32 weeks gestation.** *American Journal of Obstetrics and Gynecology* 2011, **204**(1 Suppl):S201.
10. El-Naggar W, Simpson D, Hussain A, Armson A, Dodds L, Warren A, Whyte R, McMillan D: **Cord milking versus immediate clamping in preterm infants: a randomised controlled trial.** *Archives of Disease in Childhood - Fetal and Neonatal Edition* 2019, **104**(2):F145-F150.
11. Saigal S, O'Neill A, Surainder Y, Chua LB, Usher R: **Placental transfusion and hyperbilirubinemia in the premature.** *Pediatrics* 1972, **49**(3):406-419.
12. Dai S, Jin X, Qi HJ: **Effect of different cord clamping times on the prognosis of newborns (不同断脐时间对新生儿预后的影响).** *Modern Pract Med* 2014, **26**:69-71.
13. Dong XY, Sun XF, Li MM, Yu ZB, Han SP: **Influence of delayed cord clamping on preterm infants with a gestational age of <32 weeks [in Chinese].** *Zhongguo Dang Dai Er Ke Za Zhi* 2016, **18**:635-638.

14. Chinese Clinical Trial Registry website: **Effect of delayed cord clamping versus umbilical cord milking on cerebral blood flow in preterm infant: a randomized, double-blind controlled trial.** <http://www.chictr.org.cn/showprojen.aspx?proj=30981>. Accessed February 20, 2019.
15. Hu X, Xu X: **The Effects of Different Cord Clamping Time in Preterm Infants by Vaginal Delivery [Master's Degree Thesis]** Zhejiang University; 2015.
16. Clinical Trials website: **Immediate VS Delayed Cord Clamping on Newborns.** <https://clinicaltrials.gov/ct2/show/NCT01029496> last accessed August 30, 2018.
17. Li J, Yu B, Wang W, Luo D, Dai Q-l, Gan X-q: **Does intact umbilical cord milking increase infection rates in preterm infants with premature prolonged rupture of membranes?** *The Journal of Maternal-Fetal & Neonatal Medicine* 2018:1-7.
18. Chinese Clinical Trial Registry website: **Delayed cord clamping prevents respiratory distress of infants delivered by selective cesarean section, a randomized controlled trial.** <http://www.chictr.org.cn/showprojen.aspx?proj=30199>. Accessed February 20, 2019.
19. Shi W, Peng J, Chen N: **Effect of delayed cord clamping on outcome of delivery.** *Henan Journal of Preventive Medicine* 2017, **28**:85-87.
20. Clinical Trials website: **The Study on Umbilical Cord Milking to Prevent and Decrease the Severity of Anemia in Preterms.** <https://clinicaltrials.gov/ct2/show/NCT03023917> last accessed August 31, 2018.
21. Australian New Zealand Clinical Trials Registry: **Delayed fetal cord clamping in preterm labour, Risk and benefits.** <https://www.anzctr.org.au/Trial/Registration/TrialReview.aspx?id=374731>. Accessed February 21, 2019.
22. ClinicalTrials.gov registry: **Impact of Umbilical Cord Milking in Preterm Neonates With Placental Insufficiency.** <https://clinicaltrials.gov/ct2/show/NCT03731611> Accessed February 21, 2019.
23. ClinicalTrials.gov registry: **Effect of Delayed Cord Clamping in Preterm Neonates With Placental Insufficiency, available at** <https://clinicaltrials.gov/ct2/show/NCT03731546>. Last accessed Feb 21, 2019.
24. Nelle M, Fisher S, Conze S, Beedgen B, Linderkamp O: **Effects of late cord clamping on circulation in prematures (VLBWI).** *Pediatric Research* 1998, **44**(3):454.
25. Rabe H, Wacker A, Hülskamp G, Hörnig-Franz I, Schulze-Everding A, Harms E, Cirkel U, Louwen F, Witteler R, Schneider HP: **A randomised controlled trial of delayed cord clamping in very low birth weight preterm infants.** *Eur J Pediatr* 2000, **159**(10):775-777.
26. ClinicalTrials.gov registry: **Umbilical Cord Milking in Neonates Who Are Depressed at Birth (MIDAB).** Available at <https://clinicaltrials.gov/ct2/show/NCT03657394>. Last accessed February 21, 2019.
27. Clinical Trials Registry India website: **Comparison of advantages and disadvantages of early and delayed umbilical cord clamping in low birth weight newborns.** [http://ctri.nic.in/Clinicaltrials/pdf\\_generate.php?trialid=16653&EncHid=&modid=&compid=%27,%2716653det%27](http://ctri.nic.in/Clinicaltrials/pdf_generate.php?trialid=16653&EncHid=&modid=&compid=%27,%2716653det%27) last accessed February 21, 2019.
28. Clinical Trials Registry India website: **The effects of umbilical cord squeezing in newborn babies requiring some form of intervention to help and support breathing at birth.** [http://www.ctri.nic.in/Clinicaltrials/pdf\\_generate.php?trialid=18641&EncHid=&modid=&compid=%27,%2718641det%27](http://www.ctri.nic.in/Clinicaltrials/pdf_generate.php?trialid=18641&EncHid=&modid=&compid=%27,%2718641det%27), last accessed February 21, 2019.
29. Chopra A, Thakur A, Garg P, Kler N, Gujral K: **Early versus delayed cord clamping in small for gestational age infants and iron stores at 3 months of age-a randomized controlled trial.** *BMC pediatrics* 2018, **18**(1):234.

- 1  
2  
3 30. Das B, Sundaram V, Tarnow-Mordi W, Ghadge A, Dhaliwal LK, Kumar P: **Placental transfusion in preterm neonates of 30–33 weeks' gestation: a randomized controlled trial.** *Journal of Perinatology* 2018, **38**:496–504.
- 4  
5 31. Datta V, Kumar A, Yadav R: **A randomized controlled trial to evaluate the role of brief delay in cord clamping in preterm neonates (34-36 weeks) on short-term neurobehavioural outcome.** *Journal of Tropical Pediatrics* 2017, **63**(6):418–424.
- 6  
7 32. Dhaliwal LK, Anjumunnisa S, Kumar P, Saha PK, Venkataseshan S: **Effects of placental transfusion in preterm birth.** *J Matern Fetal Neonatal Med* 2014, **27**(S1):369-370.
- 8  
9 33. Dipak NK, Nanavat RN, Kabra NK, Srinivasan A, Ananthan A: **Effect of Delayed Cord Clamping on Hematocrit, and Thermal and Hemodynamic Stability in Preterm Neonates: A Randomized Controlled Trial.** *Indian Pediatr* 2017, **54**(2):112-115.
- 10  
11 34. Clinical Trials Registry India website: **Effect of umbilical cord milking of late preterm and term infants on maternal and neonatal outcomes in a tertiary care hospital in South India: A randomized control trial.** <http://www.ctri.nic.in/Clinicaltrials/pmaindet2.php?trialid=19631> last accessed February 21, 2019.
- 12  
13 35. Clinical Trials Registry India website: **Early versus Delayed Cord clamping in IUGR Preterms a Randomised controlled study.** <http://ctri.nic.in/Clinicaltrials/showallp.php?mid1=25064&Enchid=&userName=015204> last accessed February 21, 2019.
- 14  
15 36. Kumar B, Upadhyay A, Gothwal S, Jaiswal V, Joshi P, Dubey K: **Umbilical Cord Milking and Hematological Parameters in Moderate to Late Preterm Neonates: A Randomized Controlled Trial.** *Indian Pediatr* 2015, **52**(9):753-757.
- 16  
17 37. Clinical Trials Registry India website: **Umbilical cord milking in preterm neonates requiring resuscitation: A randomized controlled trial** <http://www.ctri.nic.in/Clinicaltrials/pmaindet2.php?trialid=10609> last accessed August 31, 2018.
- 18  
19 38. Rana A, Agarwal K, Ramji S, Gandhi G, Sahu L: **Safety of delayed umbilical cord clamping in preterm neonates of less than 34 weeks of gestation: a randomized controlled trial.** *Obstetrics & Gynecology Science* 2018, **61**(6):655-661.
- 20  
21 39. Ranjit T, Nesargi S, Rao PNS, Sahoo JP, Ashok C, Chandrakala BS, Bhat S: **Effect of Early versus Delayed Cord Clamping on Hematological Status of Preterm Infants at 6 wk of Age.** *The Indian Journal of Pediatrics* 2015, **82**(1):29-34.
- 22  
23 40. Clinical Trials Registry India website: **Comparison of Umbilical cord milking with Delayed cord clamping in late preterm and term neonates: Randomized control trial.** [www.ctri.nic.in/Clinicaltrials/pmaindet2.php?trialid=14204](http://www.ctri.nic.in/Clinicaltrials/pmaindet2.php?trialid=14204). Accessed August 31, 2018.
- 24  
25 41. Clinical Trials Registry India website: **Effect of cord milking on hemodynamic status and morbidities in neonates more than 35 weeks of gestation.** <http://www.ctri.nic.in/Clinicaltrials/pmaindet2.php?trialid=3182> last accessed August 31, 2018.
- 26  
27 42. ClinicalTrials.gov registry: **Effect of Intact Umbilical Cord Milking on Neonatal and First Year Neurodevelopmental Outcomes in Very Preterm Infants. (Cord Milking).** <https://clinicaltrials.gov/ct2/show/NCT03200301> last accessed February 22, 2019.
- 28  
29 43. Armanian AM, Ghasemi Tehrani H, Ansari M, Ghaemi S: **Is "Delayed Umbilical Cord Clamping" Beneficial for Premature Newborns?** *Int J Pediatr* 2017, **5**(5):4909-4918.
- 30  
31 44. Kazemi MV, Akbarianrad Z, Zahedpasha Y, Mehraein R, Mojaveri MH: **Effects of Delayed Cord Clamping on Intraventricular Hemorrhage in Preterm Infants.** *Iran J Pediatr* 2017 **27**(5):e6570.
- 32  
33 45. Iranian Registry of Clinical Trials website: **Investigation and comparison of neonatal complications of two methods of umbilical cord milking and early cord clamping in neonates.** <http://enirct.ir/trial/29424> last accessed February 22, 2019.
- 34  
35  
36  
37  
38  
39  
40  
41  
42

- 1  
2  
3 46. Sekhavat L, Tabatabaie A: **Immediate and delayed cord clamping in infants born between 26 and 34 weeks.** *Journal of Maternal-Fetal and Neonatal Medicine* 2008, **21**((Suppl 1)):181–182.
- 4  
5 47. Iranian Registry of Clinical Trials website: **The delayed umbilical cord clamping effects on early outcome in Preterm neonates.**  
6 <http://enirctir/trial/17924> last accessed February 22, 2019.
- 7 48. ISRCTN registry website: **Clamping the umbilical cord in premature deliveries (CUPID).** <http://www.isrctn.com/ISRCTN92719670> last accessed  
8 August 27, 2018.
- 9 49. Kugelman A, Borenstein-Levin L, Riskin A, Chistyakov I, Ohel G, Gonen R, Bader D: **Immediate versus delayed umbilical cord clamping in premature  
10 neonates born < 35 weeks: a prospective, randomized, controlled study.** *Am J Perinatol* 2007, **24**(5):307-315.
- 11 50. Pratesi S, Montano S, Ghirardello S, Mosca F, Boni L, Tofani L, Dani C: **Placental circulation intact trial (PCI-T)-resuscitation with the placental  
12 circulation intact versus cord milking for very preterm infants: a feasibility study.** *Frontiers in pediatrics* 2018, **6**:364.
- 13 51. Hosono S, Mugishima H, Fujita H, Hosono A, Minato M, Okada T, Takahashi S, Harada K: **Umbilical cord milking reduces the need for red cell  
14 transfusions and improves neonatal adaptation in infants born at less than 29 weeks' gestation: a randomised controlled trial.** *Arch Dis Child  
15 Fetal Neonatal Ed* 2008, **93**(1):F14-19.
- 16 52. UMIN clinical trials registry: **A multicenter randomized control study of the effect of umbilical cord milking.** [https://upload.umin.ac.jp/cgi-open-  
17 bin/ctr\\_e/ctr\\_view.cgi?recptno=R000001193](https://upload.umin.ac.jp/cgi-open-bin/ctr_e/ctr_view.cgi?recptno=R000001193) last accessed 31 August, 2018.
- 18 53. Song SY, Kim Y, Kang BH, Yoo HJ, Lee M: **Safety of umbilical cord milking in very preterm neonates: a randomized controlled study.** *Obstet Gynecol  
19 Sci* 2017, **60**(6):527-534.
- 20 54. Zisovska E, Lazarevska L, Spasova L, Zivkovic J: **The effect of delayed cord clamping on the need for blood transfusion: P17.** *Transfusion  
21 Alternatives in Transfusion Medicine* 2008, **10**.
- 22 55. Clinical Trials website: **Effect of Timing of Umbilical Cord Clamping on Anaemia at 8 and 12 Months and Later Neurodevelopment.**  
23 <https://clinicaltrials.gov/ct2/show/NCT02222805> last accessed August 27, 2018.
- 24 56. ISRCTN registry website: **Effect of timing of cord clamping in newborns during first 10 minutes of birth.** <http://www.isrctn.com/ISRCTN10944304>  
25 last accessed August 27, 2018.
- 26 57. Knol R, Brouwer E, Klumper F, Van den Akker T, DeKoninck P, Hutten J, Lopriore E, Van Kaam A, Polglase GR, Reiss I: **Effectiveness of Stabilization of  
27 Preterm Infants With Intact Umbilical Cord Using a Purpose-Built Resuscitation Table-Study Protocol for a Randomized Controlled Trial.** *Frontiers  
28 in pediatrics* 2019, **7**:134.
- 29 58. ClinicalTrials.gov registry: **Aeration, Breathing, Clamping Study 3 (ABC3).** <https://clinicaltrials.gov/ct2/show/NCT03808051> last accessed February  
30 22, 2019.
- 31 59. Ultee CA, van der Deure J, Swart J, Lasham C, van Baar AL: **Delayed cord clamping in preterm infants delivered at 34 36 weeks' gestation: a  
32 randomised controlled trial.** *Arch Dis Child Fetal Neonatal Ed* 2008, **93**(1):F20-23.
- 33 60. Australian New Zealand Clinical Trials Registry: **Provision of breathing support during delayed cord clamping in preterm infants.**  
34 <https://www.anzctr.org.au/Trial/Registration/TrialReview.aspx?id=369228>, last accessed November 06, 2019.
- 35 61. Malik AU, Shahnawaz K, Riaz A: **Comparison between the Efficacy of Early and Delayed Umbilical Cord Clamping in Preterm Infants.** *Pak J Med  
36 Health Sci* 2013, **7**(4):992-995.
- 37  
38  
39  
40  
41  
42  
43  
44  
45  
46



- 1  
2  
3  
4  
5  
6  
7  
8  
9  
10  
11  
12  
13  
14  
15  
16  
17  
18  
19  
20  
21  
22  
23  
24  
25  
26  
27  
28  
29  
30  
31  
32  
33  
34  
35  
36  
37  
38  
39  
40  
41  
42  
43  
44  
45  
46
62. ClinicalTrials.gov registry: **Deferred Cord Clamping Compared to Umbilical Cord Milking in Preterm Infants.**  
<https://clinicaltrials.gov/ct2/show/NCT02996799> last accessed February 22, 2019.
63. ClinicalTrials.gov registry: **The Hematologic Impact of Umbilical Cord Milking Versus Deferred Cord Clamping in Premature Neonates.**  
<https://clinicaltrials.gov/ct2/show/NCT03147846> last accessed February 22, 2019.
64. Hofmeyr GJ, Bolton KD, Bowen DC, Govan JJ: **Periventricular/intraventricular haemorrhage and umbilical cord clamping. Findings and hypothesis.** *S Afr Med J* 1988, **73**(2):104-106.
65. Hofmeyr GJ, Gobetz L, Bex PJM, Van Der Griendt M, Nikodem C, Skapinker R, Delahunt T: **Periventricular/intraventricular hemorrhage following early and delayed umbilical cord clamping. A randomized controlled trial.** *Online J Curr Clin Trials* 1993(110).
66. Tiemersma S, Heistein J, Ruijine R, Lopez G, van Lobenstein J, van Rheenen P: **Delayed cord clamping in South African neonates with expected low birthweight: a randomised controlled trial.** *Tropical Medicine & International Health* 2015, **20**(2):177-183.
67. ISRCTN registry website: **DElayed COrd CLAmPing versus early cord clamping in preterm infants born between 24 and 34 weeks.**  
<http://www.isrctn.com/ISRCTN66018314> last accessed August 27, 2018.
68. Clinical Trials website: **Umbilical Cord Milking vs Delayed Cord Clamping in Preterm Infants Born by Cesarean Section.**  
<https://clinicaltrials.gov/ct2/show/NCT02187510> last accessed August 30, 2018.
69. Lago Leal V, Pamplona Bueno L, Cabanillas Vilaplana L, Nicolas Montero E, Martin Blanco M, Fernandez Romero C, El Bakkali S, Pradillo Aramendi T, Sobrino Lorenzano L, Castellano Esparza P *et al*: **Effect of Milking Maneuver in Preterm Infants: A Randomized Controlled Trial.** *Fetal diagnosis and therapy* 2019, **45**(1):57-61.
70. Clinical Trials website: **Timing of Umbilical Cord Occlusion in Premature Babies( <33 w). Delayed vs Early. (CODE-P).**  
<https://clinicaltrials.gov/ct2/show/NCT02187874> last accessed August 27, 2018.
71. Baenziger O, Stolkin F, Keel M, von Siebenthal K, Fauchere JC, Das Kundu S, Dietz V, Bucher HU, Wolf M: **The influence of the timing of cord clamping on postnatal cerebral oxygenation in preterm neonates: a randomized, controlled trial.** *Pediatrics* 2007, **119**(3):455-459.
72. ISRCTN registry website: **Can squeezing blood from the umbilical cord into the baby reduce death and illness in premature babies?**  
<http://www.isrctn.com/ISRCTN17228884> last accessed February 26, 2019.
73. Thai Clinical Trials Registry website: **Effect of delayed cord clamping versus cord milking in infants born at < 34 weeks gestation: a randomized controlled trial.** <http://www.clinicaltrials.in.th/index.php?tp=regtrials&menu=trialssearch&smenu=fulltext&task=search&task2=view1&id=1277> last accessed August 31, 2018.
74. Thai Clinical Trials Registry website: **Delayed cord clamping reduced anemic outcome in preterm neonate,**  
<http://www.clinicaltrials.in.th/index.php?tp=regtrials&menu=trialssearch&smenu=fulltext&task=search&task2=view1&id=3833> last accessed Feb 25, 2019.
75. Mungkornkaew S, Siwadune T: **The Difference of Hematocrit in Term and Preterm Vaginal Births in Different Timing of Delayed Cord Clamping.** *Thai Journal of Obstetrics and Gynaecology* 2015:223-230.
76. Thai Clinical Trials Registry website: **Effects of delayed versus early cord clamping in late preterm infants: a randomized controlled trial.**  
<http://www.clinicaltrials.in.th/index.php?tp=regtrials&menu=trialssearch&smenu=fulltext&task=search&task2=view1&id=1279> last accessed August 29, 2018.

- 1  
2  
3 77. Thai Clinical Trials Registry website: **Comparison of Three Types of Placental transfusion in Preterm Infants: A Randomized Controlled Trial.**  
4 <http://www.clinicaltrialsinth/index.php?tp=regtrials&menu=trialesearch&smenu=fulltext&task=search&task2=view1&id=4427> last accessed  
5 November 06, 2019.
- 6 78. Thai Clinical Trials Registry website: **A Randomized Controlled Trial of Immediate versus Delayed Umbilical Cord Clamping in Preterm Infants of  
7 Multiple Births.** <http://www.clinicaltrialsinth/index.php?tp=regtrials&menu=trialesearch&smenu=fulltext&task=search&task2=view1&id=2189> last  
8 accessed August 29, 2018.
- 9 79. Salae R, Tanprasertkul C, Somprasit C, Bhamarapratana K, Suwannarurk K: **Efficacy of delayed versus immediate cord clamping in late preterm  
10 newborns following normal labor: a randomized control trial.** *J Med Assoc Thai* 2016, **99**(4):S159-S165.
- 11 80. Thai Clinical Trials Registry website: **The Effect of One-Time Umbilical Cord Milking and Early Cord Clamping in Preterm Infants: A Randomized  
12 Controlled Trial (One-Time Umbilical Cord Milking).**  
13 <http://clinicaltrialsinth/index.php?tp=regtrials&menu=trialesearch&smenu=fulltext&task=search&task2=view1&id=2347> last accessed August 31,  
14 2018.
- 15 81. Alan S, Arsan S, Okulu E, Akin IM, Kilic A, Taskin S, Cetinkaya E, Erdeve O, Atasay B: **Effects of Umbilical Cord Milking on the Need for Packed Red  
16 Blood Cell Transfusions and Early Neonatal Hemodynamic Adaptation in Preterm Infants Born  $\leq 1500$  g: A Prospective, Randomized, Controlled  
17 Trial.** *Journal of Pediatric Hematology/Oncology* 2014, **36**(8):e493-e498.
- 18 82. Gokmen Z, Ozkiraz S, Tarcan A, Kozanoglu I, Ozcimen Emel E, Ozbek N: **Effects of delayed umbilical cord clamping on peripheral blood  
19 hematopoietic stem cells in premature neonates.** *Journal of Perinatal Medicine* 2011, **39**:323-329.
- 20 83. Kilicdag H, Gulcan H, Hanta D, Torer B, Gokmen Z, Ozdemir SI, Antmen BA: **Is umbilical cord milking always an advantage?** *The Journal of Maternal-  
21 Fetal & Neonatal Medicine* 2016, **29**(4):615-618.
- 22 84. Silahli M, Duman E, Gokmen Z, Toprak E, Gokdemir M, Ecevit A: **The relationship between placental transfusion, and thymic size and neonatal  
23 morbidities in premature infants - A Randomized Control Trial.** *JPMA The Journal of the Pakistan Medical Association* 2018, **68**(11):1560-1565.
- 24 85. Aladangady N, McHugh S, Aitchison TC, Wardrop CA, Holland BM: **Infants' blood volume in a controlled trial of placental transfusion at preterm  
25 delivery.** *Pediatrics* 2006, **117**(1):93-98.
- 26 86. Duley L, Dorling J, Pushpa-Rajah A, Oddie SJ, Yoxall CW, Schoonakker B, Bradshaw L, Mitchell EJ, Fawke JA: **Randomised trial of cord clamping and  
27 initial stabilisation at very preterm birth.** *Archives of Disease in Childhood - Fetal and Neonatal Edition* 2018, **103**(1):F6-F14.
- 28 87. Kinmond S, Aitchison TC, Holland BM, Jones JG, Turner TL, Wardrop CA: **Umbilical cord clamping and preterm infants: a randomised trial.** *BMJ  
29 (Clinical research ed)* 1993, **306**(6871):172-175.
- 30 88. Medina IMF: **Late clamping of the umbilical cord in premature neonates: The real haemodynamic benefits.** *Enfermeria Clinica* 2014, **24**(5):305-  
31 308.
- 32 89. Rabe H, Jewison A, Alvarez RF, Crook D, Stilton D, Bradley R, Holden D: **Milking compared with delayed cord clamping to increase placental  
33 transfusion in preterm neonates: a randomized controlled trial.** *Obstetrics & Gynecology* 2011, **117**(2):205-211.
- 34 90. Backes CH, Huang H, Iams JD, Bauer JA, Giannone PJ: **Timing of umbilical cord clamping among infants born at 22 through 27 weeks' gestation.** *J  
35 Perinatol* 2016, **36**(1):35-40.
- 36  
37  
38  
39  
40  
41  
42

- 1  
2  
3 91. Clinical Trials website: **Effects of Delayed Cord Clamp and/or Indomethacin on Preterm Infant Brain Injury.**  
4 <https://clinicaltrials.gov/ct2/show/NCT02221219> last accessed August 27, 2018.
- 5 92. ClinicalTrials.gov registry: **Relationship Between Delayed Cord Clamping at Birth and Neonatal Bilirubin Levels in Parturients With a Prior Child**  
6 **Requiring Therapy for Neonatal Jaundice,** <https://clinicaltrials.gov/ct2/show/NCT03741803> last accessed February 25th, 2019.
- 7 93. Clinical Trials website: **Milking the Umbilical Cord Versus Immediate Clamping in Pre-term Infants < 33 Weeks.**  
8 <https://clinicaltrials.gov/ct2/show/NCT01819532> last accessed August 30, 2018.
- 9 94. March MI, Hacker MR, Parson AW, Modest AM, de Veciana M: **The effects of umbilical cord milking in extremely preterm infants: A randomized**  
10 **controlled trial.** *J Perinatol* 2013, **33**(10):763-767.
- 11 95. ClinicalTrials.gov registry: **Delayed Umbilical Cord Clamping Versus Cord Milking in Preterm Neonate,**  
12 <https://clinicaltrials.gov/ct2/show/NCT01393834> last accessed 25th February, 2019.
- 13 96. Clinical Trials website: **A Randomized Controlled Trial of Immediate Versus Delayed Cord Clamping in the Preterm Neonate.**  
14 <https://clinicaltrials.gov/ct2/show/NCT00579839> last accessed August 27, 2018.
- 15 97. Ibrahim HM, Krouskop RW, Lewis DF, Dhanireddy R: **Placental transfusion: umbilical cord clamping and preterm infants.** *Journal of Perinatology*  
16 2000, **20**(6):351.
- 17 98. Josephsen J, Vlastos E, Potter S, Al-Hosni M: **Milking the umbilical cord in extreme preterm infants.** *Am J Obstet Gynecol* 2014, **10**(1 Suppl):S403-  
18 404.
- 19 99. Katheria AC, Leone TA, Woelkers D, Garey DM, Rich W, Finer NN: **The effects of umbilical cord milking on hemodynamics and neonatal outcomes**  
20 **in premature neonates.** *J Pediatrics* 2014, **164**(5):1045-1050.
- 21 100. Katheria AC, Truong G, Cousins L, Oshiro B, Finer NN: **Umbilical cord milking versus delayed cord clamping in preterm infants.** *Pediatrics* 2015,  
22 **136**(1):61-69.
- 23 101. Katheria A, Poeltler D, Durham J, Steen J, Rich W, Arnell K, Maldonado M, Cousins L, Finer N: **Neonatal Resuscitation with an Intact Cord: A**  
24 **Randomized Clinical Trial.** *Journal of Pediatrics* 2016, **178**:75-80.e73.
- 25 102. ClinicalTrials.gov registry: **Premature Infants Receiving Milking or Delayed Cord Clamping: PREMOD2.** Available at  
26 <https://clinicaltrials.gov/ct2/show/NCT03019367>. Accessed August 23, 2019.
- 27 103. ClinicalTrials.gov registry: **Umbilical Cord Milking in Non-Vigorous Infants (MINVI).** Available at <https://clinicaltrials.gov/ct2/show/NCT03631940>.  
28 **Accessed August 23, 2019.**
- 29 104. Clinical Trials website: **VentFirst: A Multicenter RCT of Assisted Ventilation During Delayed Cord Clamping for Extremely Preterm Infants.**  
30 <https://clinicaltrials.gov/ct2/show/NCT02742454> last accessed August 27, 2018.
- 31 105. Krueger MS, Eyal FG, Peevy KJ, Hamm CR, Whitehurst RM, Lewis DF: **Delayed cord clamping with and without cord stripping: A prospective**  
32 **randomized trial of preterm neonates.** *Am J Obstet Gynecol* 2015, **212**(3):394.e391-395.
- 33 106. Clinical Trials website: **Optimal Timing of Cord Clamping in Preterm Pregnancy Following Vaginal or Cesarean Delivery (CordClamp).**  
34 <https://clinicaltrials.gov/ct2/show/NCT01766908> last accessed August 27, 2018.
- 35 107. Mercer JS, McGrath MM, Hensman A, Silver H, Oh W: **Immediate and delayed cord clamping in infants born between 24 and 32 weeks: a pilot**  
36 **randomized controlled trial.** *Journal of perinatology* 2003, **23**(6):466.
- 37  
38  
39  
40  
41  
42  
43  
44  
45  
46

- 1  
2  
3 108. Mercer JS, Vohr BR, McGrath MM, Padbury JF, Wallach M, Oh W: **Delayed cord clamping in very preterm infants reduces the incidence of intraventricular hemorrhage and late-onset sepsis: a randomized, controlled trial.** *Pediatrics* 2006, **117**(4):1235-1242.
- 4  
5 109. Mercer JS, Erickson-Owens DA, Vohr BR, Tucker RJ, Parker AB, Oh W, Padbury JF: **Effects of placental transfusion on neonatal and 18 month outcomes in preterm infants: a randomized controlled trial.** *J Pediatrics* 2016, **168**:50-55.
- 6  
7 110. Oh W, Fanaroff AA, Carlo WA, Donovan EF, McDonald SA, Poole WK, Eunice Kennedy Shriver National Institute of Child Health and Human Development Neonatal Research Network: **Effects of delayed cord clamping in very-low-birth-weight infants.** *J Perinatol* 2011, **31**:S68-S71.
- 8  
9 111. Clinical Trials website: **Delayed Cord Clamping in Preterm Neonates (DCC).** <https://clinicaltrials.gov/ct2/show/NCT02478684> last accessed August 29, 2018.
- 10  
11 112. Clinical Trials website: **Delayed Clamping and Milking the Umbilical Cord in Preterm Infants.** <https://clinicaltrials.gov/ct2/show/NCT02092103> last accessed August 31, 2018.
- 12  
13 113. Strauss RG, Mock DM, Johnson KJ, Cress GA, Burmeister LF, Zimmerman MB, Bell EF, Rijhsinghani A: **A randomized clinical trial comparing immediate versus delayed clamping of the umbilical cord in preterm infants: short-term clinical and laboratory endpoints.** *Transfusion* 2008, **48**(4):658-665.
- 14  
15 114. ClinicalTrials.gov registry: **Delayed Cord Clamping in Very Low Birth Weight Infants (DCC).** Available at <https://clinicaltrials.gov/ct2/show/NCT02337088>. Accessed August 23, 2019.
- 16  
17 115. Pongmee P, Nuntnarumit P: **Effects of umbilical cord milking on initial hematocrit and the need for blood transfusion in preterm infants.** In: **Pediatric Academic Societies Annual Meeting; 2010 May 1-4; Vancouver, Canada. 2010.**
- 18  
19  
20  
21  
22  
23  
24  
25  
26  
27  
28  
29  
30  
31  
32  
33  
34  
35  
36  
37  
38  
39  
40  
41  
42

## Supplementary File 2: PRISMA-P checklist

| Section and topic    | Item no. | Checklist item                                                                                                                                                                                                                | Page number          |
|----------------------|----------|-------------------------------------------------------------------------------------------------------------------------------------------------------------------------------------------------------------------------------|----------------------|
| Title                | 1a       | Identify the report as a protocol of a systematic review                                                                                                                                                                      | p.1                  |
|                      | 1b       | If protocol is for an update of a previous review, identify as such                                                                                                                                                           | Not applicable       |
| Registration         | 2        | If registered, provide the name of the registry and registration number.                                                                                                                                                      | p.2                  |
| Authors              | 3a       | Provide name, institutional affiliation, email address of all protocol authors, provide physical mailing address of corresponding author.                                                                                     | p.1                  |
|                      | 3b       | Describe contributions of protocol authors and identity the guarantor of the review.                                                                                                                                          | p.16                 |
| Amendments           | 4        | If the protocol represents an amendment of a previously completed or published protocol, identify as such and list changes; otherwise, state plan for documenting important protocol amendments.                              | p.11, p.12           |
| Support              | 5a       | Indicate sources of financial or other support for the review.                                                                                                                                                                | p.16                 |
|                      | 5b       | Provide name for review funder and/or sponsor.                                                                                                                                                                                | p.16                 |
|                      | 5c       | Describe roles of funder(s), sponsor(s), and/or institution(s), if any, in developing the protocol.                                                                                                                           | p.16                 |
| Rationale            | 6        | Describe the rationale for the review in the context of what is already known.                                                                                                                                                | p.4-5                |
| Objectives           | 7        | Provide an explicit statement of the question(s) the review will address with reference to participants, interventions, comparators and outcomes (PICO)                                                                       | p.6                  |
| Eligibility criteria | 8        | Specify the study characteristics (such as PICO, study design, setting time frame) and report characteristics (such as years considered, language, publication status) to be used as criteria for eligibility for the review. | p.6-8                |
| Information sources  | 9        | Describe all intended information sources (such as electronic databases, contact with study authors, trial registers or other grey literature sources) with planned dates of coverage.                                        | p.8-9                |
| Search strategy      | 10       | Present draft of search strategy to be used for at least one electronic database, including planned limits, such that it could be repeated.                                                                                   | Supplementary File 3 |

|    |                                    |     |                                                                                                                                                                                                                                                   |            |
|----|------------------------------------|-----|---------------------------------------------------------------------------------------------------------------------------------------------------------------------------------------------------------------------------------------------------|------------|
| 1  | Study records                      | 11a | Describe the mechanism(s) that will be used to manage records and data throughout the review.                                                                                                                                                     | p.8 ff.    |
| 2  |                                    | 11b | State the process that will be used for selecting studies (such as two independent reviewers) through each phase of the review (that is, screening, eligibility and inclusion in meta-analysis).                                                  | p.8        |
| 3  |                                    |     |                                                                                                                                                                                                                                                   |            |
| 4  |                                    |     |                                                                                                                                                                                                                                                   |            |
| 5  |                                    |     |                                                                                                                                                                                                                                                   |            |
| 6  |                                    |     |                                                                                                                                                                                                                                                   |            |
| 7  |                                    |     |                                                                                                                                                                                                                                                   |            |
| 8  |                                    | 11c | Describe planned method of extracting data from reports (such as piloting forms, done independently, in duplicate), any processes for obtaining and confirming data from investigators.                                                           | p.8 ff.    |
| 9  |                                    |     |                                                                                                                                                                                                                                                   |            |
| 10 |                                    |     |                                                                                                                                                                                                                                                   |            |
| 11 |                                    |     |                                                                                                                                                                                                                                                   |            |
| 12 | Data items                         | 12  | List and define all variables for which data will be sought (such as PICO items, funding sources), and pre-planned data assumptions and simplifications.                                                                                          | p.9 ff.    |
| 13 |                                    |     |                                                                                                                                                                                                                                                   |            |
| 14 |                                    |     |                                                                                                                                                                                                                                                   |            |
| 15 | Outcomes and prioritization        | 13  | List and define all outcomes for which data will be sought, including prioritization of main and additional outcomes, with rationale.                                                                                                             | p.9 ff.    |
| 16 |                                    |     |                                                                                                                                                                                                                                                   |            |
| 17 |                                    |     |                                                                                                                                                                                                                                                   |            |
| 18 | Risk of bias in individual studies | 14  | Describe anticipated methods for assessing risk of bias of individual studies, including whether this will be done at the outcome or study level, or both; state how this information will be used in data synthesis.                             | p.9        |
| 19 |                                    |     |                                                                                                                                                                                                                                                   |            |
| 20 |                                    |     |                                                                                                                                                                                                                                                   |            |
| 21 |                                    |     |                                                                                                                                                                                                                                                   |            |
| 22 |                                    |     |                                                                                                                                                                                                                                                   |            |
| 23 | Data synthesis                     | 15a | Describe criteria under which study data will be quantitatively synthesised.                                                                                                                                                                      | p.12, p.13 |
| 24 |                                    |     |                                                                                                                                                                                                                                                   |            |
| 25 |                                    | 15b | If data are appropriate for quantitative synthesis, describe planned summary measures, methods of handling data and methods of combining data from studies, including any planned exploration of consistency (such as $I^2$ , Kendall's $\tau$ ). | p.12, p.13 |
| 26 |                                    |     |                                                                                                                                                                                                                                                   |            |
| 27 |                                    |     |                                                                                                                                                                                                                                                   |            |
| 28 |                                    |     |                                                                                                                                                                                                                                                   |            |
| 29 |                                    |     |                                                                                                                                                                                                                                                   |            |
| 30 |                                    |     |                                                                                                                                                                                                                                                   |            |
| 31 |                                    | 15c | Describe any proposed additional analyses (such as sensitivity or subgroup analyses, meta-regression).                                                                                                                                            | p.14       |
| 32 |                                    |     |                                                                                                                                                                                                                                                   |            |
| 33 |                                    |     |                                                                                                                                                                                                                                                   |            |
| 34 |                                    | 15d | If quantitative synthesis is not appropriate, describe the type of summary planned.                                                                                                                                                               | n.a.       |
| 35 |                                    |     |                                                                                                                                                                                                                                                   |            |
| 36 | Meta-bias(es)                      | 16  | Specify any planned assessment of meta-bias(es) (such as publication bias across studies, selective reporting within studies).                                                                                                                    | p.14       |
| 37 |                                    |     |                                                                                                                                                                                                                                                   |            |
| 38 |                                    |     |                                                                                                                                                                                                                                                   |            |
| 39 | Confidence in cumulative evidence  | 17  | Describe how the strength of the body of evidence will be assessed (such as GRADE).                                                                                                                                                               | p.9        |
| 40 |                                    |     |                                                                                                                                                                                                                                                   |            |
| 41 |                                    |     |                                                                                                                                                                                                                                                   |            |
| 42 |                                    |     |                                                                                                                                                                                                                                                   |            |
| 43 |                                    |     |                                                                                                                                                                                                                                                   |            |
| 44 |                                    |     |                                                                                                                                                                                                                                                   |            |
| 45 |                                    |     |                                                                                                                                                                                                                                                   |            |
| 46 |                                    |     |                                                                                                                                                                                                                                                   |            |

## iCOMP search strategy

1. We used search results from a prospective meta-analysis we had previously planned to conduct on cord clamping in preterm infants. Regular searches were conducted from 2010 to 2017.
2. We used search results up to November 2018 from a recently updated Cochrane review on cord clamping in preterm infants, on which some of us are authors (Rabe H, Gyte GML, Díaz-Rossello JL, Duley L. Effect of timing of umbilical cord clamping and other strategies to influence placental transfusion at preterm birth on maternal and infant outcomes. Cochrane Database of Systematic Reviews 2019, Issue 9. Art. No.: CD003248. DOI: 10.1002/14651858.CD003248.pub4.)
3. We conducted new independent searches for the period from November 2018 onwards.

Details of all searches are elucidated below.

### 1. Search methods – for previously planned PMA (up to September 2017)

We regularly searched the World Health Organisation (WHO) International Clinical Trials Registry Platform (ICTRP) from the period January 2010 to September 2017. In total, fourteen searches were conducted over this period, using a combination of the search terms shown below.

#### 1.1 ICTRP

1. placental transfusion
2. cord clamp\*
3. umbilical cord clamp\*
4. cord milking
5. milking
6. umbilical cord
7. preterm
8. pre-term
9. prematur\*

### 2. Search methods - Cochrane review update (8<sup>th</sup> November 2018)

The following sources were searched: Cochrane Pregnancy and Childbirth's Trials Register, ClinicalTrials.gov and WHO ICTRP. Further details of each are provided below.

#### 2.1 Pregnancy and Childbirth's Trials Register

- Searched 8 November 2018 by the Cochrane Pregnancy and Childbirth Information Specialist.
- For detailed information about the registry and search strategies, please go to <https://pregnancy.cochrane.org/pregnancy-and-childbirth-groups-trials-register>.

#### 2.2 ICTRP

cord AND clamp  
 cord and clamping  
 cord AND milking  
 cord AND stripping

#### 2.3 ClinicalTrials.gov

Advanced search

Interventional studies | cord clamping  
 Interventional studies | cord milking  
 Interventional studies | cord stripping

### 3. Search methods (13<sup>th</sup> February 2019)

We searched Ovid MEDLINE, Embase, EBM Reviews - Cochrane Central Register of Controlled Trials, WHO ICTRP and ClinicalTrials.gov using the search strings below.

#### 3.1 Ovid MEDLINE(R)

1. umbilical-cord.mp. or exp umbilical cord/
2. (Clamp\$ OR Milk\$).af.
3. (Placenta\$ adj2 transfus\$).af
4. 2 or 3
5. exp Infant, Premature/ or preterm\*.mp.
6. prematur\*.mp.
7. exp Infant, Low Birth Weight/ or exp Infant, Very Low Birth Weight
8. exp Infant, Extremely Low Birth Weight
9. 5 or 6 or 7 or 8
10. 1 and 4 and 9
11. limit 10 to (humans and clinical trial, all)
12. limit 11 to ed=20181001-20190213

#### 3.2 Embase

1. umbilical-cord.mp. or exp umbilical cord/
2. (Clamp\$ OR Milk\$).af.
3. (Placenta\$ adj2 transfus\$).af
4. 2 or 3
5. exp Infant, Premature/ or preterm\*.mp.
6. prematur\*.mp.
7. exp Infant, Low Birth Weight/ or exp Infant, Very Low Birth Weight
8. exp Infant, Extremely Low Birth Weight
9. 5 or 6 or 7 or 8
10. 1 and 4 and 9
11. limit 10 to (human and randomized controlled trial)
12. limit 11 to yr="2018 -Current"

#### 3.3 EBM Reviews - Cochrane Central Register of Controlled Trials

1. umbilical-cord.mp. or exp umbilical cord/
2. (Clamp\$ OR Milk\$).af.
3. (Placenta\$ adj2 transfus\$).af
4. 2 or 3
5. exp Infant, Premature/ or preterm\*.mp.
6. prematur\*.mp.
7. exp Infant, Low Birth Weight/ or exp Infant, Very Low Birth Weight
8. exp Infant, Extremely Low Birth Weight
9. 5 or 6 or 7 or 8
10. 1 and 4 and 9
11. limit 10 to yr="2018 -Current"



## 3.4 WHO ICTRP

| Search string   |                                                                                                                                                                          |
|-----------------|--------------------------------------------------------------------------------------------------------------------------------------------------------------------------|
| Basic search    |                                                                                                                                                                          |
| 1.              | placental transfusion<br>(limit date of registration from 1/11/2018 onwards)                                                                                             |
| 2.              | cord clamp<br>(limit date of registration from 1/11/2018 onwards)                                                                                                        |
| 3.              | cord clamping<br>(limit date of registration from 1/11/2018 onwards)                                                                                                     |
| 4.              | milking<br>(limit date of registration from 1/11/2018 onwards)                                                                                                           |
| Advanced search |                                                                                                                                                                          |
| 5.              | <u>Title:</u> umbilical cord<br><u>Condition:</u> preterm OR premature<br><u>Recruitment Status:</u> All<br>(limit date of registration from 1/11/2018 onwards)          |
| 6.              | <u>Condition:</u> preterm OR premature<br><u>Intervention:</u> "umbilical cord"<br><u>Recruitment Status:</u> All<br>(limit date of registration from 1/11/2018 onwards) |

## 3.5 Clinicaltrials.gov

| Search string |                                                                                                                                                      |
|---------------|------------------------------------------------------------------------------------------------------------------------------------------------------|
| Basic search  |                                                                                                                                                      |
| 1.            | <u>Other terms:</u> "placental transfusion"<br><u>First posted</u> from 11/01/2018 to 02/13/2019 (MM/DD/YYYY)                                        |
| 2.            | <u>Other terms:</u> "cord clamp"<br><u>First posted</u> from 11/01/2018 to 02/13/2019 (MM/DD/YYYY)                                                   |
| 3.            | <u>Other terms:</u> "cord clamping"<br><u>First posted</u> from 11/01/2018 to 02/13/2019 (MM/DD/YYYY)                                                |
| 4.            | <u>Other terms:</u> milking<br><u>First posted</u> from 11/01/2018 to 02/13/2019 (MM/DD/YYYY)                                                        |
| 5.            | <u>Condition or disease:</u> Preterm Birth<br><u>Other terms:</u> "umbilical cord"<br><u>First posted</u> from 11/01/2018 to 02/13/2019 (MM/DD/YYYY) |
