# Supplementary material for: Systematic review and network meta-analysis with individual participant data on cord management at preterm birth (iCOMP): study protocol
Source: BMJ Open. 2020 Mar 29;10(3):e034595. doi: 10.1136/bmjopen-2019-034595 (PMC7170588; doi:10.1136/bmjopen-2019-034595)
Supplement: Supplementary data [file bmjopen-2019-034595supp001.pdf]

## iCOMP Trial Master List January 2020

This table shows all trials that we have identified as being eligible for inclusion in iCOMP. All trials that are part of the iCOMP collaboration have been marked in blue.

**Table:** Eligible randomised trials to date for the pairwise & network meta-analysis with individual participant data on Cord Management at Preterm Birth (iCOMP)

| Trial Country (PI)                   | Publication year                     | Start year/ completion year | Sample size           | Participants                                      | Intervention                                                                                                                                                                                | Comparator                      | Primary outcome/s                                 |
|--------------------------------------|--------------------------------------|-----------------------------|-----------------------|---------------------------------------------------|---------------------------------------------------------------------------------------------------------------------------------------------------------------------------------------------|---------------------------------|---------------------------------------------------|
| Argentina [1]<br>(Carroli)           | n/a                                  | 2016/2020                   | 700                   | Singletons, 24-30 <sup>6</sup> weeks' GA          | DCC: at 90 sec                                                                                                                                                                              | DCC: ~30 sec                    | Sepsis (proven and very probable)                 |
| Australia [2]<br>(Badurdeen)         | n/a                                  | 2018/2020                   | 120 (not all preterm) | ≥32 weeks' GA*, require resuscitation at delivery | DCC: resuscitation prior to cord clamping (for PPV, clamping delayed until at least 60 sec after colour change of pedicap/neostat; for CPAP, clamping occurs at least 2 min after delivery) | ICC (followed by resuscitation) | Average heart rate between 60-120 sec after birth |
| Australia [3]<br>(McDonnell)         | 1997                                 | 1994/1994                   | 46                    | 26 to 33 weeks' GA                                | DCC: 30 sec                                                                                                                                                                                 | ICC                             | Venous haematocrit                                |
| Australia [4]<br>(Kamlin)            | n/a                                  | 2014/2015                   | 27 (not all preterm)  | 32-42 weeks' GA*                                  | Arm 1: DCC at 90-180 sec<br>Arm 2: DCC 10 sec after crying and breathing established                                                                                                        | DCC: <60 sec                    | Heart rate 90 sec after birth                     |
| Australia [5]<br>(Tarnow-Mordi 2009) | n/a<br>(Pilot for Tarnow-Mordi 2017) | 2009/2010                   | 100                   | <32 weeks' GA                                     | Arm 1: Cord milking during resuscitation - cord cut long (3cm from placenta/introitus)<br>Arm 2: DCC at 30-60 sec. If baby in extremis, immediate clamping.                                 | ICC: within 10 sec              | Haemoglobin 6 hours after birth                   |

## iCOMP

| Trial Country (PI)                | Publication year | Start year/ completion year | Sample size          | Participants                                                                                                            | Intervention                                                                   | Comparator                               | Primary outcome/s                                                                                                                                                                                                                  |
|-----------------------------------|------------------|-----------------------------|----------------------|-------------------------------------------------------------------------------------------------------------------------|--------------------------------------------------------------------------------|------------------------------------------|------------------------------------------------------------------------------------------------------------------------------------------------------------------------------------------------------------------------------------|
|                                   |                  |                             |                      |                                                                                                                         | Arm 3: DCC at 30-60 sec + milking                                              |                                          |                                                                                                                                                                                                                                    |
| Australia [6] (Tarnow-Mordi 2017) | 2017             | 2010/2017                   | 1634                 | <30 weeks' GA                                                                                                           | DCC: ≥60 sec                                                                   | ICC within 10 sec                        | Composite: Death or major morbidity (severe brain injury, severe ROP, NEC, or late onset sepsis) at 36 weeks' PMA                                                                                                                  |
| Austria [7] (Urlesberger)         | n/a              | 2018/2021                   | 80 (not all preterm) | ≥28 weeks' GA*, caesarean                                                                                               | DCC: <30 sec, cord milking after long clamping at 30cm, 1x 10cm/sec            | Standard care (cord cutting, no milking) | Changes in cerebral blood volume within 15 min after birth                                                                                                                                                                         |
| Bangladesh [8] (Yasmeen)          | 2014             | 2012/2013                   | 40                   | <37 weeks' GA                                                                                                           | DCC: 3 minutes                                                                 | DCC: 1 minute                            | Haemoglobin, iron and ferritin                                                                                                                                                                                                     |
| Canada [9] (Chu/Murphy)           | n/a              | 2007/2010                   | 296                  | Singletons, 24-32 weeks' GA                                                                                             | DCC: at 30-45 sec                                                              | ICC                                      | Composite: IVH or late onset sepsis                                                                                                                                                                                                |
| Canada [10] (El-Naggar)           | 2018             | 2011/2014                   | 73                   | 24-30 <sup>6</sup> weeks' GA                                                                                            | UCM: x3, at or below the level of the placenta, ~20 cm milked, before clamping | ICC                                      | Systemic blood flow (Superior vena cava flow at 4-6 hours after birth)                                                                                                                                                             |
| Canada [11] (Saigal)**            | 1972             | n/a                         | 125 (preterm)        | Premature infants 28-36 weeks GA and weighing 1020g-3250g OR full-term infants 28-42 weeks GA and weighing 2685g-4350g* | Arm 1: DCC at 1min<br>Arm 2: DCC at 5min                                       | ICC                                      | RBC volume, blood volume, haematocrit, plasma volume                                                                                                                                                                               |
| China [12] (Dai)                  | 2014             | n/a                         | 52 (preterm)         | Singletons, term and preterm infants*                                                                                   | DCC: Wait until cord pulsation ceased                                          | ICC: 5-10 sec                            | RBC count (72-96 hrs after birth), Anaemia (2 wks), clinically significant pathological polycythaemia, white blood cell count (72-96 hrs after birth), fetal bilirubin from birth to day 5, jaundice within 24 hrs of birth, Apgar |

## iCOMP

| Trial Country (PI) | Publication year       | Start year/ completion year | Sample size               | Participants                                                                                                      | Intervention                                                                                                                                                                                             | Comparator                                                                                                   | Primary outcome/s                                                                                         |
|--------------------|------------------------|-----------------------------|---------------------------|-------------------------------------------------------------------------------------------------------------------|----------------------------------------------------------------------------------------------------------------------------------------------------------------------------------------------------------|--------------------------------------------------------------------------------------------------------------|-----------------------------------------------------------------------------------------------------------|
|                    |                        |                             |                           |                                                                                                                   |                                                                                                                                                                                                          |                                                                                                              | (1 min, 5 min), respiratory distress, rectal temperature 5 min after birth, neonate well-being at 1 month |
| China [13] (Dong)  | 2016                   | 2015/2015                   | 90                        | Singletons, <32 weeks' GA                                                                                         | DCC: 45 sec                                                                                                                                                                                              | ICC: <10 sec                                                                                                 | Severe IVH – grades 3 and 4                                                                               |
| China [14] (Hao)   | n/a                    | 2018/2019                   | 48                        | 30-31 <sup>6</sup> weeks' GA                                                                                      | UCM                                                                                                                                                                                                      | DCC                                                                                                          | Cerebral haemodynamics 15 min after birth                                                                 |
| China [15] (Hu)    | 2015 (master's thesis) | n/a                         | 120                       | 28-35 weeks' GA, vaginal birth                                                                                    | Arm 1: DCC at 30 sec<br>Arm 2: DCC at 60 sec<br>Arm 3: DCC at 120 sec                                                                                                                                    | ICC < 10 sec                                                                                                 | Haematocrit and haemoglobin levels at 24 hrs and 1 wk after birth                                         |
| China [16] (Hua)   | 2010?                  | 2009/2011                   | 176 (49 of those preterm) | Any GA*                                                                                                           | <u>Normal birth</u><br>Arm 1: DCC – wait until cord ceases pulsing<br>Arm 2: DCC – at 90 sec<br><u>Asphyxia</u><br>Arm 1: DCC – wait until cord ceases pulsing, resuscitate on bed site with cord intact | <u>Normal birth</u><br>ICC <10 sec<br><u>Asphyxia</u><br>ICC <10 sec, resuscitate after on irradiation table | Haemoglobin 1 month after birth                                                                           |
| China [17] (Li)    | 2018                   | 2017/2017                   | 102                       | delivered vaginally between 28 <sup>0</sup> -36 <sup>6</sup> weeks', and premature prolonged rupture of membranes | UCM: x4 at a speed of 10cm/sec, then clamped                                                                                                                                                             | ICC                                                                                                          | Incidence of certain or probable infection in neonates                                                    |
| China [18] (Liu)   | n/a                    | 2019/2019                   | 948 (not all preterm)     | 34 <sup>0</sup> -38 <sup>6</sup> weeks' GA*, caesarean section                                                    | DCC: 60 sec                                                                                                                                                                                              | ICC: within 10 sec                                                                                           | Rate of respiratory distress within 24 hours after birth                                                  |
| China [19] (Shi)   | 2017                   | n/a                         | 60 preterm (and 460 term) | Single foetus deliveries*                                                                                         | DCC                                                                                                                                                                                                      | ICC: 5-10 sec                                                                                                | Hemoglobin (newborn cord blood & after 24 hrs), neonatal complications, bleeding volume, third labour     |

## iCOMP

| Trial Country (PI)       | Publication year | Start year/ completion year | Sample size            | Participants                          | Intervention                                                                                  | Comparator                         | Primary outcome/s                                                                                                                                                                                                   |
|--------------------------|------------------|-----------------------------|------------------------|---------------------------------------|-----------------------------------------------------------------------------------------------|------------------------------------|---------------------------------------------------------------------------------------------------------------------------------------------------------------------------------------------------------------------|
|                          |                  |                             |                        |                                       |                                                                                               |                                    | time, incidence of placental adhesion and peeling                                                                                                                                                                   |
| China [20] (Xie)         | n/a              | 2017/2019                   | 300                    | Singletons, <34 weeks' GA             | UCM: x2-3, 25cm/2 sec, below placenta level, before clamping                                  | ICC                                | Haemoglobin, Haematocrit, and ferritin level at 48 hours                                                                                                                                                            |
| Egypt [21] (Allam)       | n/a              | 2018/2019                   | 210                    | Singletons, 30-34 weeks' GA           | DCC: until cord stops pulsing or 1-2 min                                                      | ICC: <5 sec                        | Fetal haemoglobin, bilirubin, death                                                                                                                                                                                 |
| Egypt [22] (Nour 2017a)  | n/a              | 2017/2019                   | 90                     | <34 weeks' GA                         | UCM: x3 at 10cm/sec, below placenta level, cord held 20-25cm from baby                        | ICC                                | Peripheral venous CD34 at admission                                                                                                                                                                                 |
| Egypt [23] (Nour 2017b)  | n/a              | 2017/2018                   | 90                     | <34 weeks' GA                         | Arm 1: ICC, with placental insufficiency<br>Arm 2: DCC at 60sec, with placental insufficiency | Normal placenta with DCC at 60 sec | Peripheral venous CD34 at admission                                                                                                                                                                                 |
| Germany [24] (Nelle)     | 1998             | n/a                         | 19                     | PT <1500g*, born by caesarean section | DCC: 30 sec, 30 cm below placenta                                                             | ICC                                | Mean Blood Pressure, left ventricular output, mean cerebral blood flow velocity in the arteria carotis interna, haemoglobin, haematocrit, systemic and cerebral haemoglobin transport, systemic vascular resistance |
| Germany [25] (Rabe 2000) | 2000             | 2006/2008                   | 40                     | <33 weeks' GA                         | DCC: 45 sec                                                                                   | DCC: 20 sec                        | Feasibility, effects on post-partal adaption and anaemia of prematurity                                                                                                                                             |
| India [26] (Aghai 2018)  | n/a              | 2018/2020                   | 1400 (not all preterm) | Depressed neonates, 35-42 weeks' GA*  | UCM: x4, 30cm over 2 sec                                                                      | ICC: immediately after birth       | Number of infants with moderate to severe HIE or death                                                                                                                                                              |
| India [27] (Anusha)      | n/a              | 2017/2019                   | 148                    | birth weight <1500g*                  | DCC: 30 sec                                                                                   | ICC: within 10 sec                 | Haemodynamic stability, haematological status, serum ferritin, and requirement of                                                                                                                                   |

## iCOMP

| Trial Country (PI)        | Publication year | Start year/ completion year | Sample size           | Participants                                       | Intervention                                                                                                          | Comparator         | Primary outcome/s                                                              |
|---------------------------|------------------|-----------------------------|-----------------------|----------------------------------------------------|-----------------------------------------------------------------------------------------------------------------------|--------------------|--------------------------------------------------------------------------------|
|                           |                  |                             |                       |                                                    |                                                                                                                       |                    | blood transfusion between birth and 6 months of age                            |
| India [28] (Bhriguvanshi) | n/a              | 2017/2018                   | 236                   | > 28 weeks' GA, requiring resuscitation*           | UCM: x3 towards baby at 10cm/sec, then clamped                                                                        | ICC: within 30 sec | Haemoglobin and haematocrit at birth and 6 weeks of age                        |
| India [29] (Chopra)       | 2018             | 2013/2015                   | 142                   | growth retarded babies (IUGR) ≥ 35 weeks' GA*      | DCC: 60 sec                                                                                                           | ICC: 10 sec        | Haemoglobin and ferritin levels                                                |
| India [30] (Das/Sundaram) | 2018             | 2012/2013                   | 461                   | 30-33 <sup>6</sup> weeks' GA                       | DCC: 60 sec below placenta. If baby depressed, immediate clamping keeping cord long, milked x2-3 during resuscitation | ICC: within 10 sec | Composite of mortality or abnormal neurological examination at 40 weeks PMA    |
| India [31] (Datta)        | 2017             | 2011/2013                   | 120                   | Singletons, 34-36 <sup>6</sup> weeks' GA           | DCC: at >30-<60 sec                                                                                                   | ICC: <20 sec       | Neurobehavioural Assessment of Preterm Infant at 37 weeks' post-conceptual age |
| India [32] (Dhaliwal)     | 2014             | n/a                         | 300                   | 34-37 weeks' GA                                    | DCC: 60 sec                                                                                                           | ICC: <10 sec       | Risk of neonatal mortality & abnormal neurological examination at 40 weeks' GA |
| India [33] (Dipak)        | 2017             | 2012/2013                   | 78                    | 27-31 <sup>6</sup> weeks' GA                       | Arm 1: DCC: 60 sec<br>Arm 2: DCC: 60 sec with intramuscular ergometrine                                               | ICC: <10 sec       | Hematocrit 4 h after birth                                                     |
| India [34] (George/Isac)  | n/a              | 2017/2018                   | 180 (not all preterm) | Mothers at 34-40 <sup>6</sup> weeks' GA*           | UCM: milking whole length at 10cm/sec x3, then clamped                                                                | ICC                | Infant haemoglobin and haematocrit at 72hrs and 6 weeks                        |
| India [35] (Gupta)        | n/a              | 2018/2020                   | 110                   | <34 weeks' GA                                      | DCC: 30 sec                                                                                                           | ICC                | Ferritin and PCV at 8 weeks                                                    |
| India [36] (Kumar)        | 2015             | 2013/2014                   | 200                   | 32-36 <sup>6</sup> weeks' GA, vaginal or caesarean | UCM: x3, 10cm/sec                                                                                                     | ICC                | Haemoglobin and ferritin at 1.5 months                                         |

## iCOMP

| Trial Country (PI)                    | Publication year | Start year/ completion year | Sample size           | Participants                                                                         | Intervention                                                                 | Comparator                  | Primary outcome/s                                                      |
|---------------------------------------|------------------|-----------------------------|-----------------------|--------------------------------------------------------------------------------------|------------------------------------------------------------------------------|-----------------------------|------------------------------------------------------------------------|
| India [37]<br>(Ram Mohan)             | 2018             | 2015/2016                   | 60                    | <37 weeks' GA, requiring resuscitation                                               | UCM: 20-25 cm umbilical cord x3 at 10cm/sec within 30 sec of birth           | No milking                  | Haemoglobin and serum ferritin at 6 weeks                              |
| India [38]<br>(Rana/Agarwal)          | 2018             | 2013/2013                   | 100                   | <34 weeks' GA                                                                        | DCC: 120 sec                                                                 | ICC: ≤30 sec                | serum total bilirubin and haematocrit levels at 48 hrs and 7 days      |
| India [39]<br>(Ranjit)                | 2015             | 2010/2010                   | 100                   | 30-36 <sup>6</sup> weeks' GA                                                         | DCC: >2min                                                                   | ICC                         | Haematocrit and serum ferritin at 6 weeks                              |
| India [40]<br>(Kumar Mangla/ Thukral) | n/a              | 2016/2017                   | 144 (not all preterm) | Late preterm and term neonates*                                                      | Deferred UCM: cord clamped at 60 sec                                         | UCM: Cord milking in 10 sec | Venous haematocrit at 48 hours of life                                 |
| India [41]<br>(Upadhyay 2010)         | 2013             | 2010/2011                   | 170 (not all preterm) | >35 weeks' GA*                                                                       | UCM: x3 at 10cm/sec, then clamped at ~25 cm of length within 30 sec of birth | ICC: <30 sec                | Haemoglobin and serum ferritin at 6 weeks                              |
| India [42]<br>(Varanattu)             | n/a              | 2018/2019                   | 250                   | <32 weeks' GA                                                                        | UCM: x3 over 20 sec at 20cm/2sec with 2 second pause between                 | ICC: clamped immediately    | Haemoglobin levels at birth and IVH (incidence and severity) at 7 days |
| Iran [43]<br>(Armanian)               | 2017             | 2014/2015                   | 63                    | ≤34 weeks' GA                                                                        | DCC: at 30-45 sec                                                            | ICC: at 5-10 sec            | Time of cord clamping                                                  |
| Iran [44]<br>(Mojaveri)               | 2017             | 2014/2015                   | 70                    | <32 weeks' GA, caesarean, birth weight < 1500g, not requiring advanced resuscitation | DCC: at 30-45 sec                                                            | ICC: <10 sec                | IVH (days 3 to 7), survival infant (up to 28 days)                     |
| Iran [45]<br>(Mirzaeian)              | n/a              | 2017/2018                   | 160                   | 28-34 weeks' GA                                                                      | UCM: milked x3 in 10 sec                                                     | ICC                         | Amount of transfused blood, bilirubin levels                           |
| Iran [46]<br>(Sekhavat)               | 2008             | n/a                         | 52                    | 26-34 weeks' GA                                                                      | DCC: 30-60 sec                                                               | ICC: 10-15 sec              | Blood pressure, haematocrit, blood glucose                             |

## iCOMP

| Trial Country (PI)          | Publication year | Start year/ completion year | Sample size | Participants                 | Intervention                                                                                                                                             | Comparator                         | Primary outcome/s                                                                                                                                                                                    |
|-----------------------------|------------------|-----------------------------|-------------|------------------------------|----------------------------------------------------------------------------------------------------------------------------------------------------------|------------------------------------|------------------------------------------------------------------------------------------------------------------------------------------------------------------------------------------------------|
| Iran [47]<br>(Shahgheibi)   | n/a              | 2017/2018                   | 90          | Women with preterm labour    | DCC: 180 sec                                                                                                                                             | DCC: 30 sec                        | blood parameters, weaning from ventilator, NICU discharge time                                                                                                                                       |
| Ireland [48]<br>(Dempsey)   | n/a              | 2015/2016                   | 45          | <32 weeks' GA                | Arm 1: DCC at 60 sec on mobile resuscitation trolley at/below placenta level<br>Arm 2: UCM – Cord stripped 3 times at 20cm/2 sec at/below placenta level | ICC: <20 sec                       | Neonatal: Brain activity (6 & 12 hours post-partum, EEG and NIRS)<br>Maternal: hemoglobin at 24-36 hours post-partum                                                                                 |
| Israel [49]<br>(Kugelman)   | 2007             | 2004/2005                   | 65          | 24-35 <sup>6</sup> weeks' GA | DCC: 30-45 sec, below placenta level                                                                                                                     | ICC: <10 sec                       | Haematocrit, blood pressure                                                                                                                                                                          |
| Italy [50]<br>(Pratesi)     | 2018             | 2016/2017                   | 40          | 23-29 <sup>6</sup> weeks' GA | Bedside assistance with intact placental circulation                                                                                                     | UCM: x4, 10cm/sec, before clamping | Feasibility (recruitment rate, compliance, completeness, receiving echographic assessment) and safety                                                                                                |
| Japan [51]<br>(Hosono 2008) | 2008             | 2001/2002                   | 40          | 24-28 weeks' GA, singletons  | UCM: 20 cm of the cord, x2-3, before clamping, 20cm/2sec                                                                                                 | ICC                                | Probability of not needing transfusion, number of RBC transfusions                                                                                                                                   |
| Japan [52]<br>(Hosono 2016) | 2016             | 2008/2016                   | 203         | 24-27 <sup>6</sup> weeks' GA | UCM: cord cut 30 cm from infant, cord milked x1                                                                                                          | ICC: <30 sec                       | 1) Probability needing transfusion and death<br>2) Amount of blood transfusion first 4 weeks                                                                                                         |
| Korea [53]<br>(Song)        | 2017             | 2012/2015                   | 66          | 24-32 <sup>6</sup> weeks' GA | UCM: x4 at 20cm/2sec, with 2 sec pause between                                                                                                           | ICC: immediately after delivery    | Short term safety: Apgar score, prevalence of hypothermia, early intubation, initial blood gas analyses, bilirubin levels, duration of phototherapy, use of cross-transfusion, respiratory distress. |

## iCOMP

| Trial Country (PI)              | Publication year | Start year/ completion year | Sample size            | Participants                                        | Intervention                                                                                                                                                                                                     | Comparator                                                                           | Primary outcome/s                                                                                                                                                   |
|---------------------------------|------------------|-----------------------------|------------------------|-----------------------------------------------------|------------------------------------------------------------------------------------------------------------------------------------------------------------------------------------------------------------------|--------------------------------------------------------------------------------------|---------------------------------------------------------------------------------------------------------------------------------------------------------------------|
| Macedonia [54] (Zisovska)       | 2008             | n/a                         | 57                     | Premature newborns                                  | DCC: 1 min                                                                                                                                                                                                       | ICC                                                                                  | Hematological parameters, number of RBC transfusions                                                                                                                |
| Nepal [55] (Andersson)          | 2017             | 2014/2017                   | 540 (not all preterm)  | 34-41 weeks' GA*                                    | DCC: at ≤180 sec                                                                                                                                                                                                 | ICC: ≤30 sec                                                                         | Haemoglobin at 8±1 months                                                                                                                                           |
| Nepal [56] (Ashish KC)          | n/a              | 2016/2016                   | 1510 (not all preterm) | Singletons, normal vaginal delivery, ≥33 weeks' GA* | DCC: at 180 sec                                                                                                                                                                                                  | DCC: <60 sec                                                                         | Neonatal heart rate continuously until 10 min after birth and at 1,3&5 min                                                                                          |
| Netherlands [57] (Knol)         | n/a              | 2018/2019                   | 64                     | <32 weeks' GA                                       | Physiology-based cord clamping:stabilisation while the cord is intact, cord clamped when infant is respiratory stable (regular spontaneous breathing, heart rate >100 bpm, oxygen>90%, supplemental oxygen <40%) | ICC/DCC: immediately or delayed 30-60 sec, depending on clinical condition of infant | Time needed to stabilise the infant                                                                                                                                 |
| Netherlands [58] (Te Pas)       | n/a              | 2019/2020                   | 660                    | <30 weeks' GA                                       | Physiology-based cord clamping: Resuscitation with cord intact, clamp when infant is stable (heart rate >100 bpm, oxygen>85%, supplemental oxygen <40%)                                                          | ICC/DCC: immediately or delayed 30-60 sec, depending on clinical condition of infant | Intact survival at NICU discharge without cerebral injury (IVH ≥ grade 2 and/or PVL ≥ grade 2 and/or periventricular venous infarction) and/or NEC (Bell stage ≥ 2) |
| Netherlands [59] (Ultee)        | 2008             | n/a                         | 37                     | 34 to 36 <sup>6</sup> weeks' GA                     | DCC: 3 min                                                                                                                                                                                                       | ICC: <30 sec                                                                         | blood glucose levels at 1,2, and 3hrs of age, haemoglobin and haematocrit at 1hr and 10 weeks, ferritin at 10 weeks                                                 |
| New Zealand [60] (Meyer/Nevill) | n/a              | 2016/2020                   | 120                    | <31 weeks' GA, not breathing regularly at 15sec     | Positive pressure ventilation and continuous positive                                                                                                                                                            | DCC: 50sec with thermal wrap                                                         | RBC transfusion rates                                                                                                                                               |

## iCOMP

| Trial Country (PI)               | Publication year | Start year/ completion year | Sample size           | Participants                    | Intervention                                             | Comparator                                                                              | Primary outcome/s                                                                                                            |
|----------------------------------|------------------|-----------------------------|-----------------------|---------------------------------|----------------------------------------------------------|-----------------------------------------------------------------------------------------|------------------------------------------------------------------------------------------------------------------------------|
|                                  |                  |                             |                       |                                 | airway pressure until cord clamping at 50s               |                                                                                         |                                                                                                                              |
| Pakistan [61] (Malik)            | 2013             | 2009-2009                   | 80                    | 30-37 weeks' GA                 | DCC: 120 sec                                             | DCC: 30 sec                                                                             | Haematocrit                                                                                                                  |
| Saudi Arabia [62] (Al-Wassia)    | n/a              | 2017/2019                   | 180                   | <32 weeks' GA                   | UCM: milked 20cm segment over 2-3 sec x3                 | DCC: 60 sec                                                                             | IVH at 28 days                                                                                                               |
| Saudi Arabia [63] (Gomaa)        | n/a              | 2016/2018                   | 200                   | 24 to 34 <sup>6</sup> weeks' GA | DCC: 45-60 sec, baby at level or below placenta          | UCM: milked x4-5 from maternal end of cord to baby abdomen, 2 sec pause between milking | Haematological parameters - haematocrit                                                                                      |
| South Africa [64] (Hofmeyr 1988) | 1988             | n/a                         | 38                    | Singleton, <35 weeks' GA        | Arm 1: DCC at 60sec<br>Arm 2: DCC at 60sec + ergometrine | ICC                                                                                     | PVH/IVH at 6-72hrs after birth, Apgar score at 5min, birthweight, systolic blood pressure at 5min, cord blood gas and death. |
| South Africa [65] (Hofmeyr 1993) | 1993             | n/a                         | 86                    | <2000 g birthweight*            | DCC: 1-2 min                                             | ICC                                                                                     | death of the baby, PVH/IVH at 6-72hrs after birth, Apgar score at 5min, cord-pH, bilirubin                                   |
| South Africa [66] (Tiemersma)    | 2015             | 2012/2012                   | 104 (not all preterm) | Birth weight <2500g ± 500g*     | DCC: 2-3 minutes                                         | ICC: within 30 sec                                                                      | Haemoglobin from cord blood and at 2 months                                                                                  |
| Spain [67] (De Paco Matallana)   | n/a              | 2011/2014                   | 100                   | 24- 34 weeks' GA                | DCC: 45-60 sec                                           | ICC: <10 sec                                                                            | Neonatal haemoglobin, haematocrit and bilirubin levels (within 7 days after birth)                                           |
| Spain [68] (Domingo Puiggrós)    | n/a              | 2014/2016                   | 40                    | <34 weeks' GA, caesarean        | UCM: x3 at 20 cm/2sec                                    | DCC: 30 sec                                                                             | Haemoglobin at 1 and 24 hrs                                                                                                  |

## iCOMP

| Trial Country (PI)           | Publication year | Start year/ completion year | Sample size           | Participants                                  | Intervention                                                                             | Comparator         | Primary outcome/s                                                           |
|------------------------------|------------------|-----------------------------|-----------------------|-----------------------------------------------|------------------------------------------------------------------------------------------|--------------------|-----------------------------------------------------------------------------|
| Spain [69] (Leal)            | 2019             | 2013/2016                   | 138                   | 24 <sup>0</sup> -36 <sup>6</sup> weeks' GA    | UCM: nearly 20cm cord milked towards umbilicus x4 before clamping                        | ICC: <20 sec       | Requirement of RBC transfusions or phototherapy                             |
| Spain [70] (Socias)          | n/a              | 2014/2017                   | 150                   | 26-32 <sup>6</sup> weeks' GA                  | DCC: 30-60 sec                                                                           | ICC: <30sec        | RBC transfusions (number & volume), IVH, postpartum haemorrhage             |
| Switzerland [71] (Baenziger) | 2007             | 1996/1997                   | 39                    | 24-32 weeks' GA                               | DCC: 60-90 sec, below placenta, syntocinon                                               | ICC: <20 sec       | Cerebral oxygenation at 4, 24 and 72 hrs of age                             |
| Taiwan [72] (Shen)           | n/a              | 2015/2019                   | 100                   | <30 weeks' GA                                 | UCM: milked once after ICC, 20cm section at speed of 10cm/sec and clamped at 2-3cm.      | ICC and no milking | Neonate's haemoglobin, haematocrit, and mean arterial pressure at admission |
| Thailand [73] (Chamnvanakij) | 2017             | 2015/2016                   | 46                    | 25-34 weeks' GA                               | UCM: x3-4, 30 cm, before clamping                                                        | DCC: at 60 sec     | Haematocrit level 2 hrs after birth                                         |
| Thailand [74] (Jomjak)       | n/a              | 2018/2018                   | 110                   | Singleton, 24-36 <sup>6</sup> weeks' GA       | DCC                                                                                      | ICC                | Haematocrit at 2 and 48 hrs                                                 |
| Thailand [75] (Mungkornkaew) | 2015             | 2014/2014                   | 200 (not all preterm) | Singleton, 34-42 weeks' GA*, vaginal delivery | DCC: 2 minutes                                                                           | DCC: 1 minute      | Fetal haematocrit                                                           |
| Thailand [76] (Panichkul)    | n/a              | 2015/2016                   | 70                    | 34-36 weeks' GA                               | DCC: at 60 sec                                                                           | ICC: at 10 sec     | Haematocrit 2 hours after birth                                             |
| Thailand [77] (Prachukthum)  | n/a              | 2016/2018                   | 120                   | 28-33 <sup>6</sup> weeks' GA                  | Arm 1: UCM x3 before cord clamping at 45 sec<br>Arm 2: DCC at 45 sec, followed by UCM x3 | DCC: 45 sec        | RBC transfusion received                                                    |
| Thailand [78] (Ruangkit)     | 2019             | 2016/2017                   | 47                    | Multiples, 28-36 weeks' GA                    | DCC: at 30-60 sec                                                                        | ICC: <10 sec       | Haematocrit level at birth                                                  |
| Thailand [79] (Salae)        | 2016             | 2014/2015                   | 86                    | 34-36 <sup>6</sup> weeks' GA                  | DCC: at 2 minutes                                                                        | ICC: within 30 sec | Haematocrit at 48 hours                                                     |

## iCOMP

| Trial Country (PI)        | Publication year | Start year/ completion year | Sample size | Participants                          | Intervention                                                                                         | Comparator         | Primary outcome/s                                                                                |
|---------------------------|------------------|-----------------------------|-------------|---------------------------------------|------------------------------------------------------------------------------------------------------|--------------------|--------------------------------------------------------------------------------------------------|
| Thailand [80] (Tanthawat) | n/a              | 2016/2016                   | 40          | <32 weeks' GA                         | UCM: Cut cord at 30cm, cord milking x1 at 10cm/sec, clamp and cut cord at 1-2cm from umbilical stump | ICC: <10 sec       | Haemoglobin and haematocrit level at admission                                                   |
| Turkey [81] (Alan)        | 2014             | 2011/2013                   | 44          | ≤32 weeks' GA<br>≤1500 g              | UCM: at 25-30 cm x3 at 5cm/s before clamping                                                         | ICC: <10 sec       | Number and volume of packed RBC transfusions received by infant during first 35 days of life     |
| Turkey [82] (Gokmen)      | 2011             | 2008/2009                   | 42          | 24-31 <sup>6</sup> weeks' GA          | DCC: 30-45 sec                                                                                       | ICC: 5-10 sec      | peripheral blood hematopoietic progenitor cells before any blood product administered to infants |
| Turkey [83] (Kilicdag)    | 2015             | 2012/2013                   | 54          | ≤32 weeks' GA                         | UCM: x4 before clamping (20cm/2sec)                                                                  | ICC                | absolute neutrophil counts                                                                       |
| Turkey [84] (Silahli)     | 2018             | 2015/2016                   | 75          | ≤32 weeks' GA                         | UCM: at 20 cm x3, before clamping                                                                    | ICC: <10 sec       | Thymic size                                                                                      |
| UK [85] (Aladangady)      | 2006             | n/a                         | 46          | 24-32 <sup>6</sup> weeks' GA          | DCC: 30-90 sec, below placenta, oxytocic agent, with ventilation/ resuscitation if necessary         | ICC                | Infants' blood volume                                                                            |
| UK [86] (Duley)           | 2018             | 2013/2015                   | 261         | <32 weeks' GA                         | DCC: after at least 2 min                                                                            | ICC: <20 sec       | Death before hospital discharge, intraventricular haemorrhage                                    |
| UK (Holland)              | Not published    | 1998/2001                   | ?           | <33 weeks' gestation                  | DCC: 40-90 s                                                                                         | ICC (?)            | Median arterial/alveolar PO2 ratio over the first 24 hrs of life                                 |
| UK [87] (Kinmond)         | 1993             | n/a                         | 36          | >27 & <32 weeks' GA, vaginal delivery | DCC: 30 sec, 20 cm below placenta                                                                    | ICC: 10 sec median | Initial packed cell volume, peak serum bilirubin concentrations, red                             |

## iCOMP

| Trial Country (PI)         | Publication year | Start year/ completion year | Sample size           | Participants                                                                               | Intervention                                                                                        | Comparator                                            | Primary outcome/s                                                                               |
|----------------------------|------------------|-----------------------------|-----------------------|--------------------------------------------------------------------------------------------|-----------------------------------------------------------------------------------------------------|-------------------------------------------------------|-------------------------------------------------------------------------------------------------|
|                            |                  |                             |                       |                                                                                            |                                                                                                     |                                                       | cell transfusions, respiratory impairment                                                       |
| England [88] (Medina)      | 2013             | n/a                         | 51                    | 24-31 weeks' GA                                                                            | DCC                                                                                                 | ICC                                                   | Haemodynamic parameters, included vena cava blood flow, ventricular outflow, and flow velocity. |
| UK [89] (Rabe)             | 2011             | 2006/2008                   | 58                    | Singleton, <34 weeks' GA                                                                   | UCM: x4                                                                                             | DCC: at 30 sec                                        | neonatal blood haematocrit and haemoglobin at 1 hr after birth                                  |
| USA [90] (Backes)          | 2016             | 2009/2013                   | 40                    | Singletons, 22 <sup>5</sup> -27 <sup>6</sup> weeks' GA                                     | DCC: 30-45 sec, below placenta                                                                      | ICC: <10 sec                                          | Safety, feasibility, haematological and circulatory outcomes                                    |
| USA [91] (Bauer)           | n/a              | 2014/2019                   | 300                   | >24 and <30 weeks' GA                                                                      | Arm 1: DCC at 45 sec and indomethacin within 6 hrs<br>Arm 2: DCC at 45 sec and placebo within 6 hrs | Arm 3: ICC and indomethacin<br>Arm 4: ICC and placebo | Fraction of survivors with no severe IVH (grades 3 or 4) or PVL within first 60 days of life    |
| USA [92] (Berens)          | n/a              | 2018/2019                   | 100 (not all preterm) | ≥35 weeks GA*, at least 1 previous child that received phototherapy for hyperbilirubinemia | DCC: 60 sec                                                                                         | ICC: <15 sec                                          | Neonatal bilirubin level 24 hours after birth                                                   |
| USA [93] (Bienstock)       | n/a              | 2011/2013                   | 22                    | 24 <sup>0</sup> -32 <sup>6</sup> weeks' GA                                                 | UCM: x4 over 10 min                                                                                 | ICC                                                   | Haemoglobin within 24 hours of birth and through NICU stay                                      |
| USA [94] (March/deVeciana) | 2013             | 2009/2011                   | 113                   | Singletons, 24-28 <sup>6</sup> weeks' GA                                                   | UCM: 10cm, immediately after delivery, ~20cm actively milked x 3                                    | ICC                                                   | RBC transfusion within 28 days of life                                                          |
| USA [95] (Driggers)        | n/a              | 2011/2013                   | 2                     | Infants delivered at 24 <sup>0</sup> to 28 <sup>6</sup> weeks' GA                          | Arm 1: DCC at 30 sec<br>Arm 2: UCM x4 in 10 sec                                                     | Arm 3: ICC                                            | Adverse neonatal event: composite of BPD, NEC,                                                  |

## iCOMP

| Trial Country (PI)        | Publication year | Start year/ completion year | Sample size            | Participants                                   | Intervention                                                                          | Comparator                                                    | Primary outcome/s                                                                                                          |
|---------------------------|------------------|-----------------------------|------------------------|------------------------------------------------|---------------------------------------------------------------------------------------|---------------------------------------------------------------|----------------------------------------------------------------------------------------------------------------------------|
|                           |                  |                             |                        |                                                |                                                                                       |                                                               | grade 3 or 4 IVH or PVL, or death prior to discharge                                                                       |
| USA [96] (Elimian)        | 2014             | 2008/2011                   | 200                    | Singletons, 24-34 weeks' GA                    | DCC: at 30-35 sec (3-4 passes of milking toward the neonate was allowed)              | ICC: <5 sec                                                   | Need for blood transfusion                                                                                                 |
| USA [97] (Ibrahim)        | 2000             | n/a                         | 32                     | Birthweight 501g-1250g, 24 to <29 weeks' GA    | DCC: 20 sec                                                                           | ICC                                                           | Number of blood transfusions                                                                                               |
| USA [98] (Josephsen)      | n/a              | 2012/2016                   | 80                     | 24-27 <sup>6</sup> weeks' GA                   | UCM: below level of placenta and ~20 cm cord milked x3 over 10-20 sec before clamping | ICC                                                           | Haemoglobin and haematocrit concentrations (within 4 hrs birth)<br>Incidence and number blood transfusions until discharge |
| USA [99] (Katheria 2011)  | 2014 & 2017      | 2011/2013                   | 60                     | <32 weeks' GA                                  | UCM: x3, below placenta, about 20cm of cord over 2 sec                                | ICC                                                           | Superior vena cava flow at 6 hours                                                                                         |
| USA [100] (Katheria 2013) | 2015 & 2017      | 2013/2018                   | 197                    | 23-31 <sup>6</sup> weeks' GA                   | UCM: x4 at 20 cm/2 sec                                                                | DCC: at 45-60 sec                                             | Superior vena cava flow at <12 hrs                                                                                         |
| USA [101] (Katheria 2016) | 2016             | 2014/2015                   | 150                    | <32 weeks' GA                                  | CPAP + DCC at 60s                                                                     | DCC: 60s                                                      | Peak haematocrit in first 24 hours of life                                                                                 |
| USA [102] (Katheria 2017) | n/a              | 2017/2022                   | 1200                   | 23-32 <sup>6</sup> weeks' GA                   | UCM: x4 at 20cm/2 sec                                                                 | DCC: at least 60 sec                                          | Incidence of IVH or death at discharge, up to 6 months corrected gestational age                                           |
| USA [103] (Katheria 2019) | n/a              | 2019/2020                   | 1000 (not all preterm) | Non-vigorous newborns born at 35-42 weeks' GA* | UCM: x4, entire umbilical length over 2 sec.                                          | ICC: within 30 sec                                            | Admission to NICU in the first 48 hrs of life                                                                              |
| USA [104] (Kattwinkel)    | n/a              | 2016/2021                   | 940                    | 23 <sup>0</sup> -28 <sup>6</sup> weeks' GA     | DCC: Assisted ventilation (face mask, CPAP or PPV) prior to DCC at 120 sec            | DCC: 30-60 sec, assisted ventilation only after cord clamping | IVH (7-10 days)                                                                                                            |

## iCOMP

| Trial Country (PI)       | Publication year   | Start year/ completion year | Sample size | Participants                               | Intervention                                                                                          | Comparator                        | Primary outcome/s                                             |
|--------------------------|--------------------|-----------------------------|-------------|--------------------------------------------|-------------------------------------------------------------------------------------------------------|-----------------------------------|---------------------------------------------------------------|
| USA [105] (Krueger)      | 2015               | 2012/2013                   | 67          | Singletons, 22-31 <sup>6</sup> weeks' GA   | DCC & UCM: cord milking x4 with 4-5 sec between each, then DCC at 30 sec                              | DCC: 30 sec, without cord milking | Initial fetal haematocrit                                     |
| USA [106] (Martin)       | n/a                | 2012/2014                   | 72          | Singletons, 23-37 weeks' GA                | Arm 1: DCC at 60 sec<br>Arm 2: DCC at 40 sec                                                          | DCC: 20 sec                       | IVH number and severity (15 months)                           |
| USA [107] (Mercer 2003)  | 2003               | 1998/2001                   | 32          | Singletons, 24-31 <sup>6</sup> weeks' GA   | DCC: 30-45 sec                                                                                        | ICC: 5-10 sec                     | Initial mean blood pressure on arrival in NICU                |
| USA [108] (Mercer 2006)  | 2006               | 2003/2004                   | 72          | Singletons, <32 weeks' GA                  | DCC: 30-45 sec                                                                                        | ICC: 5-10 sec                     | BPD, suspected NEC                                            |
| USA [109] (Mercer 2008)  | 2011 & 2016 & 2018 | 2008/2014                   | 211         | Singletons, 24-31 <sup>6</sup> weeks' GA   | DCC & UCM: milking x1 then DCC at 30-45 sec. If clamping cannot be deferred, cord milked x2-3 quickly | ICC: <10 sec                      | IVH, late onset sepsis                                        |
| USA [110] (Oh)           | 2011               | 2000/2001                   | 33          | Singletons, 24-27 <sup>6</sup> weeks' GA   | DCC: at 30-45 sec                                                                                     | ICC: <10 sec                      | venous haematocrit at 4 hours of age                          |
| USA [111] (Perlman)      | n/a                | 2015/2019                   | 150         | 28-34 <sup>6</sup> weeks' GA               | DCC: at 60 sec                                                                                        | DCC: at 30 sec                    | Haematocrit 1 hour after birth                                |
| USA [112] (Smith)        | n/a                | 2014/2018                   | 282         | 23 <sup>0</sup> -34 <sup>6</sup> weeks' GA | UCM: x4, before clamping                                                                              | DCC: at 30 sec                    | Haemoglobin & haematocrit in NICU from admission to discharge |
| USA [113] (Strauss)      | 2008               | n/a                         | 158[101]    | ≤36 weeks' GA                              | DCC: 60 sec                                                                                           | ICC                               | RBC volume/mass, per biotin labelling                         |
| USA [114] (Yared/Young)  | n/a                | 2015/2016                   | 39          | Very low birth weight (500 to 1500 grams)* | DCC: at 60 sec                                                                                        | DCC: at 30 sec                    | IVH (during NICU admission up to 6 months)                    |
| Thailand [115] (Pongmee) | 2010 (abstract)    |                             | 43          | <35 weeks' GA                              | UCM: x2 along 30 cm after cutting                                                                     | ICC                               | Initial haematocrit, need for blood transfusion               |

\* only those born <37 weeks gestation eligible

\*\* PI advised individual participant data not available due to time elapsed since trial

PI = Principal Investigator

cm = centimetres

sec = seconds

min = minutes

|                                            |                                        |                                          |                                   |
|--------------------------------------------|----------------------------------------|------------------------------------------|-----------------------------------|
| NICU = neonatal intensive care unit        | GA = gestational age                   | PMA = postmenstrual age                  | ICC = immediate cord clamping     |
| DCC = deferred cord clamping               | UCM = umbilical cord milking           | PBCC = physiological based cord clamping | RBC = red blood cell              |
| CPAP = continuous positive airway pressure | PO2 = partial pressure of oxygen       | PPV = positive pressure ventilation      | NIRS = near-infrared spectroscopy |
| PVL = periventricular leukomalacia         | ROP = retinopathy of prematurity       | BPD = bronchopulmonary dysplasia         | EEG = electroencephalogram        |
| IVH = intraventricular haemorrhage         | PVH = periventricular haemorrhage      | HIE = hypoxic ischemic encephalopathy    |                                   |
| NEC = necrotising enterocolitis            | IUGR = intrauterine growth retardation | PCV = polycythaemia                      |                                   |

1. ISRCTN registry website: **Early compared to delayed umbilical cord clamping in very small prematurely born babies: A study to know which one is better for infant health.** <http://www.isrctn.com/ISRCTN12219110>. Accessed August 27, 2018.
2. ANZCTR registry website: **Resuscitating newborn infants with the umbilical cord intact- The Baby-Directed Umbilical Cord Cutting (Baby-DUCC) Trial.** <http://www.anzctr.org.au/ACTRN12618000621213.aspx>. Accessed 20th February, 2019.
3. McDonnell M, Henderson-Smart D: **Delayed umbilical cord clamping in preterm infants: a feasibility study.** *Journal of paediatrics and child health* 1997, **33**(4):308-310.
4. ANZCTR website: **CORD CLAMPING STUDY: Early versus delayed cord clamping and its effects on infant heart rate and oxygen saturation in the first minutes after birth.** <https://www.anzctr.org.au/Trial/Registration/TrialReview.aspx?id=365659>. Access 20th February, 2019.
5. Australian New Zealand Clinical Trials Registry: **Australian Placental Transfusion Pilot Study: investigating standard cord clamping procedures versus three methods of autologous placental blood transfusion in pre term infants.** <https://www.anzctr.org.au/Trial/Registration/TrialReview.aspx?ACTRN=12609000248268>. Accessed February 20, 2019.
6. Tarnow-Mordi W, Morris J, Kirby A, Robledo K, Askie L, Brown R, Evans N, Finlayson S, Fogarty M, Gebiski V *et al*: **Delayed versus Immediate Cord Clamping in Preterm Infants.** *New England Journal of Medicine* 2017, **377**(25):2445-2455.
7. ClinicalTrials.gov registry: **C-UCM and Cerebral Oxygenation and Perfusion.** Available at <https://clinicaltrials.gov/ct2/show/NCT03748914>. Accessed February 20, 2019.
8. Yasmeen S, Shahidullah M, Mannan M, Dey A, Chowdhury R, Haque A, Hassan MZ: **Iron Status in Early versus Delayed Cord Clamping Groups of Preterm Neonates Delivered in a Tertiary Level Hospital.** *Journal of Armed Forces Medical College, Bangladesh* 2015, **10**(2):62-65.
9. Chu K, Whittle W, Windrim R, Shah P, Murphy K: **The DUC trial: A pilot randomized controlled trial of immediate vs. delayed umbilical cord clamping in preterm infants born between 24 and 32 weeks gestation.** *American Journal of Obstetrics and Gynecology* 2011, **204**(1 Suppl):S201.
10. El-Naggar W, Simpson D, Hussain A, Armson A, Dodds L, Warren A, Whyte R, McMillan D: **Cord milking versus immediate clamping in preterm infants: a randomised controlled trial.** *Archives of Disease in Childhood - Fetal and Neonatal Edition* 2019, **104**(2):F145-F150.
11. Saigal S, O'Neill A, Surainder Y, Chua LB, Usher R: **Placental transfusion and hyperbilirubinemia in the premature.** *Pediatrics* 1972, **49**(3):406-419.
12. Dai S, Jin X, Qi HJ: **Effect of different cord clamping times on the prognosis of newborns (不同断脐时间对新生儿预后的影响).** *Modern Pract Med* 2014, **26**:69-71.
13. Dong XY, Sun XF, Li MM, Yu ZB, Han SP: **Influence of delayed cord clamping on preterm infants with a gestational age of <32 weeks [in Chinese].** *Zhongguo Dang Dai Er Ke Za Zhi* 2016, **18**:635-638.

14. Chinese Clinical Trial Registry website: **Effect of delayed cord clamping versus umbilical cord milking on cerebral blood flow in preterm infant: a randomized, double-blind controlled trial.** <http://www.chictr.org.cn/showprojen.aspx?proj=30981>. Accessed February 20, 2019.
15. Hu X, Xu X: **The Effects of Different Cord Clamping Time in Preterm Infants by Vaginal Delivery** [Master's Degree Thesis] Zhejiang University; 2015.
16. Clinical Trials website: **Immediate VS Delayed Cord Clamping on Newborns.** <https://clinicaltrials.gov/ct2/show/NCT01029496> last accessed August 30, 2018.
17. Li J, Yu B, Wang W, Luo D, Dai Q-l, Gan X-q: **Does intact umbilical cord milking increase infection rates in preterm infants with premature prolonged rupture of membranes?** *The Journal of Maternal-Fetal & Neonatal Medicine* 2018:1-7.
18. Chinese Clinical Trial Registry website: **Delayed cord clamping prevents respiratory distress of infants delivered by selective cesarean section, a randomized controlled trial.** <http://www.chictr.org.cn/showprojen.aspx?proj=30199>. Accessed February 20, 2019.
19. Shi W, Peng J, Chen N: **Effect of delayed cord clamping on outcome of delivery.** *Henan Journal of Preventive Medicine* 2017, **28**:85-87.
20. Clinical Trials website: **The Study on Umbilical Cord Milking to Prevent and Decrease the Severity of Anemia in Preterms.** <https://clinicaltrials.gov/ct2/show/NCT03023917> last accessed August 31, 2018.
21. Australian New Zealand Clinical Trials Registry: **Delayed fetal cord clamping in preterm labour, Risk and benefits.** <https://www.anzctr.org.au/Trial/Registration/TrialReview.aspx?id=374731>. Accessed February 21, 2019.
22. ClinicalTrials.gov registry: **Impact of Umbilical Cord Milking in Preterm Neonates With Placental Insufficiency.** <https://clinicaltrials.gov/ct2/show/NCT03731611> Accessed February 21, 2019.
23. ClinicalTrials.gov registry: **Effect of Delayed Cord Clamping in Preterm Neonates With Placental Insufficiency, available at** <https://clinicaltrials.gov/ct2/show/NCT03731546>. Last accessed Feb 21, 2019.
24. Nelle M, Fisher S, Conze S, Beedgen B, Linderkamp O: **Effects of late cord clamping on circulation in prematures (VLBWI).** *Pediatric Research* 1998, **44**(3):454.
25. Rabe H, Wacker A, Hülkamp G, Hörnig-Franz I, Schulze-Everding A, Harms E, Cirkel U, Louwen F, Witteler R, Schneider HP: **A randomised controlled trial of delayed cord clamping in very low birth weight preterm infants.** *Eur J Pediatr* 2000, **159**(10):775-777.
26. ClinicalTrials.gov registry: **Umbilical Cord Milking in Neonates Who Are Depressed at Birth (MIDAB).** Available at <https://clinicaltrials.gov/ct2/show/NCT03657394>. Last accessed February 21, 2019.
27. Clinical Trials Registry India website: **Comparison of advantages and disadvantages of early and delayed umbilical cord clamping in low birth weight newborns.** [http://ctri.nic.in/Clinicaltrials/pdf\\_generate.php?trialid=16653&EncHid=&modid=&compid=%27,%2716653det%27](http://ctri.nic.in/Clinicaltrials/pdf_generate.php?trialid=16653&EncHid=&modid=&compid=%27,%2716653det%27) last accessed February 21, 2019.
28. Clinical Trials Registry India website: **The effects of umbilical cord squeezing in newborn babies requiring some form of intervention to help and support breathing at birth.** [http://www.ctri.nic.in/Clinicaltrials/pdf\\_generate.php?trialid=18641&EncHid=&modid=&compid=%27,%2718641det%27](http://www.ctri.nic.in/Clinicaltrials/pdf_generate.php?trialid=18641&EncHid=&modid=&compid=%27,%2718641det%27), last accessed February 21, 2019.
29. Chopra A, Thakur A, Garg P, Kler N, Gujral K: **Early versus delayed cord clamping in small for gestational age infants and iron stores at 3 months of age-a randomized controlled trial.** *BMC pediatrics* 2018, **18**(1):234.

30. Das B, Sundaram V, Tarnow-Mordi W, Ghadge A, Dhaliwal LK, Kumar P: **Placental transfusion in preterm neonates of 30–33 weeks' gestation: a randomized controlled trial.** *Journal of Perinatology* 2018, **38**:496–504.
31. Datta V, Kumar A, Yadav R: **A randomized controlled trial to evaluate the role of brief delay in cord clamping in preterm neonates (34–36 weeks) on short-term neurobehavioural outcome.** *Journal of Tropical Pediatrics* 2017, **63**(6):418–424.
32. Dhaliwal LK, Anjumunnisa S, Kumar P, Saha PK, Venkateseshan S: **Effects of placental transfusion in preterm birth.** *J Matern Fetal Neonatal Med* 2014, **27**(S1):369–370.
33. Dipak NK, Nanavat RN, Kabra NK, Srinivasan A, Ananthan A: **Effect of Delayed Cord Clamping on Hematocrit, and Thermal and Hemodynamic Stability in Preterm Neonates: A Randomized Controlled Trial.** *Indian Pediatr* 2017, **54**(2):112–115.
34. Clinical Trials Registry India website: **Effect of umbilical cord milking of late preterm and term infants on maternal and neonatal outcomes in a tertiary care hospital in South India: A randomized control trial.** <http://www.ctri.nic.in/Clinicaltrials/pmaindet2.php?trialid=19631> last accessed February 21, 2019.
35. Clinical Trials Registry India website: **Early versus Delayed Cord clamping in IUGR Preterms a Randomised controlled study.** <http://ctri.nic.in/Clinicaltrials/showallp.php?mid1=25064&EncHid=&userName=015204> last accessed February 21, 2019.
36. Kumar B, Upadhyay A, Gothwal S, Jaiswal V, Joshi P, Dubey K: **Umbilical Cord Milking and Hematological Parameters in Moderate to Late Preterm Neonates: A Randomized Controlled Trial.** *Indian Pediatr* 2015, **52**(9):753–757.
37. Clinical Trials Registry India website: **Umbilical cord milking in preterm neonates requiring resuscitation: A randomized controlled trial** <http://www.ctri.nic.in/Clinicaltrials/pmaindet2.php?trialid=10609> last accessed August 31, 2018.
38. Rana A, Agarwal K, Ramji S, Gandhi G, Sahu L: **Safety of delayed umbilical cord clamping in preterm neonates of less than 34 weeks of gestation: a randomized controlled trial.** *Obstetrics & Gynecology Science* 2018, **61**(6):655–661.
39. Ranjit T, Nesargi S, Rao PNS, Sahoo JP, Ashok C, Chandrakala BS, Bhat S: **Effect of Early versus Delayed Cord Clamping on Hematological Status of Preterm Infants at 6 wk of Age.** *The Indian Journal of Pediatrics* 2015, **82**(1):29–34.
40. Clinical Trials Registry India website: **Comparison of Umbilical cord milking with Delayed cord clamping in late preterm and term neonates: Randomized control trial.** [www.ctri.nic.in/Clinicaltrials/pmaindet2.php?trialid=14204](http://www.ctri.nic.in/Clinicaltrials/pmaindet2.php?trialid=14204). Accessed August 31, 2018.
41. Clinical Trials Registry India website: **Effect of cord milking on hemodynamic status and morbidities in neonates more than 35 weeks of gestation.** <http://www.ctri.nic.in/Clinicaltrials/pmaindet2.php?trialid=3182> last accessed August 31, 2018.
42. ClinicalTrials.gov registry: **Effect of Intact Umbilical Cord Milking on Neonatal and First Year Neurodevelopmental Outcomes in Very Preterm Infants. (Cord Milking).** <https://clinicaltrials.gov/ct2/show/NCT03200301> last accessed February 22, 2019.
43. Armanian AM, Ghasemi Tehrani H, Ansari M, Ghaemi S: **Is "Delayed Umbilical Cord Clamping" Beneficial for Premature Newborns?** *Int J Pediatr* 2017, **5**(5):4909–4918.
44. Kazemi MV, Akbarianrad Z, Zahedpasha Y, Mehraein R, Mojaveri MH: **Effects of Delayed Cord Clamping on Intraventricular Hemorrhage in Preterm Infants.** *Iran J Pediatr* 2017 **27**(5):e6570.
45. Iranian Registry of Clinical Trials website: **Investigation and comparison of neonatal complications of two methods of umbilical cord milking and early cord clamping in neonates.** <http://enirct.ir/trial/29424> last accessed February 22, 2019.

46. Sekhavat L, Tabatabaai A: **Immediate and delayed cord clamping in infants born between 26 and 34 weeks.** *Journal of Maternal-Fetal and Neonatal Medicine* 2008, **21**((Suppl 1)):181–182.
47. Iranian Registry of Clinical Trials website: **The delayed umbilical cord clamping effects on early outcome in Preterm neonates.** <http://enirctir/trial/17924> last accessed February 22, 2019.
48. ISRCTN registry website: **Clamping the umbilical cord in premature deliveries (CUPID).** <http://www.isrctn.com/ISRCTN92719670> last accessed August 27, 2018.
49. Kugelman A, Borenstein-Levin L, Riskin A, Chistyakov I, Ohel G, Gonen R, Bader D: **Immediate versus delayed umbilical cord clamping in premature neonates born < 35 weeks: a prospective, randomized, controlled study.** *Am J Perinatol* 2007, **24**(5):307–315.
50. Pratesi S, Montano S, Ghirardello S, Mosca F, Boni L, Tofani L, Dani C: **Placental circulation intact trial (PCI-T)-resuscitation with the placental circulation intact versus cord milking for very preterm infants: a feasibility study.** *Frontiers in pediatrics* 2018, **6**:364.
51. Hosono S, Mugishima H, Fujita H, Hosono A, Minato M, Okada T, Takahashi S, Harada K: **Umbilical cord milking reduces the need for red cell transfusions and improves neonatal adaptation in infants born at less than 29 weeks' gestation: a randomised controlled trial.** *Arch Dis Child Fetal Neonatal Ed* 2008, **93**(1):F14–19.
52. UMIN clinical trials registry: **A multicenter randomized control study of the effect of umbilical cord milking.** [https://uploadumin.ac.jp/cqi-open-bin/ctr\\_e/ctr\\_viewcqi?recptno=R000001193](https://uploadumin.ac.jp/cqi-open-bin/ctr_e/ctr_viewcqi?recptno=R000001193) last accessed 31 August, 2018.
53. Song SY, Kim Y, Kang BH, Yoo HJ, Lee M: **Safety of umbilical cord milking in very preterm neonates: a randomized controlled study.** *Obstet Gynecol Sci* 2017, **60**(6):527–534.
54. Zisovska E, Lazarevska L, Spasova L, Zivkovik J: **The effect of delayed cord clamping on the need for blood transfusion: P17.** *Transfusion Alternatives in Transfusion Medicine* 2008, **10**.
55. Clinical Trials website: **Effect of Timing of Umbilical Cord Clamping on Anaemia at 8 and 12 Months and Later Neurodevelopment.** <https://clinicaltrials.gov/ct2/show/NCT02222805> last accessed August 27, 2018.
56. ISRCTN registry website: **Effect of timing of cord clamping in newborns during first 10 minutes of birth.** <http://www.isrctn.com/ISRCTN10944304> last accessed August 27, 2018.
57. Knol R, Brouwer E, Klumper F, Van den Akker T, DeKoninck P, Hutten J, Lopriore E, Van Kaam A, Polglase GR, Reiss I: **Effectiveness of Stabilization of Preterm Infants With Intact Umbilical Cord Using a Purpose-Built Resuscitation Table-Study Protocol for a Randomized Controlled Trial.** *Frontiers in pediatrics* 2019, **7**:134.
58. ClinicalTrials.gov registry: **Aeration, Breathing, Clamping Study 3 (ABC3).** <https://clinicaltrials.gov/ct2/show/NCT03808051> last accessed February 22, 2019.
59. Ultee CA, van der Deure J, Swart J, Lasham C, van Baar AL: **Delayed cord clamping in preterm infants delivered at 34 36 weeks' gestation: a randomised controlled trial.** *Arch Dis Child Fetal Neonatal Ed* 2008, **93**(1):F20–23.
60. Australian New Zealand Clinical Trials Registry: **Provision of breathing support during delayed cord clamping in preterm infants.** <https://www.anzctr.org.au/Trial/Registration/TrialReview.aspx?id=369228>, last accessed November 06, 2019.
61. Malik AU, Shah Nawaz K, Riaz A: **Comparison between the Efficacy of Early and Delayed Umbilical Cord Clamping in Preterm Infants.** *Pak J Med Health Sci* 2013, **7**(4):992–995.

62. ClinicalTrials.gov registry: **Deferred Cord Clamping Compared to Umbilical Cord Milking in Preterm Infants.**  
<https://clinicaltrials.gov/ct2/show/NCT02996799> last accessed February 22, 2019.
63. ClinicalTrials.gov registry: **The Hematologic Impact of Umbilical Cord Milking Versus Deferred Cord Clamping in Premature Neonates.**  
<https://clinicaltrials.gov/ct2/show/NCT03147846> last accessed February 22, 2019.
64. Hofmeyr GJ, Bolton KD, Bowen DC, Govan JJ: **Periventricular/intraventricular haemorrhage and umbilical cord clamping. Findings and hypothesis.** *S Afr Med J* 1988, **73**(2):104-106.
65. Hofmeyr GJ, Gobetz L, Bex PJM, Van Der Griendt M, Nikodem C, Skapinker R, Delahunt T: **Periventricular/intraventricular hemorrhage following early and delayed umbilical cord clamping. A randomized controlled trial.** . *Online J Curr Clin Trials* 1993(110).
66. Tiemersma S, Heistein J, Ruijne R, Lopez G, van Lobenstein J, van Rheezen P: **Delayed cord clamping in South African neonates with expected low birthweight: a randomised controlled trial.** *Tropical Medicine & International Health* 2015, **20**(2):177-183.
67. ISRCTN registry website: **DElayed COrd CLAmPing versus early cord clamping in preterm infants born between 24 and 34 weeks.**  
<http://www.isrctn.com/ISRCTN66018314> last accessed August 27, 2018.
68. Clinical Trials website: **Umbilical Cord Milking vs Delayed Cord Clamping in Preterm Infants Born by Cesarean Section.**  
<https://clinicaltrials.gov/ct2/show/NCT02187510> last accessed August 30, 2018.
69. Lago Leal V, Pamplona Bueno L, Cabanillas Vilaplana L, Nicolas Montero E, Martin Blanco M, Fernandez Romero C, El Bakkali S, Pradillo Aramendi T, Sobrino Lorenzano L, Castellano Esparza P *et al*: **Effect of Milking Maneuver in Preterm Infants: A Randomized Controlled Trial.** *Fetal diagnosis and therapy* 2019, **45**(1):57-61.
70. Clinical Trials website: **Timing of Umbilical Cord Occlusion in Premature Babies( <33 w). Delayed vs Early. (CODE-P).**  
<https://clinicaltrials.gov/ct2/show/NCT02187874> last accessed August 27, 2018.
71. Baenziger O, Stolkin F, Keel M, von Siebenthal K, Fauchere JC, Das Kundu S, Dietz V, Bucher HU, Wolf M: **The influence of the timing of cord clamping on postnatal cerebral oxygenation in preterm neonates: a randomized, controlled trial.** *Pediatrics* 2007, **119**(3):455-459.
72. ISRCTN registry website: **Can squeezing blood from the umbilical cord into the baby reduce death and illness in premature babies?**  
<http://www.isrctn.com/ISRCTN17228884> last accessed February 26, 2019.
73. Thai Clinical Trials Registry website: **Effect of delayed cord clamping versus cord milking in infants born at < 34 weeks gestation: a randomized controlled trial.** <http://www.clinicaltrials.in.th/index.php?tp=regtrials&menu=trialsearch&smenu=fulltext&task=search&task2=view1&id=1277> last accessed August 31, 2018.
74. Thai Clinical Trials Registry website: **Delayed cord clamping reduced anemic outcome in preterm neonate,**  
<http://www.clinicaltrials.in.th/index.php?tp=regtrials&menu=trialsearch&smenu=fulltext&task=search&task2=view1&id=3833> last accessed Feb 25, 2019.
75. Mungkorakaew S, Siwadune T: **The Difference of Hematocrit in Term and Preterm Vaginal Births in Different Timing of Delayed Cord Clamping.** *Thai Journal of Obstetrics and Gynaecology* 2015:223-230.
76. Thai Clinical Trials Registry website: **Effects of delayed versus early cord clamping in late preterm infants: a randomized controlled trial.**  
<http://www.clinicaltrials.in.th/index.php?tp=regtrials&menu=trialsearch&smenu=fulltext&task=search&task2=view1&id=1279> last accessed August 29, 2018.

77. Thai Clinical Trials Registry website: **Comparison of Three Types of Placental transfusion in Preterm Infants: A Randomized Controlled Trial.** <http://www.clinicaltrials.inth/index.php?tp=reqtrials&menu=trialssearch&smenu=fulltext&task=search&task2=view1&id=4427> last accessed November 06, 2019.
78. Thai Clinical Trials Registry website: **A Randomized Controlled Trial of Immediate versus Delayed Umbilical Cord Clamping in Preterm Infants of Multiple Births.** <http://www.clinicaltrials.inth/index.php?tp=reqtrials&menu=trialssearch&smenu=fulltext&task=search&task2=view1&id=2189> last accessed August 29, 2018.
79. Salae R, Tanprasertkul C, Somprasit C, Bhamarapratana K, Suwannarurk K: **Efficacy of delayed versus immediate cord clamping in late preterm newborns following normal labor: a randomized control trial.** *J Med Assoc Thai* 2016, **99**(4):S159-S165.
80. Thai Clinical Trials Registry website: **The Effect of One-Time Umbilical Cord Milking and Early Cord Clamping in Preterm Infants: A Randomized Controlled Trial (One-Time Umbilical Cord Milking).** <http://clinicaltrials.inth/index.php?tp=reqtrials&menu=trialssearch&smenu=fulltext&task=search&task2=view1&id=2347> last accessed August 31, 2018.
81. Alan S, Arsan S, Okulu E, Akin IM, Kilic A, Taskin S, Cetinkaya E, Erdevi O, Atasay B: **Effects of Umbilical Cord Milking on the Need for Packed Red Blood Cell Transfusions and Early Neonatal Hemodynamic Adaptation in Preterm Infants Born ≤1500 g: A Prospective, Randomized, Controlled Trial.** *Journal of Pediatric Hematology/Oncology* 2014, **36**(8):e493-e498.
82. Gokmen Z, Ozkiraz S, Tarcin A, Kozanoglu I, Ozcimen Emel E, Ozbek N: **Effects of delayed umbilical cord clamping on peripheral blood hematopoietic stem cells in premature neonates.** *Journal of Perinatal Medicine* 2011, **39**:323–329.
83. Kilicdag H, Gulcan H, Hanta D, Torer B, Gokmen Z, Ozdemir SI, Antmen BA: **Is umbilical cord milking always an advantage?** *The Journal of Maternal-Fetal & Neonatal Medicine* 2016, **29**(4):615-618.
84. Silahli M, Duman E, Gokmen Z, Toprak E, Gokdemir M, Ecevit A: **The relationship between placental transfusion, and thymic size and neonatal morbidities in premature infants - A Randomized Control Trial.** *JPMA The Journal of the Pakistan Medical Association* 2018, **68**(11):1560-1565.
85. Aladangady N, McHugh S, Aitchison TC, Wardrop CA, Holland BM: **Infants' blood volume in a controlled trial of placental transfusion at preterm delivery.** *Pediatrics* 2006, **117**(1):93-98.
86. Duley L, Dorling J, Pushpa-Rajah A, Oddie SJ, Yoxall CW, Schoonakker B, Bradshaw L, Mitchell EJ, Fawke JA: **Randomised trial of cord clamping and initial stabilisation at very preterm birth.** *Archives of Disease in Childhood - Fetal and Neonatal Edition* 2018, **103**(1):F6-F14.
87. Kinmond S, Aitchison TC, Holland BM, Jones JG, Turner TL, Wardrop CA: **Umbilical cord clamping and preterm infants: a randomised trial.** *BMJ (Clinical research ed)* 1993, **306**(6871):172-175.
88. Medina IMF: **Late clamping of the umbilical cord in premature neonates: The real haemodynamic benefits.** *Enfermeria Clinica* 2014, **24**(5):305-308.
89. Rabe H, Jewison A, Alvarez RF, Crook D, Stilton D, Bradley R, Holden D: **Milking compared with delayed cord clamping to increase placental transfusion in preterm neonates: a randomized controlled trial.** *Obstetrics & Gynecology* 2011, **117**(2):205-211.
90. Backes CH, Huang H, Iams JD, Bauer JA, Giannone PJ: **Timing of umbilical cord clamping among infants born at 22 through 27 weeks' gestation.** *J Perinatol* 2016, **36**(1):35-40.

91. Clinical Trials website: **Effects of Delayed Cord Clamp and/or Indomethacin on Preterm Infant Brain Injury.** <https://clinicaltrials.gov/ct2/show/NCT02221219> last accessed August 27, 2018.
92. ClinicalTrials.gov registry: **Relationship Between Delayed Cord Clamping at Birth and Neonatal Bilirubin Levels in Parturients With a Prior Child Requiring Therapy for Neonatal Jaundice,** <https://clinicaltrials.gov/ct2/show/NCT03741803> last accessed February 25th, 2019.
93. Clinical Trials website: **Milking the Umbilical Cord Versus Immediate Clamping in Pre-term Infants < 33 Weeks.** <https://clinicaltrials.gov/ct2/show/NCT01819532> last accessed August 30, 2018.
94. March MI, Hacker MR, Parson AW, Modest AM, de Veciana M: **The effects of umbilical cord milking in extremely preterm infants: A randomized controlled trial.** *J Perinatol* 2013, **33**(10):763-767.
95. ClinicalTrials.gov registry: **Delayed Umbilical Cord Clamping Versus Cord Milking in Preterm Neonate,** <https://clinicaltrials.gov/ct2/show/NCT01393834> last accessed 25th February, 2019.
96. Clinical Trials website: **A Randomized Controlled Trial of Immediate Versus Delayed Cord Clamping in the Preterm Neonate.** <https://clinicaltrials.gov/ct2/show/NCT00579839> last accessed August 27, 2018.
97. Ibrahim HM, Krouskop RW, Lewis DF, Dhanireddy R: **Placental transfusion: umbilical cord clamping and preterm infants.** *Journal of Perinatology* 2000, **20**(6):351.
98. Josephsen J, Vlastos E, Potter S, Al-Hosni M: **Milking the umbilical cord in extreme preterm infants.** *Am J Obstet Gynecol* 2014, **10**(1 Suppl):S403-404.
99. Katheria AC, Leone TA, Woelkers D, Garey DM, Rich W, Finer NN: **The effects of umbilical cord milking on hemodynamics and neonatal outcomes in premature neonates.** *J Pediatrics* 2014, **164**(5):1045-1050.
100. Katheria AC, Truong G, Cousins L, Oshiro B, Finer NN: **Umbilical cord milking versus delayed cord clamping in preterm infants.** *Pediatrics* 2015, **136**(1):61-69.
101. Katheria A, Poeltler D, Durham J, Steen J, Rich W, Arnell K, Maldonado M, Cousins L, Finer N: **Neonatal Resuscitation with an Intact Cord: A Randomized Clinical Trial.** *Journal of Pediatrics* 2016, **178**:75-80.e73.
102. ClinicalTrials.gov registry: **Premature Infants Receiving Milking or Delayed Cord Clamping: PREMOD2.** Available at <https://clinicaltrials.gov/ct2/show/NCT03019367>. Accessed August 23, 2019.
103. ClinicalTrials.gov registry: **Umbilical Cord Milking in Non-Vigorous Infants (MINVI).** Available at <https://clinicaltrials.gov/ct2/show/NCT03631940>. Accessed August 23, 2019.
104. Clinical Trials website: **VentFirst: A Multicenter RCT of Assisted Ventilation During Delayed Cord Clamping for Extremely Preterm Infants.** <https://clinicaltrials.gov/ct2/show/NCT02742454> last accessed August 27, 2018.
105. Krueger MS, Eyal FG, Peevy KJ, Hamm CR, Whitehurst RM, Lewis DF: **Delayed cord clamping with and without cord stripping: A prospective randomized trial of preterm neonates.** *Am J Obstet Gynecol* 2015, **212**(3):394.e391-395.
106. Clinical Trials website: **Optimal Timing of Cord Clamping in Preterm Pregnancy Following Vaginal or Cesarean Delivery (CordClamp).** <https://clinicaltrials.gov/ct2/show/NCT01766908> last accessed August 27, 2018.
107. Mercer JS, McGrath MM, Hensman A, Silver H, Oh W: **Immediate and delayed cord clamping in infants born between 24 and 32 weeks: a pilot randomized controlled trial.** *Journal of perinatology* 2003, **23**(6):466.

## iCOMP

108. Mercer JS, Vohr BR, McGrath MM, Padbury JF, Wallach M, Oh W: **Delayed cord clamping in very preterm infants reduces the incidence of intraventricular hemorrhage and late-onset sepsis: a randomized, controlled trial.** *Pediatrics* 2006, **117**(4):1235-1242.
109. Mercer JS, Erickson-Owens DA, Vohr BR, Tucker RJ, Parker AB, Oh W, Padbury JF: **Effects of placental transfusion on neonatal and 18 month outcomes in preterm infants: a randomized controlled trial.** *J Pediatrics* 2016, **168**:50-55.
110. Oh W, Fanaroff AA, Carlo WA, Donovan EF, McDonald SA, Poole WK, Eunice Kennedy Shriver National Institute of Child Health and Human Development Neonatal Research Network: **Effects of delayed cord clamping in very-low-birth-weight infants.** *J Perinatol* 2011, **31**:S68-S71.
111. Clinical Trials website: **Delayed Cord Clamping in Preterm Neonates (DCC).** <https://clinicaltrials.gov/ct2/show/NCT02478684> last accessed August 29, 2018.
112. Clinical Trials website: **Delayed Clamping and Milking the Umbilical Cord in Preterm Infants.** <https://clinicaltrials.gov/ct2/show/NCT02092103> last accessed August 31, 2018.
113. Strauss RG, Mock DM, Johnson KJ, Cress GA, Burmeister LF, Zimmerman MB, Bell EF, Rijhsinghani A: **A randomized clinical trial comparing immediate versus delayed clamping of the umbilical cord in preterm infants: short-term clinical and laboratory endpoints.** *Transfusion* 2008, **48**(4):658-665.
114. ClinicalTrials.gov registry: **Delayed Cord Clamping in Very Low Birth Weight Infants (DCC).** Available at <https://clinicaltrials.gov/ct2/show/NCT02337088>. Accessed August 23, 2019.
115. Pongmee P, Nuntnarumit P: **Effects of umbilical cord milking on initial hematocrit and the need for blood transfusion in preterm infants.** In: **Pediatric Academic Societies Annual Meeting; 2010 May 1-4; Vancouver, Canada. 2010.**
